# Supplementary material for: A multifactorial model of pathology for age of onset heterogeneity in familial Alzheimer’s disease
Source: PubMed Central journal article supplement (PMC7847436; doi:10.1007/s00401-020-02249-0), 2020-12-14
Supplement: 401_2020_2249_MOESM1_ESM.pdf [file 401_2020_2249_MOESM1_ESM.pdf]

## Supplementary Materials for:

### A multifactorial model of pathology for age of onset variability in Familial Alzheimer's disease

Diego Sepulveda-Falla<sup>1,2\*</sup>; Lucia Chavez-Gutierrez<sup>3,4</sup>; Erik Portelius<sup>5,6</sup>; Jorge I Vélez<sup>7,8</sup>; Simon Dujardin<sup>9</sup>; Alvaro Barrera-Ocampo<sup>1,10</sup>; Felix Dinkel<sup>1</sup>; Christian Hagel<sup>1</sup>; Berta Puig<sup>1</sup>; Claudio Mastronardi<sup>7,11</sup>; Francisco Lopera<sup>2</sup>; Bradley T. Hyman<sup>9</sup>; Kaj Blennow<sup>5,6</sup>; Mauricio Arcos-Burgos<sup>11</sup>; Bart de Strooper<sup>3,4,12</sup>; Markus Glatzel<sup>1\*</sup>

Affiliations:

<sup>1</sup> Institute of Neuropathology, University Medical Center Hamburg-Eppendorf, Hamburg, Germany.

<sup>2</sup> Neuroscience Group of Antioquia, Faculty of Medicine, University of Antioquia, Medellín, Colombia.

<sup>3</sup> VIB center for Brain and disease Research, 3000 Leuven, Belgium.

<sup>4</sup> Department of Neurology, KU Leuven, Belgium.

<sup>5</sup> Institute of Neuroscience and Physiology, Dept. of Psychiatry and Neurochemistry. The Sahlgrenska Academy at the University of Gothenburg, Mölndal, Sweden.

<sup>6</sup> Clinical Neurochemistry Laboratory, Sahlgrenska University Hospital, Mölndal SE-431 80 Mölndal, Sweden.

<sup>7</sup> Department of Genome Sciences, John Curtin School of Medical Research, Australian National University, Canberra, ACT, Australia.

<sup>8</sup> Universidad del Norte, Barranquilla, Colombia.

<sup>9</sup> Department of Neurology, Massachusetts General Hospital, Harvard Medical School, MassGeneral Institute for Neurodegenerative Disease, Charlestown, USA.

<sup>10</sup> Universidad Icesi, Facultad de Ciencias Naturales, Departamento de Ciencias Farmaceuticas, Grupo Natura, Calle 18 No. 122 -135, Cali, Colombia

<sup>11</sup> GIPSI group, Department of Psychiatry, Medical Research Institute, University of Antioquia, Medellín, Colombia.

<sup>12</sup> UK Dementia Research Institute, University College London, Queen Square, WC1N 3BG London, UK.

\*Correspondence to: Diego Sepulveda-Falla (dsepulve@uke.de) and Markus Glatzel (m.glatzel@uke.de).

# Index

| <b>Item</b>                                                                                                                                     | <b>Page</b> |
|-------------------------------------------------------------------------------------------------------------------------------------------------|-------------|
| Extended Methods                                                                                                                                | 4           |
| Tables                                                                                                                                          | 11          |
| Table 1. Demographic and cognitive performance according to age of onset in 122 PSEN1 E280A patients                                            | 11          |
| Table 2. Logistic Regression of Age of Onset and Schooling time as predictors of cognitive domains scores in PSEN1 E280A Age of Onset subgroups | 12          |
| Table 3. Cases used for genetic, biochemical and pathological studies                                                                           | 13          |
| Table 4. Demographic and clinical characterization of PSEN1 E280A patients used for biochemical and pathological studies                        | 14          |
| Table 5. Demographic and clinical characterization of PSEN1 E280A patients used for biochemical and pathological studies (cont.)                | 15          |
| Table 6. A $\beta$ pathology according Age of Onset in PSEN1 E280A FAD                                                                          | 16          |
| Table 7. pTau pathology according Age of Onset in PSEN1 E280A FAD                                                                               | 19          |
| Table 8. pTau pathology comparison E-AOFAD vs LOSAD in PSEN1 E280A FAD                                                                          | 21          |
| Table 9. pTau-related Kinases levels according Age of Onset in PSEN1 E280A FAD                                                                  | 22          |
| Table 10. Novel significant uncommon variants after FDR and Major Haplotype analysis                                                            | 26          |
| Table 11. Top 20 Known uncommon variants, functional mutations                                                                                  | 27          |
| Table 12. Top 20 common variants, functional mutations                                                                                          | 28          |
| Table 13. Protein-protein interactions of identified genes                                                                                      | 29          |
| Table 14. Significant biological pathways from protein network                                                                                  | 31          |
| Table 15. Ubiquitination, polyubiquitination and polyubiquitinated pTau according Age of Onset in PSEN1 E280A FAD                               | 32          |
| Table 16. Primary antibodies used in the study                                                                                                  | 33          |
| Table 17. Secondary antibodies used in the study                                                                                                | 33          |
| Figures                                                                                                                                         | 34          |

|                                                                                                                                                                    |    |
|--------------------------------------------------------------------------------------------------------------------------------------------------------------------|----|
| Figure 1. AoO distribution in PSEN1 E280A                                                                                                                          | 34 |
| Figure 2. A $\beta$ pathology in AD cases                                                                                                                          | 35 |
| Figure 3. A $\beta$ peptides and enzymatic turnover of gamma secretase of SAD and FAD cases                                                                        | 36 |
| Figure 4. pTau pathology according to disease duration and Age of Onset in PSEN1 E280A FAD patients                                                                | 37 |
| Figure 5. Ultrastructural analysis of temporal cortex from the SAD and AoO groups of PSEN1 E280A                                                                   | 38 |
| Figure 6. Correlation analysis between levels of total Tau in TBS soluble fractions and AOO in PSEN1 FAD patients                                                  | 39 |
| Figure 7. Representative 3D rendering of clarified formalin fixed temporal cortices from PS1E280A FAD cases stained for synaptophysin and grouped by age of onset. | 40 |
| Figure 8. Synaptophysin particle distribution according to size in PS1 E280A FAD cases grouped by age of onset.                                                    | 41 |
| Figure 9. Representative blots of studied pTau-related kinases in Temporal cortex of controls, SAD and FAD cases                                                   | 42 |
| Figure 10. Correlation of normalized pERK1/2 / ERK1/2 ratio normalized GSK3 $\beta$ Y216 / GSK3 $\beta$ levels                                                     | 43 |
| Figure 11. Correlation of normalized pERK1/2 / ERK1/2 ratio and age of onset                                                                                       | 44 |
| Figure 12. Significantly different active Tyrosin and Serine/Threonine kinases between FAD cases and controls                                                      | 45 |
| Figure 13. Upstream kinase analysis of Tyrosine Kinases Ctrl vs LOFAD cases and dendritic tree of significantly specific kinases                                   | 46 |
| Figure 14. Upstream kinase analysis of Serine / Threonine Kinases Ctrl vs LOFAD cases and dendritic tree of significantly specific kinases                         | 47 |
| Figure 15. Demographic characteristics and distribution of risk / protective genetic variants according to age of onset in studied PSEN1 E280A cases               | 48 |
| Figure 16. Proof of principle for co-immunoprecipitation with anti-polyubiquitinated and anti-Tau antibodies in brain tissue                                       | 49 |
| Figure 17. Co-immunoprecipitation using monoclonal polyubiquitin antibody as bait and immunoblots for total Tau, pTau-S400 and pTau-S422                           | 50 |
| Figure 18. Correlation of polyubiquitinated proteins with S20 Chimotrypsin activity and normalized GSK3b Y216 / GSK3b levels                                       | 51 |
| Figure 19. Correlation of immunoprecipitated pTau S422/Tau with AoO, normalized pERK1/2 / ERK1/2 ratio and normalized GSK3b Y216 / GSK3b levels                    | 52 |
| Figure 20. pTau seeding activity in frontal cortex.                                                                                                                | 53 |

## Extended Methods

### *Patients and clinical data collection*

Descendants of patients with confirmed PSEN1 E280A mutations were enrolled into the E280A Antioquia cohort study, an ongoing work at the University of Antioquia, Colombia. Participants were included if they were aged over 17 years. There were no other exclusion criteria for medical and neuropsychological monitoring. All participants (both carriers and non-carriers of PSEN1 E280A) or their guardians provided written informed consent for participation in the study; if the physician thought that a participant had dementia, their guardian provided written informed consent. All assessed participants with no evident dementia and examiners were masked to genetic status throughout monitoring. For genetic analyses, genomic DNA was extracted from blood by standard protocols, and PSEN1 E280A characterization was done as previously described. 19 Genomic DNA was amplified with the primers PSEN1-S 5' AACAGCTCAGGAGAGGAATG 3' and PSEN1-AS 5' GATGAGACAAGTNCNTGAA 3'. We used the restriction enzyme BsmI for restriction fragment length polymorphism analysis. The study was approved by the medical ethics board of the University of Antioquia. Follow up was conducted as previously described (1). Briefly, follow-up examinations included medical and neuropsychological assessments, which focused on registration of memory complaints and general cognitive function. Neuropsychological tests were performed by neuropsychologically trained personnel. Medical history and neuropsychological assessments were stored at the systematized information system for the neuroscience group of Antioquia (SISNE).

For cognitive assessment of differences between ages of onset we used a protocol including the CERAD (consortium to establish a registry for Alzheimer's disease) neuropsychological test battery with additional neuropsychological tests, as previously described (1). Basic demographic information was collected, including schooling time. Minimental (MMSE) testing served as baseline examination. Tests were applied according to studied cognitive domain as follows. For memory assessments, we used the memory of three phrases test, Rey-Osterrieth complex figure test (recall), list of words tests (total corrects, total intrusions, recall, intrusions recall, recognition “yes”, and recognition “no”), and recall of line drawings test. We assessed language ability with the verbal fluency and naming test. To assess constructional praxis, we used the constructional praxis test and the Rey-Osterrieth complex figure test (copy). This expanded CERAD neuropsychological protocol has been validated for the Colombian population in participants over 50 years of age and it has been also established for normal parameters for participants under 50 years of age (1).

Furthermore, for neuropathological studies, Alzheimer's disease brain samples were collected from the Brain tissue bank from the University of Antioquia. PSEN1E280A FAD cases and sporadic cases or their families, signed informed consent for post-mortem brain donation and tissue use in scientific studies. All procedures were performed following ethical board approval from the University. Sporadic cases were selected based on clinical diagnosis of probable AD, lack of family history of dementia and tested as non-carriers for PSEN1 E280A mutation. Control cases were collected in the brain bank of the Bellvitge Hospital, Barcelona, Spain. They were selected based on lack of brain trauma, cognitive or neurological symptoms before death.

### *Morphological methods*

*Histopathological methods.* All morphological analyses were performed on 3  $\mu$ m thick de-paraffinized sections from cortices of SAD and PSEN1 E280A FAD cases (Table 3). Immunohistochemical stainings were performed following pre-treatment for antigen retrieval and probed with monoclonal anti-A $\beta$  antibody, anti pTau antibody and anti-A $\beta$  1-42 antibody (Table 16). All immunohistochemical stainings were performed on an automated Ventana HX system (Ventana-Roche Medical systems, Tucson, AZ, USA) following the manufacturer's instructions. Experimental groups were stained in one run for each antibody to provide uniform staining conditions. Primary antibodies were visualized using a standard diaminobenzidine streptavidin-biotin horseradish peroxidase method (Sigma Aldrich, Hamburg, Germany). For quantification of primary antibodies

immunoreactive, three representative regions (0,1349 mm<sup>2</sup> each) were analyzed by quantifying the area immunoreactive for each antigen using the AxioVision 4.6 software (Carl Zeiss, Oberkochen, Germany) according to published methods (2).

*Ultrastructural analysis.* Ultrastructural analysis was performed using glutaraldehyde-fixed brain tissue from SAD, EOFAD, AOFAD and LOFAD patients as previously described (2). Temporal cortex samples were excised from paraformaldehyde fixed tissue after localizing specific areas of extracellular pTau deposits or an equivalent area from LOFAD cases. Samples were fixed with glutaraldehyde and chrome-osmium, dehydrated in ethanol, and embedded in Epon 812 (Serva Electrophoresis GmbH). After polymerization, 1- $\mu$ m-thick sections were cut, stained with toluidine blue, and checked for presence of amyloid plaques. To further process them for electron microscopy, relevant specimens were cut into 60- to 80-nm-thick sections, which were contrasted with uranyl acetate and lead solution. Sections were viewed under a LEO EM 912AB electron microscope (Zeiss).

*Tissue clarification and imaging.* Formalin fixed 1 cm length x 1 cm width x 500  $\mu$ m thick, temporal cortex samples from 5 EOFAD, 5 AOFAD and 5 LOFAD cases were clarified using a CLARITY protocol as previously described (17). Briefly, samples were submerged in Hydrogel monomer solution (Paraformaldehyde 4%, Acrylamide/Bisacrylamide (40%) 19:1 2%/0.05% and VA-044 0.25%) during 7 days at 4°C. Tissue was transferred to a 50 ml tube in hydrogel solution and covered with olive oil, to be further incubated at 37°C during 4 h. Posteriorly the hydrogel was removed from the tissue to be washed twice with SDS clearing solution (1M Boric Acid pH 8.5, SDS 4%) 24 h, at room temperature. Samples were then incubated at 50°C in SDS clearing solution until transparency was achieved. After clearing, samples were thoroughly washed in a Triton-X 10%, NaN<sub>3</sub> 2% solution during 24 h, twice, at 37°C. Samples were then incubated in Synaptophysin primary antibody (Supp. Table. 16) at 1:50 at 37°C for 5 days, to be washed again 24 h, twice, at 37°C and incubated in secondary antibody at 1:50 at 37°C for 5 days. A final washing step of 24 h, twice, at 37°C was performed. Samples were incubated in 87% glycerol 3 h at room temperature prior to imaging and fixed flat to the bottom of an imaging dish with 63% TDE. A Z-stack of a minimum thickness of 100  $\mu$ m was acquired with a Leica TCS SP5 confocal microscope (Leica microsystems, Wetzlar, Germany). 3D synaptophysin positive particle counting was performed using the 3D objects counting plugin on ImageJ 1.52p (NIH, USA).

### ***Biochemical methods***

*Preparation of Soluble and Insoluble protein fractions.* Soluble and insoluble fractions from brain tissue were isolated as described by Tremblay C and colleagues (3). Briefly, temporal cortex from SAD and FAD patients (~100 mg) was homogenized in 4 volumes of Tris Buffered Saline (TBS) containing a cocktail of phosphatase and protease inhibitors (Roche, Mannheim, Germany). Samples were sonicated three times for 10 s and centrifuged at 100,000 g for 20 min at 4°C to obtain a TBS-soluble fraction containing cytosolic and extracellular proteins (Soluble fraction). The pellet was sonicated using 4 volumes of lysis buffer (150 mM NaCl, 10 mM NaH<sub>2</sub>PO<sub>4</sub>, 1% Triton X-100, 0.5% SDS, and 0.5% deoxycholate) with protease and phosphatase inhibitors. The homogenate was centrifuged at 100,000 g for 20 min at 4°C. The pellet was homogenized in 200  $\mu$ l of 90% formic acid and sonicated three times for 10 s to isolate the Insoluble protein fraction. Protein fractions were stored at -80°C for further experiments.

*Extraction of total protein from tissue.* Temporal cortex from Control, SAD, E-AOFAD and LOFAD cases (Table 3) were cleared of meninges and only grey matter was used for the procedure. Approximately 250 mg of tissue were cut in small pieces, poured into a glass Dounce tissue grinder type B and homogenized with ten even strokes in 1 mL of lysis buffer containing 150 mM NaCl, 20 mM Tris pH 7.4, 1 mM EDTA, 10% Glycerol, 1% NP40 and a cocktail of phosphatase and protease inhibitors (Roche, Mannheim, Germany). The homogenate was centrifuged at 13,000 g for 10 min at 4°C and the proteins present in the supernatant were

quantified using the bicinchoninic acid method (BCA Protein Assay Kit, Thermo, Dreieich, Germany). The protein extracts were stored at -80°C for further experiments.

*Western blotting.* Sodium dodecyl sulfate polyacrylamide gel electrophoresis (SDS-PAGE). Once proteins were quantified, SDS-PAGE was carried out using a 20 well electrophoresis system (VWR, Radnor, PA, USA) or a Miniprotean system (BioRad, München, Germany). Samples were mixed with loading buffer (0.375 M Tris pH 6.8, 50% glycerol, 10% SDS, 0.5 M DTT and 0.002% bromophenol blue) and heated to 95°C for 5 minutes. About 25 – 30 µg of protein were loaded into each well. After electrophoresis, proteins were transferred to nitrocellulose membranes (BioRad, München, Germany) using a Trans-blot Turbo Transfer system (BioRad, München, Germany) at 300 mA for 2 h. The membranes were incubated for 1 h in 5% non-fat milk dissolved in TTBS (100 mM Tris pH 7.5, 500 mM NaCl, 0.02% Tween-20) and incubated overnight at 4°C with primary antibody (Table 16). Subsequently, membranes were washed with TTBS and incubated with secondary antibody (Table 17) coupled to peroxidase for 1 h at room temperature. Immunoreactive signal was developed with the ECL Western Blotting chemiluminescence system (SuperSignal West Pico Chemiluminiscent Substrate, Thermo, Dreieich, Germany) and detected with a ChemiDoc system (BioRad, München, Germany). For some of total vs phosphorylated protein kinase blotting where the species of each antibody allowed it, the same membrane was first incubated with the phosphorylated antibody, it was developed and re-incubated with the total protein antibody of a different species. The images were analyzed using the quantification software QuantityOne (BioRad, München, Germany). The results of each sample were normalized to GAPDH and compared between groups. To minimize interassay variation, the samples from all experimental groups were processed in parallel. Regarding A $\beta$  oligomers, there is an intrinsic difficulty in distinguishing between A $\beta$  oligomers and APP fragments still containing the A $\beta$  sequence (4) and although it has been suggested that A $\beta$  oligomers rather than plaques are the main factor in A $\beta$ -related pathogenicity, existing evidence regarding their possible role in AD is unclear (5). Therefore, only small oligomers (< 40 kDa) were considered for quantification.

*Tricine gel electrophoresis.* TBS soluble fractions from temporal cortex were loaded into each well with loading buffer (0.15 M Tris pH 6.8, 36% Glycerol, 12% SDS, 0.3 M DTT, 0.002% Coomassie Blue) and heated to 95°C for 5 minutes before loading on precast 10%-20% Tricine gels (Thermo, Dreieich, Germany). The gels were run using cathode buffer (1 M Tris base, 1 M Tricine and 1% SDS) anode buffer (1 M Tris base and 0.225 M HCl) and transferred to nitrocellulose membranes (BioRad, München, Germany) using an electrophoretic transfer system (BioRad, München, Germany) at 300 mA for 80 min. Membranes were blocked, incubated with primary and secondary antibodies (Table 17 and 18) and detected as described above.

*A $\beta$  peptides analysis.* Brain tissue (frontal cortex) from SAD and PSEN1 E280A subjects (Table 3) was homogenized on ice in Tris-buffered saline containing complete protease inhibitor (Roche Diagnostics GmbH, Mannheim, Germany) as described previously (6). Briefly, formic acid (FA) was added (final concentration 70%) followed by further homogenization, sonication and centrifugation (30,000g, 1 h, +4°C). The supernatant was collected and dried in a vacuum centrifuge. The dried fraction was dissolved in 70% FA followed by centrifugation (30,000g, 1 h, +4°C). Before IP, the supernatant was neutralized using 0.5 M Tris. A $\beta$  peptides were immunoprecipitated using A $\beta$ -specific antibodies coupled to magnetic beads as described previously (6). Briefly, 4 µg of the anti-A $\beta$  antibodies 6E10 and 4G8 (Signet Laboratories, Dedham, MA, USA) was separately added to 50 µL each of magnetic Dynabeads M-280 Sheep Anti-Mouse IgG (Invitrogen, Carlsbad, CA, USA). The 6E10 and 4G8 antibody-coated beads were mixed and added to the CSF samples to which 0.025% Tween20 in phosphate-buffered saline (pH 7.4) had been added. After washing, the A $\beta$  isoforms were eluted using 100 µL 0.5% FA. Mass spectrometry was performed using a matrix-assisted-laser-desorption/ionization time-of-flight/time-of-flight (MALDI TOF/TOF) instrument (UltraFleXtreme, Bruker Daltonics, Bremen, Germany). Samples were prepared as described previously (6).

*In vitro gamma secretase activity assay.* Detergent resistant membrane preparation from human SAD (n=5) and FAD brains (n=23) CHAPSO resistant membranes were prepared for human brains (frontal cortex) which were frozen within 12 h postmortem as previously described in (7) with minor modifications. After carefully removing leptomeninges and blood vessels, < 250 mg blocks of tissue were homogenized in ~ 10 volumes of 10% sucrose in MES buffer (25 mM MES, pH 6.5, 150 mMNaCl) containing 1% CHAPSO (Sigma) and protease inhibitors. The homogenate was mixed with equal volume of 70% sucrose in MES buffer. 4 ml was placed at the bottom of an ultracentrifuge tube (Beckman, 344059) and overlaid with 4 ml of 35% sucrose and 4 ml of 5% sucrose prepared accordingly. The obtained gradients were centrifuged at 39,000 rpm for 20 h at 4°C on a SW 41Ti rotor (Beckman). After centrifugation the raft fraction (interface of 5%/35% sucrose) was carefully collected and re-centrifuged (50,000 rpm, 60 min, 4°C) in 20 mM PIPES, pH 7, 250 mM sucrose and 1M EGTA. The resultant pellet was re-suspended with above buffer using a 26G syringe and stored at -80°C until use. We adjusted CHAPSO resistant membrane fractions to 1 µg/µl in protein concentration with 20 mM PIPES, pH 7.0, 250 mM sucrose and 1 mM EGTA. To determine the novo production of Aβ peptides, 6 µg CHAPSO resistant membranes were incubated for 0 h or 4 h at 37°C with 1.5 µM C99-3XFLAG substrate. The activity assays were carried out in presence of 2.5% DMSO (or 1µM GSM in DMSO), 1mM EGTA, 0.3% Chapso and protease inhibitors. Reactions were loaded on the 4 spot MSD ELISA plate and Aβ38, Aβ40 and Aβ42 quantified. Ninety-six-well MULTI-SPOT SECTOR plates from Meso Scale Discovery (Mesoscale Cat# N45ZA-1) were pre-coated by the company with Janssen capturing antibodies (Aβ37, Aβ38, Aβ40, Aβ42) 300 µg/ml and stored at 4°C until use. Plates were brought to room temperature 30 min prior use and blocked with 150 µl/well 0.1 % casein buffer for 1.5 h at room temperature (600 rpm). After incubation, plates were rinsed 5 x with 200 µl/well washing buffer (PBS + 0.05 % Tween-20). Samples and standards (synthetic human Aβ1-38, Aβ1-40, Aβ1-42 peptides) were diluted in 0.1% casein buffer and loaded 25 µl of the sample mixed with 25 µl detection antibody (JRF/AβN/25) to the plate. After overnight incubation at 4°C, plates were rinsed and 150 µl/well of the 2x MSD read buffer T was added. The plates were immediately developed on MSD Sector Imager 6000. We determined the rates at which Aβ38, Aβ40 and Aβ42 are produced in each sample by subtracting the 0 h value from the 4 h value obtained by MSD ELISA and normalizing Aβ amounts against time to express rates in pM/h. The experiment was replicated three times for all FAD cases and three out of five SAD cases.

*Kinome profile characterization.* 50 mg of temporal cortex from selected cases (Table 3) was lysed at 0 °C using M-PER (Mammalian Protein Extraction Reagent, Thermo Scientific, MA, USA) lysis buffer (0.1 g/ml) containing Protease Inhibitor Cocktail (Roche, Manheim, Germany) and Phosphatase Inhibitor Cocktail (Roche, Manheim, Germany), and centrifuged at 10.000× g 10min, 4 °C. Supernatants we snap frozen in 100µl aliquots and stored at -80 °C. The protein concentration was determined using the Bradford Lowry Assay (Pierce Coomassie assay, Thermo, Dreieich, Germany). Frozen aliquots were never re-frozen but used directly for kinase activity determination. Kinase activity profiles were determined using the PamChip ® 96 serine/threonine (STK) and protein tyrosine (PTK) peptide microarray system from PamGene International B.V. ('s-Hertogenbosch, The Netherlands) according to the instructions of the manufacturer, and as described previously (8). All PamChip ® 96 array plates used in this study came from the same production batch and all plates were run on the same PamStation instrument. For each assay, 0.5µg of protein was used. Arrays were incubated 30 cycles in blocking buffer and 60 cycles in reaction buffer containing ATP (final concentration 100 µM; Sigma-Aldrich, St. Louis, MO, USA). Arrays were washed and incubated for 60min with a secondary antibody (polyclonal swine anti-rabbit Immunoglobulin/FITC). Images at 50ms exposure time were captured every 10min with an integrated CCD-based optical system in combination with Evolve software (version 1.5, PamGene International BV). After removal of the secondary antibody and a wash step, post-wash images were taken at different exposure times (20, 50, 100, and 200 ms). The PTK assay mixture contained the same kinase assay buffer, 100µM ATP and 0.01% BSA, supplemented with 4µl protein kinase (PK)-additive (PamGene International BV), 10mMDithiothreitol (DTT, Fluka, Sigma-Aldrich, St. Louis, MO, USA) and fluorescein isothiocyanate (FITC) labeled anti-phosphotyrosine antibody (PamGene International BV, 's-Hertogenbosch,

The Netherlands). For each PTK assay, 7.5µg of protein was used. Since a labeled antibody is present in the PTK assay mixture, peptide phosphorylation was monitored during the incubation with assay mixture, by taking images every 5min at 50 ms exposure time, allowing real time recording of the reaction kinetics (one-step reaction). After washing of the array, fluorescence was detected at different exposure times (20, 50, 100, and 200 ms). The fluorescent signal intensity for each peptide was analyzed using BioNavigator 6.1 software (PamGene International BV, 's-Hertogenbosch, The Netherlands) a statistical analysis and visualization software tool with an App-based infrastructure (<https://www.pamgene.com/en/bionavigator.htm>). For signal quantification, the slope of the fluorescent signal versus exposure time was calculated in order to increase the dynamic range and to filter out time differences between plates. Saturated signals were excluded. Visual quality control was performed to exclude defective arrays from the analysis. A linear mixed-effects model that analyzed the signals of all peptides jointly while taking the correlation structure into account was used. Change of log (signals) over log (time) was calculated. The obtained STK and PTK median kinase signal intensities were analyzed for common effects (for all peptides) and peptide-specific plate, strip and array random effects. The measurement error was modeled using a peptide-specific variance component covariance matrix that allowed for heterogeneous variances among exposure time points. The upstream protein kinases able to phosphorylate residues in peptides on the PTK and STK arrays were identified in the Human Protein Reference Database (<http://www.hprd.org>) (9), in Phosphosite (<http://www.phosphosite.org>) and Reactome (<http://www.reactome.org>) (10). These kinases were projected on the kinase phylogenetic tree using the Kinome Render tool (<http://bcb.med.usherbrooke.ca/kinomerender.php>). When databases used different names to indicate a kinase, the kinase names were converted to those used in Kinome Render via their UniProtID. For kinases linked to multiple UniProtIDs, only the ID used in the Kinome Render tool was retained (8).

*Chymotrypsin 20S proteasome activity assay.* Chymotrypsin 20S proteasome activity was tested in temporal cortex from controls and PSEN1 E280A cases using the 20S proteasome activity assay kit APT280 (Millipore-Merck, Darmstadt, Germany), following manufacturer instructions. Briefly, 20 mg of tissue was dounce homogenized with 20 strokes in 1:8 homogenization buffer (50 mM HEPES, 250 mM sucrose, 5 mM MgCl<sub>2</sub>, 0.5 mM DTT, 40 mM KCl pH 7.4), and centrifuged at 10,000g x 15 min. Suc-LLVY-AMC substrate 20S 12,5-0,1 µM dilution and 20S proteasome positive control 1:4 – 1:512 dilution were served on a 96-well plated together with 20 µg of protein from samples by triplicate with and without Lactacystin 5 µl 500 µM. Plate was incubated 2 h at 37°C and read using a 380/460 nm filter. Standard curves were calculated from AMC substrate and proteasome positive control dilutions, tissue samples activity was calculated subtracting values with inhibitor from inhibitor-free samples.

*pTau Seeding assay.* Finally, 300 mg of frozen temporal cortices were homogenized in 1500 µL of PBS + protease inhibitor (Roche) in a 2 mL glass dounce homogenizer (30 up/down strokes on ice by hand). The homogenate was transferred to a 1.5 mL Eppendorf tube and centrifuged at 10,000 x g for 10 min at 4°C. The supernatant was collected and aliquoted to avoid excessive freeze/thaw cycles. A bicinchoninic acid assay (BCA, Thermo Scientific Pierce) was performed to determine total protein concentration following the manufacturer's protocol. The in vitro seeding assay has been previously described and widely characterized (18, 19). Briefly, The Tau RD P301S FRET Biosensor (ATCC® CRL-3275™) cells stably expressing the repeat domain of Tau with the P301S mutation conjugated to either the cyan fluorescent protein (CFP) or the yellow fluorescent protein (YFP) (TauRD-P301S-CFP/YFP) were cultured at 37°C, 5% CO<sub>2</sub> in DMEM, 10% v/v fetal bovine serum, 0.5% v/v penicillin/streptomycin. Cells were plated on Costar Black, clear bottom 96-well plates (previously coated with 1:20 poly-D-lysine) at a density of 40,000 cells per well. Brain extracts (1 µg of total protein quantified by BCA per well) were then incubated with Lipofectamine 2000 (Invitrogen, final concentration 1% v/v) in opti-MEM (final volume 50 µL per well) for 10 min at room temperature before being added to the cells. Each condition was applied in triplicate or quadruplicate. After 24 h, Tau seeding was subsequently analysed using flow cytometry : Medium was removed and 50 µL trypsin 1x was added for 7 min at 37°C. Chilled DMEM + 10% fetal bovine serum (150 µL) was added to the trypsin and cells were transferred



to 96-well U-bottom plates (Corning). Cells were pelleted at 500 x g, resuspended in freshly-made 2% v/v paraformaldehyde in PBS (Electron Microscopy Services) for 10 min at room temperature in the dark, and pelleted at 500 × g. Cells were resuspended in chilled PBS and run on the MACSQuant VYB (Miltenyi) flow cytometer. CFP and Forster resonance energy transfer (FRET) were both measured by exciting the cells using the 405 nm laser and reading fluorescence emission at the 405/50 nm and 525/50 nm filters, respectively. To quantify the FRET signal, a bivariate plot of FRET vs. the CFP donor was generated and cells that received control brain extract alone were used to identify the FRET-negative population. Using this gate, the integrated FRET density (IFD) value for each well was calculated by multiplying the percent of FRET-positive cells by the median fluorescence intensity of that FRET-positive population. 40,000 events per well were analysed. Data was analysed using the MACSQuantify software (Miltenyi).

### ***Genetic and protein network analysis methods***

Fourteen patients with PSEN1 E280A FAD placed at the extremes of the AoO distribution (Table 3) were included for whole-exome capture (WEC). DNA was extracted from brain tissue and genomic DNA was processed by the Australian Genome Facility (Melbourne, VIC, Australia), an Illumina Certified Service Provider for the Infinium Genotyping Service, using the Infinium assay. DNA libraries were constructed from 1 µg of genomic DNA using an Illumina TruSeq genomic DNA library kit (Illumina Inc., San Diego, CA, USA). Libraries were multiplexed with 6 samples pooled together (500 ng of each). Exons were enriched from the pooled 3 µg of library DNA using an Illumina TruSeq Exome enrichment kit (Illumina Inc.). Each exome-enriched pool was run on a 100-base-pair paired-end run on an IlluminaHiSeq 2000 sequencer (Illumina Inc.). We surveyed 201,071 genomic regions in total using the exome capture platform. All regions were sampled at ~50Xcoverage. Sequencing image data were processed in real time using Illumina Real Time Analysis (RTA) software (Illumina Inc., San Diego, CA, USA), and converted to suitable formats using the CASAVA pipeline from Illumina. The resulting FASTQ files were further processed for variant analysis using Golden Helix®'s SNP variation suite (SVS) 8.3.0 (Golden Helix, Inc. Bozeman, MT, USA). The entire workflow of data curation and analysis for variant calling was developed by the Genome Discovery Unit at The Australian National University and consists of the following key steps: (i) quality assessment; (ii) read alignment; (iii) local realignment around the known and novel indel regions to refine indel boundaries; (iv) recalibration of base qualities; (v) variant calling; and (vi) assigning quality scores to variants as described elsewhere (11,12). Genotype files were processed in SVS 8.3.0. Samples with calls below Illumina®'s expected 99% SNVs call rates were excluded. Single nucleotide variants (SNVs) were excluded when (i) deviated from Hardy-Weinberg equilibrium with  $P < 2 \times 10^{-7}$ , (ii) the minimum genotype call rate was  $< 90\%$ , (iii) the number of alleles was one or more than two, and (iv) the MAF  $< 1\%$ . Genotype and allelic frequencies were estimated by maximum likelihood. Subsequently, a filtering phase including the identification of de novo SNVs; filtering of potentially pathogenic variants using SIFT PolyPhen-2 MutationTaster, Gerp++ and PhyloP; and filtering of damaging variants based on genes known to be associated with AD, was performed using information from dbSNP and the 1K Exome Project. De novo SNVs were defined according to the DNA-seq Analysis module in SVS 8.3.0. Potential relationships between AoO and SNVs were individually examined using one-way analysis of variance (ANOVA). P-values were obtained based on the F-statistic and corrected for multiple testing using the false discovery rate (FDR) and a method based on extremes-value theory, as explained elsewhere (13). Network analysis and pathway analysis was performed using NetworkAnalyst (14) webpage tools and Cytoscape software (15). Protein – protein interaction was assessed InnateDB (16) webpage tools.

### ***General statistical methods***

Data was analyzed using IBM SPSS Statistics 22 software (IBM/SPSS Inc., Armonk NY, USA), GraphPad Prism 6 (GraphPad Software, Inc., La Jolla, CA, USA) and R statistical software (R Foundation for Statistical Computing, Vienna, Austria). Analyses included distribution analysis, Hartigan's dip test, nonparametric tests

and  $\chi^2$  square test for categorical variables comparisons. ANOVA and logistic regression analysis were applied to AoO, cognitive variables and schooling time. One-way ANOVA and Kruskal-Wallis test were used for group comparison for demographic, neuropathological and biochemical variables. The U-Mann-Whitney (given as Z) nonparametric test was used for two group comparisons, when indicated. Correlation analysis was performed using Spearman's  $\rho$  test. Statistical significance of all analyses was determined with \*  $p \leq 0.05$ , \*\* $p \leq 0.01$  and \*\*\* $p \leq 0.001$ .

## References

1. Acosta-Baena N, Sepulveda-Falla D, Lopera-Gómez C et al. Pre-dementia clinical stages in presenilin 1 E280A familial early-onset Alzheimer's disease: a retrospective cohort study. *The Lancet Neurology* 2011; 10: 213-220.
2. Sepulveda-Falla D, Matschke J, Bernreuther C et al. Deposition of hyperphosphorylated Tau in cerebellum of PSEN1 E280A Alzheimer's Disease. *Brain Pathology* 2011; 21: 452-463
3. Tremblay C, Pilote M, Phivilay A, Emond V, Bennett D, Calon F. Biochemical characterization of A $\beta$  and Tau pathologies in mild cognitive impairment and Alzheimer's Disease. *Journal of Alzheimer's Disease* 2007; 12: 377-390.
4. Willem M, Tahirovic S, Busche MA et al.  $\eta$ -Secretase processing of APP inhibits neuronal activity in the hippocampus. *Nature* 2015; 526: 443-447.
5. Benilova I, Karran E, De Strooper B. The toxic A $\beta$  oligomer and Alzheimer's disease: an emperor in need of clothes. *Nature Neuroscience* 2012; 15: 349-357.
6. Portelius E, Tran A, Andreasson U et al. Characterization of Amyloid  $\beta$  peptides in cerebrospinal fluid by an automated immunoprecipitation procedure followed by Mass Spectrometry. *Journal of Proteome Research* 2007; 6: 4433-4439.
7. Kakuda N, Shoji M, Arai H et al. Altered  $\gamma$ -secretase activity in mild cognitive impairment and Alzheimer's disease. *EMBO Molecular Medicine* 2012; 4: 344-352.
8. Rosenberger AF, Hilhorst R, Coart E et al. Protein kinase activity decreases with higher Braak stages of Alzheimer's Disease Pathology. *Journal of Alzheimer's Disease* 2015; 49: 927-943.
9. Keshava Prasad TS, Goel R, Kandasamy K et al. Human Protein Reference Database--2009 update. *Nucleic Acids Research* 2009; 37: D767-D772.
10. Matthews L, Gopinath G, Gillespie M et al. Reactome knowledgebase of human biological pathways and processes. *Nucleic Acids Research* 2009; 37: D619-D622.
11. Vélez JI, Rivera D, Mastronardi C et al. A Mutation in DAOA modifies the age of onset in PSEN1 E280A Alzheimer's Disease. *Neural Plasticity* 2016; 2016: 1-7.
12. Johar A, Mastronardi C, Rojas-Villarraga A et al. Novel and rare functional genomic variants in multiple autoimmune syndrome and Sjögren's syndrome. *Journal of Translational Medicine* 2015; 13:173.
13. Vélez JI, Lopera F, Sepulveda-Falla D et al. APOE\*E2 allele delays age of onset in PSEN1 E280A Alzheimer's disease. *Molecular Psychiatry* 2015; 21: 916-924.
14. Xia J, Benner MJ, Hancock RE. NetworkAnalyst--integrative approaches for protein-protein interaction network analysis and visual exploration. *Nucleic Acids Res.* 2014 Jul; 42:W167-74.
15. Shannon P, Markiel A, Ozier O et al. Cytoscape: a software environment for integrated models of biomolecular interaction networks. *Genome Res.* 2003 Nov;13(11):2498-504.
16. Breuer K, Foroushani AK, Laird MR, Chen C, Sribnaia A, Lo R, Winsor GL, Hancock RE, Brinkman FS, Lynn DJ. InnateDB: systems biology of innate immunity and beyond--recent updates and continuing curation. *Nucleic Acids Res.* 2013 Jan; 41:D1228-33.
17. Liu AK, Hurry ME, Ng OT et al. Bringing CLARITY to the human brain: visualization of Lewy pathology in three dimensions. *Neuropathol Appl Neurobiol.* 2016 Oct;42(6):573-87.
18. Holmes BB, Furman JL, Mahan TE, et al. Proteopathic tau seeding predicts tauopathy in vivo. *Proc Natl Acad Sci U S A.* 2014;111(41):E4376-E4385.

19. Dujardin S, Commins C, Lathuiliere A, Beerepoot P, Fernandes AR, De Los Santos MB, Klickstein N, Corjuc DL, Corjuc BT, Dooley PM, Viode A, Oakley DH, Moore BD, Mullin K, Jean-Gilles D, Clark R, Atchison K, Moore R, Chibnik LB, Tanzi RE, Frosch MB, Serrano-Pozo A, Elwood F, Steen JA, Kennedy ME, Hyman BT. Tau molecular diversity contributes to clinical heterogeneity in Alzheimer's disease., *Nat Med.* 2020. 6(8):1256-1263.

## Tables

**Table 1. Demographic and cognitive performance according to age of onset in 122 PSEN1 E280A patients**

| Group                 | Patients | Gender (F) | ApoE2           | ApoE3                   | ApoE4  |       |  |  |  |  |  |  |
|-----------------------|----------|------------|-----------------|-------------------------|--------|-------|--|--|--|--|--|--|
| <b>Q1: Early</b>      | 33       | 72.7%      | --              | 73.3 %                  | 26.6 % |       |  |  |  |  |  |  |
| <b>Q2-Q3: Average</b> | 61       | 57.4%      | 3.6%            | 70.9 %                  | 25.5 % |       |  |  |  |  |  |  |
| <b>Q4: Late</b>       | 28       | 53.6%      | 8.0 %           | 64.0 %                  | 28.0 % |       |  |  |  |  |  |  |
|                       |          |            | X Squared 0.237 | X Squared 0.622, *(-12) |        |       |  |  |  |  |  |  |
|                       |          |            | X Squared       | <i>0.012</i>            | 0.710  | 0.934 |  |  |  |  |  |  |
| <b>Total</b>          | 122      | 60.7 %     | 3.6 %           | 70.0 %                  | 26.4 % |       |  |  |  |  |  |  |

  

| Age of Onset          |          |       |      |         | p value vs   |              |              | Schooling |      |        | p value vs   |       |              |
|-----------------------|----------|-------|------|---------|--------------|--------------|--------------|-----------|------|--------|--------------|-------|--------------|
| Group                 | Patients | Mean  | SD   | Range   | Q1           | Q2/Q3        | Q4           | Mean      | SD   | Range  | Q1           | Q2/Q3 | Q4           |
| <b>Q1: Early</b>      | 33       | 44.21 | 1.95 | 39 - 46 | --           | <i>0.000</i> | <i>0.000</i> | 6.76      | 3.99 | 1 - 16 | --           | 0.400 | <i>0.018</i> |
| <b>Q2-Q3: Average</b> | 61       | 49.18 | 1.64 | 47 - 52 | <i>0.000</i> | --           | <i>0.000</i> | 5.49      | 3.88 | 0 - 18 | 0.400        | --    | 0.261        |
| <b>Q4: Late</b>       | 28       | 56.96 | 3.79 | 53 - 70 | <i>0.000</i> | <i>0.000</i> | --           | 3.96      | 3.74 | 0 - 13 | <i>0.018</i> | 0.261 | --           |
|                       |          |       |      |         | p ANOVA      |              |              |           |      |        | p ANOVA      |       |              |
| <b>Total</b>          | 122      | 49.62 | 5.11 | 39 - 70 | <i>0.000</i> |              |              | 5.48      | 3.97 | 0 - 18 | <i>0.022</i> |       |              |

  

| MMSE                  |          |       |      |        | p value vs |       |       | Memory |      |              | p value vs |       |       |
|-----------------------|----------|-------|------|--------|------------|-------|-------|--------|------|--------------|------------|-------|-------|
| Group                 | Patients | Mean  | SD   | Range  | Q1         | Q2/Q3 | Q4    | Mean   | SD   | Range        | Q1         | Q2/Q3 | Q4    |
| <b>Q1: Early</b>      | 33       | 19.06 | 5.48 | 9 - 30 | --         | 0.384 | 0.260 | -0.47  | 0.45 | -1.20 - 0.80 | --         | 0.094 | 0.097 |
| <b>Q2-Q3: Average</b> | 61       | 17.23 | 5.57 | 6 - 27 | 0.384      | --    | 1.000 | -0.64  | 0.30 | -1.10 - 0.07 | 0.094      | --    | 1.000 |
| <b>Q4: Late</b>       | 28       | 16.61 | 5.50 | 4 - 25 | 0.260      | 1.000 | --    | -0.67  | 0.36 | -1.25 - 0.19 | 0.097      | 1.000 | --    |
|                       |          |       |      |        | p ANOVA    |       |       |        |      |              | p ANOVA    |       |       |
| <b>Total</b>          | 122      | 17.58 | 5.56 | 4 - 30 | 0.180      |       |       | -0.60  | 0.37 | -1.25 - 0.8  | 0.051      |       |       |

  

| Language              |          |       |      |              | p value vs   |       |              | Praxis |      |              | p value vs   |              |       |
|-----------------------|----------|-------|------|--------------|--------------|-------|--------------|--------|------|--------------|--------------|--------------|-------|
| Group                 | Patients | Mean  | SD   | Range        | Q1           | Q2/Q3 | Q4           | Mean   | SD   | Range        | Q1           | Q2/Q3        | Q4    |
| <b>Q1: Early</b>      | 33       | -0.36 | 0.48 | -1.46 - 0.30 | --           | 0.737 | <i>0.037</i> | -0.60  | 0.87 | -1.81 - 0.81 | --           | <i>0.036</i> | 0.080 |
| <b>Q2-Q3: Average</b> | 61       | -0.50 | 0.60 | -1.87 - 0.63 | 0.737        | --    | 0.245        | -0.99  | 0.64 | -1.81 - 0.71 | <i>0.036</i> | --           | 1.000 |
| <b>Q4: Late</b>       | 28       | -0.74 | 0.64 | -2.00 - 0.63 | <i>0.037</i> | 0.245 | --           | -1.01  | 0.62 | -1.81 - 26   | 0.080        | 1.000        | --    |
|                       |          |       |      |              | p ANOVA      |       |              |        |      |              | p ANOVA      |              |       |
| <b>Total</b>          | 122      | -0.52 | 0.59 | - 2.0 - 0.63 | <i>0.042</i> |       |              | -0.89  | 0.73 | -1.81 - 0.81 | <i>0.026</i> |              |       |

Q = quartile, F = Female, SD = Standard Deviation. \*= missing cases. Significant values are written in cursive.

**Table 2. Logistic Regression of Age of Onset and Schooling time as predictors of cognitive domains scores in PSEN1 E280A Age of Onset subgroups**

| <b>Variable</b> | <b>F</b> | <b>df</b> | <b>p</b>     | <b>R<sup>2</sup></b> | <b>Coefficient B</b> |                  | <b>Significance</b> |                  |
|-----------------|----------|-----------|--------------|----------------------|----------------------|------------------|---------------------|------------------|
|                 |          |           |              |                      | <b>Age of Onset</b>  | <b>Schooling</b> | <b>Age of Onset</b> | <b>Schooling</b> |
| MMSE            | 7.518    | 2 , 119   | <i>0.001</i> | 0.112                | -0.070               | 0.438            | 0.476               | <i>0.001</i>     |
| Memory domain   | 5.626    | 2 , 119   | <i>0.005</i> | 0.086                | -0.007               | 0.023            | 0.274               | <i>0.006</i>     |
| Language domain | 11.864   | 2 , 119   | <i>0.000</i> | 0.166                | -0.018               | 0.050            | <i>0.008</i>        | <i>0.004</i>     |
| Praxis domain   | 10.670   | 2 , 119   | <i>0.000</i> | 0.152                | -0.018               | 0.062            | 0.155               | <i>0.000</i>     |

**Table 3. Cases used for genetic, biochemical and pathological studies**

| Case | Genotype | Group/Onset | Sex | Age of Onset | Age of Death | Disease Duration | Postmortem Index | ApoE Haplotype | Histopathology | A $\beta$ Oligomers / pTau fractions | Mass Spectrometry | A $\beta$ de novo generation | Synaptic Density Analysis | Tau Kinsases analysis | Kinome Analysis | WES genetic analysis | Proteasome S20 activity | Polyubiquitinated WB and IP | pTau Seeding Assay |
|------|----------|-------------|-----|--------------|--------------|------------------|------------------|----------------|----------------|--------------------------------------|-------------------|------------------------------|---------------------------|-----------------------|-----------------|----------------------|-------------------------|-----------------------------|--------------------|
| 1    | none     | Ctrl        | F   | --           | 73           | --               | 945              | --             | -              | -                                    | -                 | +                            | -                         | +                     | -               | -                    | -                       | -                           | -                  |
| 2    | none     | Ctrl        | M   | --           | 86           | --               | 635              | --             | -              | -                                    | -                 | +                            | -                         | +                     | -               | -                    | +                       | -                           | -                  |
| 3    | none     | Ctrl        | M   | --           | 67           | --               | 880              | --             | -              | -                                    | -                 | +                            | -                         | +                     | +               | -                    | +                       | -                           | -                  |
| 4    | none     | Ctrl        | M   | --           | 61           | --               | 270              | --             | -              | -                                    | -                 | +                            | -                         | +                     | +               | -                    | +                       | -                           | -                  |
| 5    | none     | Ctrl        | M   | --           | 70           | --               | 120              | --             | -              | -                                    | -                 | +                            | -                         | +                     | +               | -                    | +                       | -                           | -                  |
| 6    | none     | SAD         | M   | NA           | 67           | --               | 558              | 3/3            | +              | +                                    | -                 | -                            | -                         | +                     | -               | -                    | -                       | -                           | -                  |
| 7    | none     | SAD         | M   | 80           | 86           | 6                | 1098             | NA             | +              | +                                    | -                 | -                            | -                         | +                     | -               | -                    | -                       | -                           | -                  |
| 8    | none     | SAD         | F   | 55           | 70           | 15               | 708              | 3/4            | +              | +                                    | -                 | -                            | -                         | +                     | -               | -                    | -                       | -                           | -                  |
| 9    | none     | SAD         | F   | 79           | 87           | 8                | 168              | 3/4            | +              | -                                    | -                 | -                            | -                         | +                     | +               | -                    | -                       | -                           | -                  |
| 10   | none     | SAD         | F   | 82           | 91           | 9                | 270              | 3/3            | +              | +                                    | +                 | -                            | -                         | +                     | +               | -                    | -                       | -                           | -                  |
| 11   | none     | SAD         | F   | 65           | 74           | 9                | 150              | 3/3            | +              | +                                    | +                 | -                            | -                         | +                     | -               | -                    | -                       | -                           | -                  |
| 12   | none     | SAD         | F   | 65           | 76           | 11               | 240              | 4/4            | +              | +                                    | +                 | -                            | -                         | +                     | +               | -                    | -                       | -                           | -                  |
| 13   | none     | SAD         | F   | 69           | 76           | 7                | 400              | 3/4            | +              | +                                    | +                 | -                            | -                         | +                     | +               | -                    | -                       | -                           | -                  |
| 14   | none     | SAD         | M   | NA           | 83           | --               | 270              | 3/2            | +              | +                                    | +                 | -                            | -                         | +                     | -               | -                    | -                       | -                           | -                  |
| 15   | none     | SAD         | F   | NA           | 61           | --               | 462              | 3/3            | +              | +                                    | +                 | -                            | -                         | +                     | +               | -                    | -                       | -                           | -                  |
| 16   | E280A    | Early-FAD   | F   | 37           | 47           | 10               | 138              | NA             | +              | +                                    | +                 | +                            | -                         | +                     | -               | -                    | +                       | +                           | -                  |
| 17   | E280A    | Early-FAD   | F   | 39           | 59           | 20               | 222              | 3/3            | +              | +                                    | +                 | +                            | +                         | +                     | +               | +                    | +                       | +                           | -                  |
| 18   | E280A    | Early-FAD   | F   | 40           | 59           | 19               | 360              | 3/3            | +              | +                                    | +                 | +                            | +                         | +                     | +               | +                    | -                       | -                           | +                  |
| 19   | E280A    | Early-FAD   | F   | 40           | 42           | 2                | 330              | 3/3            | +              | +                                    | +                 | +                            | -                         | +                     | -               | -                    | +                       | +                           | +                  |
| 20   | E280A    | Early-FAD   | F   | 42           | 50           | 8                | 450              | 3/4            | +              | +                                    | +                 | +                            | +                         | +                     | -               | +                    | -                       | -                           | +                  |
| 21   | E280A    | Early-FAD   | F   | 43           | 57           | 14               | 240              | 3/4            | +              | +                                    | +                 | +                            | -                         | +                     | -               | -                    | -                       | -                           | -                  |
| 22   | E280A    | Early-FAD   | M   | 44           | 52           | 8                | 288              | 3/3            | +              | +                                    | +                 | +                            | +                         | +                     | +               | -                    | -                       | -                           | +                  |
| 23   | E280A    | Early-FAD   | F   | 46           | 66           | 20               | 240              | 3/3            | +              | +                                    | +                 | +                            | +                         | +                     | +               | -                    | -                       | -                           | +                  |
| 24   | E280A    | Average-FAD | F   | 47           | 54           | 7                | 330              | 3/3            | +              | +                                    | +                 | +                            | +                         | +                     | +               | -                    | -                       | -                           | -                  |
| 25   | E280A    | Average-FAD | M   | 47           | 56           | 9                | 198              | 3/3            | +              | +                                    | +                 | +                            | +                         | +                     | -               | -                    | -                       | -                           | +                  |
| 26   | E280A    | Average-FAD | M   | 47           | 58           | 11               | 210              | 3/3            | +              | +                                    | +                 | +                            | +                         | +                     | +               | -                    | -                       | -                           | -                  |
| 27   | E280A    | Average-FAD | F   | 48           | 64           | 16               | 180              | 3/3            | +              | +                                    | +                 | +                            | -                         | +                     | +               | -                    | +                       | +                           | -                  |
| 28   | E280A    | Average-FAD | F   | 49           | 62           | 13               | 240              | 4/4            | +              | +                                    | +                 | +                            | +                         | +                     | +               | +                    | +                       | +                           | +                  |
| 29   | E280A    | Average-FAD | M   | 49           | 55           | 6                | 168              | 3/3            | +              | +                                    | +                 | +                            | -                         | +                     | +               | +                    | +                       | -                           | -                  |
| 30   | E280A    | Average-FAD | F   | 50           | 60           | 10               | 168              | 3/3            | +              | +                                    | +                 | +                            | +                         | +                     | -               | +                    | -                       | -                           | +                  |
| 31   | E280A    | Late-FAD    | F   | 52           | 68           | 16               | 384              | 3/3            | +              | +                                    | +                 | +                            | +                         | +                     | +               | +                    | +                       | +                           | +                  |
| 32   | E280A    | Late-FAD    | M   | 53           | 60           | 7                | 240              | 3/4            | +              | +                                    | +                 | +                            | +                         | +                     | +               | +                    | +                       | -                           | +                  |
| 33   | E280A    | Late-FAD    | M   | 54           | 63           | 9                | 330              | 3/3            | +              | +                                    | +                 | +                            | -                         | +                     | -               | +                    | +                       | +                           | +                  |
| 34   | E280A    | Late-FAD    | F   | 55           | 64           | 9                | 180              | NA             | +              | +                                    | +                 | +                            | -                         | +                     | +               | +                    | +                       | +                           | -                  |
| 35   | E280A    | Late-FAD    | M   | 56           | 63           | 7                | 228              | NA             | +              | +                                    | +                 | +                            | +                         | +                     | +               | +                    | +                       | +                           | +                  |
| 36   | E280A    | Late-FAD    | F   | 58           | 71           | 13               | 300              | 3/3            | +              | +                                    | +                 | +                            | +                         | +                     | +               | +                    | +                       | +                           | +                  |
| 37   | E280A    | Late-FAD    | F   | 58           | 70           | 12               | 192              | 3/3            | +              | +                                    | +                 | +                            | +                         | +                     | -               | +                    | +                       | +                           | +                  |
| 38   | E280A    | Late-FAD    | F   | 62           | 74           | 12               | 330              | 3/3            | +              | +                                    | +                 | +                            | -                         | +                     | +               | +                    | +                       | +                           | +                  |

**Table 4. Demographic and clinical characterization of PSEN1 E280A patients used for biochemical and pathological studies**

| Group                        | Subgroup | N  | Gender (F) | ApoE  |       |       |        | Memory Impairment | Language Impairment | Parkinsonism | Seizures / Myoclonus | Abnormal gait | Behavioral changes | Depression | Cerebellar Signs | Headache | Sleep Disorder |
|------------------------------|----------|----|------------|-------|-------|-------|--------|-------------------|---------------------|--------------|----------------------|---------------|--------------------|------------|------------------|----------|----------------|
|                              |          |    |            | ApoE2 | ApoE3 | ApoE4 | NA     |                   |                     |              |                      |               |                    |            |                  |          |                |
| Control                      |          | 5  | 20.0%      | --    | --    | --    | 100.0% |                   |                     |              |                      |               |                    |            |                  |          |                |
|                              | SAD      | 10 | 70.0%      | 10.0% | 40.0% | 40.0% | 10.0%  |                   |                     |              |                      |               |                    |            |                  |          |                |
| FAD                          | Early    | 8  | 87.5%      | 0.0%  | 62.5% | 25.0% | 12.5%  | 100%              | 100%                | 87.5%        | 75%                  | 75%           | 50%                | 50%        | 50%              | 37.5%    | 25%            |
|                              | Average  | 7  | 57.1%      | 0.0%  | 85.7% | 14.3% | 0.0%   | 100%              | 100%                | 100%         | 100%                 | 71.4%         | 71.4%              | 71.4%      | 57.1%            | 28.5%    | 28.6%          |
|                              | Late     | 8  | 62.5%      | 0.0%  | 62.5% | 12.5% | 25.0%  | 100%              | 100%                | 100%         | 87.5%                | 87.5%         | 62.5%              | 62.5%      | 37.5%            | 37.5%    | 50%            |
| X <sup>2</sup> FAD subgroups |          |    | 0.747      | ----  | 0.828 | 0.813 | ----   | 1.000             | 1.000               | 0.958        | 0.874                | 0.932         | 0.866              | 0.866      | 0.855            | 0.946    | 0.660          |
| <b>Total FAD</b>             |          | 23 | 56.5%      | 0.0%  | 69.6% | 17.4% | 13.0%  | 100%              | 100%                | 95.7%        | 87%                  | 78.3%         | 60.9%              | 60.9%      | 47.8%            | 34.8%    | 34.8%          |
| X <sup>2</sup> Total         |          |    | 0.174      | 0.579 |       |       |        |                   |                     |              |                      |               |                    |            |                  |          |                |

EOFAD = Early onset FAD, AOFAD = Average onset FAD, LOFAD = Late onset FAD

**Table 5. Demographic and clinical characterization of PSEN1 E280A patients used for biochemical and pathological studies (cont.)**

| Group      | N  | Age of Onset |      |         | p value vs |       |       | Age of Death |      |              | p value vs |       |       |
|------------|----|--------------|------|---------|------------|-------|-------|--------------|------|--------------|------------|-------|-------|
|            |    | Mean         | SD   | Range   | EOFAD      | AOFAD | LOFAD | Mean         | SD   | Range        | EOFAD      | AOFAD | LOFAD |
| Control    | 5  | --           | --   | --      | --         | --    | --    | 71.40        | 9.29 | 61.0 - 86.0  | --         | --    | --    |
| SAD        | 10 | 70.71        | 9.98 | 55 - 82 | 0.000      | 0.000 | 0.000 | 77.10        | 9.60 | 61.0 - 91.0  | 0.000      | 0.000 | 0.014 |
| EOFAD      | 8  | 41.38        | 2.93 | 37 - 46 | --         | 0.021 | 0.000 | 54.00        | 7.71 | 42.0 - 66.0  | --         | 0.243 | 0.006 |
| AOFAD      | 7  | 48.14        | 1.22 | 47 - 50 | 0.021      | --    | 0.017 | 58.43        | 3.74 | 54.0 - 64.0  | 0.243      | --    | 0.070 |
| LOFAD      | 8  | 56.00        | 3.25 | 52 - 62 | 0.000      | 0.017 | --    | 66.63        | 4.84 | 60.0 - 74.00 | 0.006      | 0.070 | --    |
| <b>SAD</b> |    |              |      |         |            |       |       |              |      |              | <b>SAD</b> |       |       |
| FAD        | 23 | 48.52        | 6.74 | 37 - 62 | 0.000      |       |       | 59.39        | 8.15 | 42.0 - 74.0  | 0.000      |       |       |

  

| Group      | N  | Disease Duration |      |            | p value vs |       |       | Post Mortem Index |        |            | p value vs |       |       |
|------------|----|------------------|------|------------|------------|-------|-------|-------------------|--------|------------|------------|-------|-------|
|            |    | Mean             | SD   | Range      | EOFAD      | AOFAD | LOFAD | Mean              | SD     | Range      | EOFAD      | AOFAD | LOFAD |
| Control    | 5  | --               | --   | --         | --         | --    | --    | 570.00            | 365.19 | 120 - 945  | 1.000      | 0.291 | 1.000 |
| SAD        | 10 | 9.29             | 2.98 | 6.0 - 15.0 | 0.640      | 0.917 | 0.917 | 432.40            | 293.66 | 150 - 1098 | 1.000      | 0.313 | 1.000 |
| EOFAD      | 8  | 12.63            | 6.67 | 2.0 - 20.0 | --         | 0.851 | 0.851 | 283.50            | 95.99  | 138 - 450  | --         | 1.000 | 1.000 |
| AOFAD      | 7  | 10.29            | 3.45 | 6.0 - 16.0 | 0.851      | --    | 0.917 | 213.43            | 57.43  | 168 - 330  | 1.000      | --    | 1.000 |
| LOFAD      | 8  | 10.63            | 3.16 | 7.0 - 16.0 | 0.851      | 0.917 | --    | 273.00            | 73.55  | 180 - 384  | 1.000      | 1.000 | --    |
| <b>SAD</b> |    |                  |      |            |            |       |       |                   |        |            | <b>SAD</b> |       |       |
| FAD        | 23 | 10.83            | 4.85 | 2.0 - 21.0 | 0.471      |       |       | 258.52            | 80.64  | 138 - 450  | 0.105      |       |       |

EOFAD = Early onset FAD, AOFAD = Average onset FAD, LOFAD = Late onset FAD



**Table 6. A $\beta$  pathology according Age of Onset in PSEN1 E280A FAD**

| Group        | N  | A $\beta$ FC |          |                      | p value vs |       |       |       | A $\beta$ TC |          |                     | p value vs |       |       |       |
|--------------|----|--------------|----------|----------------------|------------|-------|-------|-------|--------------|----------|---------------------|------------|-------|-------|-------|
|              |    | Mean         | SD       | Range                | SAD        | EOFAD | AOFAD | LOFAD | Mean         | SD       | Range               | SAD        | EOFAD | AOFAD | LOFAD |
| <b>SAD</b>   | 10 | 49640.43     | 23159.40 | 23601.48 - 94648.09  | --         | 1.000 | 0.592 | 1.000 | 32218.77     | 15596.38 | 14050.03 - 61310.11 | --         | 1.000 | 1.000 | 1.000 |
| <b>EOFAD</b> | 8  | 46898.74     | 24886.81 | 5566.11 - 86473.79   | 1.000      | --    | 0.745 | 1.000 | 24702.39     | 12389.16 | 8872.41 - 43017.55  | 1.000      | --    | 0.862 | 1.000 |
| <b>AOFAD</b> | 7  | 72520.82     | 31338.13 | 41641.47 - 132282.33 | 0.592      | 0.745 | --    | 1.000 | 45871.42     | 32282.46 | 9700.86 - 102292.73 | 1.000      | 0.862 | --    | 1.000 |
| <b>LOFAD</b> | 8  | 52080.20     | 18881.42 | 31870.78 - 86457.41  | 1.000      | 1.000 | 1.000 | --    | 31691.31     | 19028.96 | 10556.61 - 72701.61 | 1.000      | 1.000 | 1.000 | --    |
| <b>SAD</b>   |    |              |          |                      | <b>SAD</b> |       |       |       |              |          |                     |            |       |       |       |
| <b>FAD</b>   | 23 | 56499.01     | 26469.46 | 5566.11 - 132282.33  | 0.368      |       |       |       | 33576.06     | 22941.31 | 8872.41 - 102292.73 | 0.845      |       |       |       |

  

| Group        | N  | A $\beta$ PC |          |                     | p value vs |       |       |       | A $\beta$ OC |          |                     | p value vs |       |       |       |
|--------------|----|--------------|----------|---------------------|------------|-------|-------|-------|--------------|----------|---------------------|------------|-------|-------|-------|
|              |    | Mean         | SD       | Range               | SAD        | EOFAD | AOFAD | LOFAD | Mean         | SD       | Range               | SAD        | EOFAD | AOFAD | LOFAD |
| <b>SAD</b>   | 10 | 25622.41     | 10909.18 | 9431.48 - 44289.94  | --         | 1.000 | 1.000 | 0.901 | 23918.61     | 11529.16 | 11192.38 - 42328.44 | --         | 1.000 | 1.000 | 1.000 |
| <b>EOFAD</b> | 8  | 29211.04     | 18660.98 | 5907.32 - 56031.67  | 1.000      | --    | 1.000 | 1.000 | 22973.07     | 8579.23  | 9019.06 - 33484.37  | 1.000      | --    | 1.000 | 1.000 |
| <b>AOFAD</b> | 7  | 34732.49     | 16038.82 | 22495.80 - 63931.73 | 1.000      | 1.000 | --    | 1.000 | 25687.44     | 11871.92 | 18184.47 - 51957.73 | 1.000      | 1.000 | --    | 1.000 |
| <b>LOFAD</b> | 8  | 38668.75     | 20145.01 | 12850.67 - 77723.37 | 0.901      | 1.000 | 1.000 | --    | 27376.87     | 12667.28 | 11603.16 - 47608.73 | 1.000      | 1.000 | 1.000 | --    |
| <b>SAD</b>   |    |              |          |                     | <b>SAD</b> |       |       |       |              |          |                     |            |       |       |       |
| <b>FAD</b>   | 23 | 34181.12     | 18068.92 | 5907.32 - 77723.37  | 0.225      |       |       |       | 25330.94     | 10793.41 | 9019.06 - 51957.73  | 0.557      |       |       |       |

  

| Group        | N  | A $\beta$ 1-42FC |          |                      | p value vs |       |       |       | N    | sAPP TBS fraction |      |             | p value vs |       |       |       |
|--------------|----|------------------|----------|----------------------|------------|-------|-------|-------|------|-------------------|------|-------------|------------|-------|-------|-------|
|              |    | Mean             | SD       | Range                | SAD        | EOFAD | AOFAD | LOFAD |      | Mean              | SD   | Range       | SAD        | EOFAD | AOFAD | LOFAD |
| <b>SAD</b>   | 10 | 103680.02        | 35775.56 | 59765.80 - 151362.60 | --         | 1.000 | 1.000 | 0.098 | 0.99 | 9                 | 0.33 | 0.34 - 1.39 | --         | 0.600 | 1.000 | 0.854 |
| <b>EOFAD</b> | 8  | 125630.29        | 37799.31 | 67822.33 - 173095.90 | 1.000      | --    | 1.000 | 1.000 | 0.74 | 8                 | 0.35 | 0.44 - 1.47 | 0.600      | --    | 0.673 | 1.000 |
| <b>AOFAD</b> | 7  | 121690.00        | 49958.36 | 80387.14 - 230689.00 | 1.000      | 1.000 | --    | 0.928 | 1.12 | 7                 | 0.49 | 0.46 - 1.81 | 1.000      | 0.673 | --    | 0.931 |
| <b>LOFAD</b> | 8  | 148122.87        | 35426.46 | 90700.15 - 188479.70 | 0.098      | 1.000 | 0.928 | --    | 0.76 | 8                 | 0.28 | 0.38 - 1.10 | 0.854      | 1.000 | 0.931 | --    |
| <b>SAD</b>   |    |                  |          |                      | <b>SAD</b> |       |       |       |      |                   |      |             |            |       |       |       |
| <b>FAD</b>   | 23 | 132254.58        | 40959.25 | 67822.33 - 230689.00 | 0.055      |       |       |       | 0.86 | 23                | 0.40 | 0.38 - 1.81 | 0.187      |       |       |       |

| Group        | N  | A $\beta$ Monomers TBS fraction |       |               | p value vs   |       |       |       | A $\beta$ small Oligomers TBS fraction |       |               | p value vs   |       |       |       |
|--------------|----|---------------------------------|-------|---------------|--------------|-------|-------|-------|----------------------------------------|-------|---------------|--------------|-------|-------|-------|
|              |    | Mean                            | SD    | Range         | SAD          | EOFAD | AOFAD | LOFAD | Mean                                   | SD    | Range         | SAD          | EOFAD | AOFAD | LOFAD |
| <b>SAD</b>   | 9  | 59.23                           | 11.42 | 44.47 – 81.49 | --           | 1.000 | 0.084 | 0.017 | 40.77                                  | 11.42 | 18.51 – 55.53 | --           | 1.000 | 0.084 | 0.017 |
| <b>EOFAD</b> | 8  | 53.14                           | 7.96  | 40.45 – 62.03 | 1.000        | --    | 0.588 | 0.198 | 46.86                                  | 7.96  | 37.98 – 59.56 | 1.000        | --    | 0.588 | 0.198 |
| <b>AOFAD</b> | 7  | 41.46                           | 14.44 | 25.59 – 65.80 | 0.084        | 0.588 | --    | 1.000 | 58.54                                  | 14.44 | 34.19 – 74.41 | 0.084        | 0.588 | --    | 1.000 |
| <b>LOFAD</b> | 8  | 38.05                           | 12.07 | 18.71 – 56.76 | 0.017        | 0.198 | 1.000 | --    | 61.95                                  | 12.08 | 43.24 – 81.29 | 0.017        | 0.198 | 1.000 | --    |
| <b>SAD</b>   |    |                                 |       |               | <b>SAD</b>   |       |       |       |                                        |       |               |              |       |       |       |
| <b>FAD</b>   | 23 | 44.33                           | 12.98 | 18.71 – 65.80 | <i>0.010</i> |       |       |       | 55.67                                  | 12.98 | 34.20 – 81.29 | <i>0.010</i> |       |       |       |

| Group        | N  | A $\beta$ 1-42 |       |                | p value vs   |       |              |       | A $\beta$ 2 - 42 |      |              | p value vs   |       |       |       |
|--------------|----|----------------|-------|----------------|--------------|-------|--------------|-------|------------------|------|--------------|--------------|-------|-------|-------|
|              |    | Mean           | SD    | Range          | SAD          | EOFAD | AOFAD        | LOFAD | Mean             | SD   | Range        | SAD          | EOFAD | AOFAD | LOFAD |
| <b>SAD</b>   | 6  | 44.05          | 31.01 | 22,98 - 104,70 | --           | 0.388 | <i>0.048</i> | 0.233 | 5.80             | 2.11 | 2,88 - 9,02  | --           | 1.000 | 0.111 | 0.641 |
| <b>EOFAD</b> | 8  | 19.62          | 12.44 | 2,21 - 40,33   | 0.388        | --    | 1.000        | 1.000 | 4.23             | 2.83 | 1,08 - 9,35  | 1.000        | --    | 1.000 | 1.000 |
| <b>AOFAD</b> | 7  | 12.19          | 9.55  | 2,38 - 26,04   | <i>0.048</i> | 1.000 | --           | 1.000 | 2.35             | 1.45 | ,80 - 4,47   | 0.111        | 1.000 | --    | 1.000 |
| <b>LOFAD</b> | 8  | 29.05          | 41.11 | 0,00 - 124,87  | 0.233        | 1.000 | 1.000        | --    | 4.19             | 4.41 | 0,00 - 13,60 | 0.641        | 1.000 | 1.000 | --    |
| <b>SAD</b>   |    |                |       |                | <b>SAD</b>   |       |              |       |                  |      |              |              |       |       |       |
| <b>FAD</b>   | 23 | 20.64          | 25.70 | 0,00 - 124,87  | <i>0.010</i> |       |              |       | 3.64             | 3.17 | 0,00 - 13,60 | <i>0.046</i> |       |       |       |

| Group        | N  | A $\beta$ 4-42 |       |               | p value vs |       |       |       | A $\beta$ 5 - 42 |      |             | p value vs |       |       |       |
|--------------|----|----------------|-------|---------------|------------|-------|-------|-------|------------------|------|-------------|------------|-------|-------|-------|
|              |    | Mean           | SD    | Range         | SAD        | EOFAD | AOFAD | LOFAD | Mean             | SD   | Range       | SAD        | EOFAD | AOFAD | LOFAD |
| <b>SAD</b>   | 6  | 51.60          | 43.42 | 6,79 - 117,45 | --         | 1.000 | 0.615 | 1.000 | 4.38             | 1.87 | 1,63 - 6,77 | --         | 1.000 | 0.172 | 0.807 |
| <b>EOFAD</b> | 8  | 35.74          | 38.08 | 2,51 - 115,96 | 1.000      | --    | 1.000 | 1.000 | 3.12             | 2.18 | 0,00 - 6,59 | 1.000      | --    | 1.000 | 1.000 |
| <b>AOFAD</b> | 7  | 0.87           | 0.84  | ,82 - 50,31   | 0.615      | 1.000 | --    | 1.000 | 4.58             | 2.83 | 0,00 - 3,95 | 0.172      | 1.000 | --    | 1.000 |
| <b>LOFAD</b> | 8  | 35.77          | 41.85 | 0,00 - 124,67 | 1.000      | 1.000 | 1.000 | --    | 2.75             | 2.62 | 0,00 - 6,58 | 0.807      | 1.000 | 1.000 | --    |
| <b>SAD</b>   |    |                |       |               | <b>SAD</b> |       |       |       |                  |      |             |            |       |       |       |
| <b>FAD</b>   | 23 | 30.37          | 34.72 | 0,00 - 124,67 | 0.178      |       |       |       | 2.61             | 2.15 | 0,00 - 6,59 | 0.052      |       |       |       |

| Group       | N  | A $\beta$ 1-43          |       |             | p value vs |            |       |       | A $\beta$ Pyr 3-42 |                         |              | p value vs |       |            |            | LOFAD |       |  |  |
|-------------|----|-------------------------|-------|-------------|------------|------------|-------|-------|--------------------|-------------------------|--------------|------------|-------|------------|------------|-------|-------|--|--|
|             |    | Mean                    | SD    | Range       | SAD        | EOFAD      | AOFAD | LOFAD | Mean               | SD                      | Range        | SAD        | EOFAD | AOFAD      |            |       |       |  |  |
| SAD         | 6  | 1.76                    | 0.78  | 1,21 - 3,18 | --         | 1.000      | 1.000 | 1.000 | 10.99              | 3.38                    | 5,01 - 14,85 | --         | 1.000 | 0.154      | 0.994      |       |       |  |  |
| EOFAD       | 8  | 1.55                    | 0.86  | 0,00 - 2,90 | 1.000      | --         | 1.000 | 1.000 | 7.82               | 5.41                    | 1,75 - 16,54 | 1.000      | --    | 1.000      | 1.000      |       |       |  |  |
| AOFAD       | 7  | 18.07                   | 20.74 | 0,00 - 1,74 | 1.000      | 1.000      | --    | 1.000 | 1.86               | 1.50                    | 1,49 - 8,15  | 0.154      | 1.000 | --         | 1.000      |       |       |  |  |
| LOFAD       | 8  | 1.33                    | 1.64  | 0,00 - 4,58 | 1.000      | 1.000      | 1.000 | --    | 8.05               | 7.34                    | 0,00 - 22,11 | 0.994      | 1.000 | 1.000      | --         |       |       |  |  |
| <b>SAD</b>  |    |                         |       |             | <b>SAD</b> |            |       |       |                    |                         |              |            |       |            |            |       |       |  |  |
| FAD         | 23 | 1.26                    | 1.17  | 0,00 - 4,58 | 0.357      |            |       |       | 6.91               | 5.58                    | 0,00 - 22,11 | 0.053      |       |            |            |       |       |  |  |
| Group       | N  | A $\beta$ Pyr 11-42     |       |             | p value vs |            |       |       |                    |                         |              |            |       |            |            |       |       |  |  |
|             |    | Mean                    | SD    | Range       | SAD        | EOFAD      | AOFAD | LOFAD |                    |                         |              |            |       |            |            |       |       |  |  |
| SAD         | 6  | 2.32                    | 1.00  | ,91 - 3,77  | --         | 1.000      | 0.834 | 1.000 |                    |                         |              |            |       |            |            |       |       |  |  |
| EOFAD       | 8  | 2.59                    | 2.27  | 0,00 - 7,08 | 1.000      | --         | 1.000 | 1.000 |                    |                         |              |            |       |            |            |       |       |  |  |
| AOFAD       | 7  | 1.31                    | 0.84  | 0,00 - 2,51 | 0.834      | 1.000      | --    | 1.000 |                    |                         |              |            |       |            |            |       |       |  |  |
| LOFAD       | 8  | 1.83                    | 1.71  | 0,00 - 5,09 | 1.000      | 1.000      | 1.000 | --    |                    |                         |              |            |       |            |            |       |       |  |  |
| <b>SAD</b>  |    |                         |       |             |            |            |       |       |                    |                         |              |            |       |            |            |       |       |  |  |
| FAD         | 23 | 1.93                    | 1.75  | 0,00 - 7,08 | 0.258      |            |       |       |                    |                         |              |            |       |            |            |       |       |  |  |
| Group       | N  | A $\beta$ de novo 42/40 |       |             |            | p value vs |       |       |                    | A $\beta$ de novo 38/42 |              |            |       | p value vs |            |       |       |  |  |
|             |    | Mean                    | SD    | Range       | Ctrl       | SAD        | EOFAD | AOFAD | LOFAD              | Mean                    | SD           | Range      | Ctrl  | SAD        | EOFAD      | AOFAD | LOFAD |  |  |
| Ctrl        | 5  | 0.13                    | 0.02  | 0.11-0.16   | --         | 1.000      | 0.119 | 0.051 | 0.263              | 4.65                    | 0.63         | 3.88-5.37  | --    | 1.000      | 0.031      | 0.022 | 0.063 |  |  |
| SAD         | 5  | 0.10                    | 0.02  | 0.07-0.12   | 1.000      | --         | 0.008 | 0.003 | 0.023              | 4.60                    | 2.55         | 1.98-8.71  | 1.000 | --         | 0.611      | 0.452 | 0.998 |  |  |
| EOFAD       | 8  | 0.19                    | 0.03  | 0.16-0.25   | 0.119      | 0.008      | --    | 1.000 | 1.000              | 2.56                    | 0.29         | 2.07-2.96  | 0.031 | 1.000      | --         | 1.000 | 1.000 |  |  |
| AOFAD       | 7  | 0.21                    | 0.04  | 0.14-0.27   | 0.051      | 0.003      | 1.000 | --    | 1.000              | 2.50                    | 0.60         | 1.69-3.40  | 0.022 | 1.000      | 1.000      | --    | 1.000 |  |  |
| LOFAD       | 8  | 0.19                    | 0.03  | 0.16-0.26   | 0.263      | 0.023      | 1.000 | 1.000 | --                 | 2.70                    | 0.58         | 1.94-3.76  | 0.063 | 1.000      | 1.000      | 1.000 | --    |  |  |
| <b>Ctrl</b> |    |                         |       |             | <b>SAD</b> |            |       |       |                    | <b>Ctrl</b>             |              |            |       |            | <b>SAD</b> |       |       |  |  |
| FAD         | 23 | 0.20                    | 0.03  | 0.14-0.27   | 0.011      | 0.000      |       |       |                    | 2.59                    | 0.49         | 1.69-3.76  | 0.002 | 0.098      |            |       |       |  |  |

**Table 7. pTau associated pathology according Age of Onset in PSEN1 E280A FAD**

| Group        | N  | pTau FC       |          |                       | p value vs   |              |              |              | pTau TC      |          |                       | p value vs |       |              |              |
|--------------|----|---------------|----------|-----------------------|--------------|--------------|--------------|--------------|--------------|----------|-----------------------|------------|-------|--------------|--------------|
|              |    | Mean          | SD       | Range                 | SAD          | EOFAD        | AOFAD        | LOFAD        | Mean         | SD       | Range                 | SAD        | EOFAD | AOFAD        | LOFAD        |
| <b>SAD</b>   | 10 | 129774.95     | 55378.25 | 50758.78 - 220860.24  | --           | 1.000        | 0.294        | 1.000        | 157137.27    | 48793.64 | 75932.61 - 235730.10  | --         | 1.000 | 1.000        | 0.153        |
| <b>EOFAD</b> | 8  | 146879.89     | 64768.40 | 31032.00 - 233794.30  | 1.000        | --           | 0.959        | 0.500        | 144414.17    | 64410.79 | 10844.79 - 205814.82  | 1.000      | --    | 1.000        | 0.315        |
| <b>AOFAD</b> | 7  | 185869.87     | 32529.29 | 142686.92 - 247643.68 | 0.294        | 0.959        | --           | <i>0.013</i> | 193653.67    | 44215.76 | 146645.03 - 264019.15 | 1.000      | 1.000 | --           | <i>0.009</i> |
| <b>LOFAD</b> | 8  | 91023.18      | 53368.54 | 13630.87 - 181075.44  | 1.000        | 0.500        | <i>0.013</i> | --           | 97869.97     | 42377.17 | 12240.99 - 166515.37  | 0.153      | 0.315 | <i>0.009</i> | --           |
| <b>SAD</b>   |    |               |          |                       | <b>SAD</b>   |              |              |              |              |          |                       |            |       |              |              |
| <b>FAD</b>   | 23 | 139317.99     | 63937.85 | 13630.87 - 247643.68  | 0.667        |              |              |              | 143210.82    | 63105.80 | 10844.79 - 264019.15  | 0.557      |       |              |              |
| Group        | N  | pTau PC       |          |                       | p value vs   |              |              |              | pTau OC      |          |                       | p value vs |       |              |              |
|              |    | Mean          | SD       | Range                 | SAD          | EOFAD        | AOFAD        | LOFAD        | Mean         | SD       | Range                 | SAD        | EOFAD | AOFAD        | LOFAD        |
| <b>SAD</b>   | 10 | 134904.72     | 42389.12 | 56254.06 - 188475.73  | --           | 1.000        | 0.148        | 0.433        | 159866.20    | 62585.12 | 104677.40 - 306055.14 | --         | 1.000 | 0.689        | 1.000        |
| <b>EOFAD</b> | 8  | 127870.86     | 79256.52 | 9174.50 - 44583.56    | 1.000        | --           | 0.108        | 0.844        | 157183.07    | 86851.81 | 19585.98 - 263194.05  | 1.000      | --    | 1.000        | 0.844        |
| <b>AOFAD</b> | 7  | 195971.69     | 31990.72 | 172630.77 - 262057.36 | 0.148        | 0.108        | --           | <i>0.001</i> | 204415.26    | 39780.00 | 144712.13 - 241160.45 | 0.689      | 1.000 | --           | 0.067        |
| <b>LOFAD</b> | 8  | 81328.62      | 45523.03 | 27188.48 - 145267.99  | 0.433        | 0.844        | <i>0.001</i> | --           | 106925.05    | 79290.51 | 15880.13 - 246252.19  | 1.000      | 0.844 | 0.067        | --           |
| <b>SAD</b>   |    |               |          |                       | <b>SAD</b>   |              |              |              |              |          |                       |            |       |              |              |
| <b>FAD</b>   | 23 | 132408.59     | 71965.25 | 9174.50 - 262057.36   | 1.000        |              |              |              | 154077.04    | 80314.00 | 15880.13 - 263194.05  | 0.754      |       |              |              |
| Group        | N  | Total Tau TBS |          |                       | p value vs   |              |              |              | Total Tau FA |          |                       | p value vs |       |              |              |
|              |    | Mean          | SD       | Range                 | SAD          | EOFAD        | AOFAD        | LOFAD        | Mean         | SD       | Range                 | SAD        | EOFAD | AOFAD        | LOFAD        |
| <b>SAD</b>   | 9  | 5.73          | 1.25     | 4.69 - 8.65           | --           | <i>0.002</i> | 0.355        | 1.000        | 7.79         | 2.94     | 3.92 - 12.24          | --         | 1.000 | 0.268        | 1.000        |
| <b>EOFAD</b> | 8  | 11.21         | 2.52     | 7.17 - 14.83          | <i>0.002</i> | --           | 0.779        | <i>0.000</i> | 9.73         | 3.65     | 5.67 - 14.27          | 1.000      | --    | 1.000        | 0.373        |
| <b>AOFAD</b> | 7  | 7.97          | 1.21     | 5.78 - 9.45           | 0.355        | 0.779        | --           | 0.086        | 10.69        | 2.69     | 8.33 - 13.93          | 0.268      | 1.000 | --           | <i>0.033</i> |
| <b>LOFAD</b> | 8  | 4.64          | 2.17     | 1.53 - 7.24           | 1.000        | <i>0.000</i> | 0.086        | --           | 6.00         | 2.31     | 2.20 - 8.73           | 1.000      | 0.373 | <i>0.033</i> | --           |
| <b>SAD</b>   |    |               |          |                       | <b>SAD</b>   |              |              |              |              |          |                       |            |       |              |              |
| <b>FAD</b>   | 23 | 7.94          | 3.43     | 1.53 - 14.83          | <i>0.046</i> |              |              |              | 8.72         | 3.50     | 2.20 - 14.27          | 0.390      |       |              |              |

| Group        | N  | S400 pTau / Total Tau TBS |      |             | p value vs |       |       |       | S400 pTau / Total Tau FA |      |             | p value vs |       |       |       |
|--------------|----|---------------------------|------|-------------|------------|-------|-------|-------|--------------------------|------|-------------|------------|-------|-------|-------|
|              |    | Mean                      | SD   | Range       | SAD        | EOFAD | AOFAD | LOFAD | Mean                     | SD   | Range       | SAD        | EOFAD | AOFAD | LOFAD |
| <b>SAD</b>   | 9  | 1.44                      | 0.61 | 0.60–2.30   | --         | 0.156 | 0.038 | 1.000 | 0.72                     | 0.33 | 0.39–1.26   | --         | 0.994 | 1.000 | 1.000 |
| <b>EOFAD</b> | 8  | 0.87                      | 0.22 | 0.39–1.15   | 0.156      | --    | 1.000 | 0.151 | 0.53                     | 0.16 | 0.37–0.87   | 0.994      | --    | 1.000 | 0.311 |
| <b>AOFAD</b> | 7  | 0.71                      | 0.37 | 0.36–1.25   | 0.038      | 1.000 | --    | 0.038 | 0.65                     | 0.15 | 0.45–0.89   | 1.000      | 1.000 | --    | 1.000 |
| <b>LOFAD</b> | 8  | 1.29                      | 0.23 | 0.85–1.66   | 1.000      | 0.151 | 0.038 | --    | 0.75                     | 0.25 | 0.35–1.06   | 1.000      | 0.311 | 1.000 | --    |
|              |    |                           |      |             | <b>SAD</b> |       |       |       |                          |      |             | <b>SAD</b> |       |       |       |
| <b>FAD</b>   | 23 | 0.93                      | 0.33 | 0.36 - 1.66 | 0.042      | --    | --    | --    | 0.64                     | 0.21 | 0.35 - 1.06 | 0.722      | --    | --    | --    |

| Group        | N  | Synaptophysin Particles Density |       |               | p value vs |       |       | Synaptophysin Particles Size |      |             | p value vs |       |       |
|--------------|----|---------------------------------|-------|---------------|------------|-------|-------|------------------------------|------|-------------|------------|-------|-------|
|              |    | Mean                            | SD    | Range         | EOFAD      | AOFAD | LOFAD | Mean                         | SD   | Range       | EOFAD      | AOFAD | LOFAD |
| <b>EOFAD</b> | 5  | 13795                           | 12102 | 2085 – 32027  | --         | 0.036 | 0.283 | 0.27                         | 0.05 | 0.22 – 0.35 | --         | 0.480 | 0.957 |
| <b>AOFAD</b> | 5  | 48003                           | 15015 | 27159 – 68421 | 0.036      | --    | 0.175 | 0.30                         | 0.02 | 0.27 – 0.32 | 0.480      | --    | 0.646 |
| <b>LOFAD</b> | 5  | 26787                           | 25135 | 2524 – 68647  | 0.283      | 0.175 | --    | 0.28                         | 0.04 | 0.22 – 0.32 | 0.957      | 0.646 | --    |
| <b>FAD</b>   | 15 | 29528                           | 17417 | 2085 – 68647  |            |       |       | 0.28                         | 0.04 | 0.22 – 0.35 |            |       |       |

**Table 8. pTau pathology comparison E-AOFAD vs LOSAD in PSEN1 E280A FAD**

| Subgroup | N  | pTau FC   |          |                      | p value vs |       | pTau TC   |          |                      | p value vs |       |
|----------|----|-----------|----------|----------------------|------------|-------|-----------|----------|----------------------|------------|-------|
|          |    | Mean      | SD       | Range                | SAD        | LOFAD | Mean      | SD       | Range                | SAD        | LOFAD |
| E-AOFAD  | 15 | 165075.21 | 54372.41 | 31032.00 - 247643.68 | 0.461      | 0.018 | 167392.60 | 59655.57 | 10844.79 - 264019.15 | 1.000      | 0.010 |

  

| Subgroup | N  | pTau PC   |          |                     | p value vs |       | pTau OC   |          |                      | p value vs |       |
|----------|----|-----------|----------|---------------------|------------|-------|-----------|----------|----------------------|------------|-------|
|          |    | Mean      | SD       | Range               | SAD        | LOFAD | Mean      | SD       | Range                | SAD        | LOFAD |
| E-AOFAD  | 15 | 159651.25 | 69398.32 | 9174.50 - 262057.36 | 0.795      | 0.009 | 179224.76 | 71026.14 | 19585.98 - 263194.05 | 0.753      | 0.065 |

| Subgroup | N  | Total Tau TBS |      |              | p value vs |       | Total Tau FA |      |              | p value vs |       |
|----------|----|---------------|------|--------------|------------|-------|--------------|------|--------------|------------|-------|
|          |    | Mean          | SD   | Range        | SAD        | LOFAD | Mean         | SD   | Range        | SAD        | LOFAD |
| E-AOFAD  | 15 | 9.70          | 2.57 | 5.78 - 14.83 | 0.001      | 0.001 | 10.18        | 3.16 | 5.67 - 14.27 | 0.079      | 0.016 |

  

| Subgroup | N  | S400 pTau / Total TBS |      |             | p value vs |       | S400 pTau / Total FA |      |             | p value vs |       |
|----------|----|-----------------------|------|-------------|------------|-------|----------------------|------|-------------|------------|-------|
|          |    | Mean                  | SD   | Range       | SAD        | LOFAD | Mean                 | SD   | Range       | SAD        | LOFAD |
| E-AOFAD  | 15 | 0.78                  | 0.28 | 0.36 - 1.25 | 0.008      | 0.003 | 0.58                 | 0.16 | 0.34 - 0.89 | 0.421      | 0.213 |

E-AOFAD = Early and average age of onset Familial AD

**Table 9. pTau-related Kinases levels according Age of Onset in PSEN1 E280A FAD**

| Group   | N  | AKT        |      |               | p value vs |       |         |       | pAKT           |      |               | p value vs |       |         |       |
|---------|----|------------|------|---------------|------------|-------|---------|-------|----------------|------|---------------|------------|-------|---------|-------|
|         |    | Mean       | SD   | Range         | Ctrl       | SAD   | E-AOFAD | LOFAD | Mean           | SD   | Range         | Ctrl       | SAD   | E-AOFAD | LOFAD |
| Ctrl    | 5  | 0.32       | 0.66 | -0.48–1.22    | --         | 0.622 | 0.117   | 0.304 | -0.35          | 0.51 | -0.68 – 0.51  | --         | 1.000 | 1.000   | 0.270 |
| SAD     | 10 | 1.28       | 1.63 | -1.16–3.77    | 0.622      | --    | 1.000   | 1.000 | -0.35          | 0.76 | -0.78 – 1.77  | 1.000      | --    | 1.000   | 0.028 |
| E-AOFAD | 15 | 1.99       | 1.82 | 0.00–7.08     | 0.117      | 1.000 | --      | 1.000 | 0.02           | 1.22 | -0.77 – 3.69  | 1.000      | 1.000 | --      | 0.131 |
| LOFAD   | 8  | 1.83       | 1.71 | 0.00–5.09     | 0.304      | 1.000 | 1.000   | --    | 0.62           | 0.85 | -0.30 – 2.19  | 0.270      | 0.028 | 0.131   | --    |
|         |    |            |      |               | Ctrl       | SAD   |         |       |                |      |               | Ctrl       | SAD   |         |       |
| FAD     | 23 | 1.93       | 1.75 | 0.00–7.08     | 0.438      | 0.875 |         |       | 0.23           | 1.12 | -0.77 – 3.69  | 0.131      | 0.352 |         |       |
| Group   | N  | pAKT Ratio |      |               | p value vs |       |         |       | GSK3β basal    |      |               | p value vs |       |         |       |
|         |    | Mean       | SD   | Range         | Ctrl       | SAD   | E-AOFAD | LOFAD | Mean           | SD   | Range         | Ctrl       | SAD   | E-AOFAD | LOFAD |
| Ctrl    | 5  | -0.48      | 0.20 | -0.62 - -0.14 | --         | 1.000 | 1.000   | 0.038 | 0.88           | 0.67 | 0.21 – 1.52   | --         | 0.213 | 0.841   | 0.017 |
| SAD     | 10 | -0.42      | 0.33 | -0.66 – 0.29  | 1.000      | --    | 1.000   | 0.006 | -0.24          | 0.63 | -1.32 – 0.47  | 0.213      | --    | 1.000   | 1.000 |
| E-AOFAD | 15 | -0.13      | 0.68 | -0.67 – 1.52  | 1.000      | 1.000 | --      | 0.079 | 0.25           | 1.22 | -1.30 – 2.38  | 0.841      | 1.000 | --      | 0.187 |
| LOFAD   | 8  | 1.06       | 1.57 | -0.25 – 4.50  | 0.038      | 0.006 | 0.079   | --    | -0.71          | 0.51 | -1.35 – 0.24  | 0.017      | 1.000 | 0.187   | --    |
|         |    |            |      |               | Ctrl       | SAD   |         |       |                |      |               | Ctrl       | SAD   |         |       |
| FAD     | 23 | 0.29       | 1.19 | -0.67 – 4.50  | 0.06       | 0.06  |         |       | -0.087         | 1.11 | -1.30 – 2.38  | 0.08       | 0.88  |         |       |
| Group   | N  | pGSK3βS9   |      |               | p value vs |       |         |       | pGSK3βS9 Ratio |      |               | p value vs |       |         |       |
|         |    | Mean       | SD   | Range         | Ctrl       | SAD   | E-AOFAD | LOFAD | Mean           | SD   | Range         | Ctrl       | SAD   | E-AOFAD | LOFAD |
| Ctrl    | 5  | 0.12       | 0.50 | -0.43 – 0.68  | --         | 1.000 | 1.000   | 1.000 | -0.47          | 0.12 | -0.67 - -0.38 | --         | 1.000 | 1.000   | 0.319 |
| SAD     | 10 | -0.32      | 0.58 | -1.05 – 0.90  | 1.000      | --    | 1.000   | 0.881 | -0.40          | 0.26 | -0.91 – -0.00 | 1.000      | --    | 1.000   | 0.496 |
| E-AOFAD | 15 | 0.17       | 1.45 | -1.04 – 3.97  | 1.000      | 1.000 | --      | 1.000 | 0.13           | 1.21 | -0.88 – 2.44  | 1.000      | 1.000 | --      | 0.313 |
| LOFAD   | 8  | 0.01       | 0.56 | -0.95 – 0.92  | 1.000      | 0.881 | 1.000   | --    | 0.54           | 1.24 | -0.70 – 2.73  | 0.319      | 0.496 | 0.313   | --    |
|         |    |            |      |               | Ctrl       | SAD   |         |       |                |      |               | Ctrl       | SAD   |         |       |
| FAD     | 23 | 0.11       | 1.20 | -1.04 -3.97   | 0.610      | 0.392 |         |       | 0.28           | 1.20 | -0.88 – 2.73  | 0.484      | 0.484 |         |       |

| Group   | N  | pGSK3βY216 |      |              | p value vs |       |         |       | pGSK3βY216 Ratio |      |              | p value vs |       |         |       |
|---------|----|------------|------|--------------|------------|-------|---------|-------|------------------|------|--------------|------------|-------|---------|-------|
|         |    | Mean       | SD   | Range        | Ctrl       | SAD   | E-AOFAD | LOFAD | Mean             | SD   | Range        | Ctrl       | SAD   | E-AOFAD | LOFAD |
| Ctrl    | 5  | 1.48       | 0.65 | 0.90 -2.46   | --         | 0.026 | 0.014   | 0.112 | 0.41             | 0.17 | 0.21 - 0.60  | --         | 0.367 | 0.133   | 1.000 |
| SAD     | 10 | -0.29      | 0.80 | -1.22 - 1.11 | 0.026      | --    | 1.000   | 1.000 | -0.31            | 0.74 | -1.23 - 0.99 | 0.367      | --    | 1.000   | 0.151 |
| E-AOFAD | 15 | -0.16      | 1.06 | -1.17 - 2.46 | 0.014      | 1.000 | --      | 1.000 | -0.33            | 1.06 | -1.19 - 2.96 | 0.133      | 1.000 | --      | 0.033 |
| LOFAD   | 8  | -0.26      | 0.39 | -0.66 - 0.36 | 0.112      | 1.000 | 1.000   | --    | 0.76             | 1.09 | -0.34 - 2.67 | 1.000      | 0.151 | 0.033   | --    |
|         |    |            |      |              | Ctrl       | SAD   |         |       |                  |      |              | Ctrl       | SAD   |         |       |
| FAD     | 23 | -0.20      | 0.88 | -1.17 - 2.46 | 0.005      | 0.754 |         |       | 0.05             | 1.17 | -1.19 - 2.96 | 0.224      | 0.411 |         |       |

| Group   | N  | MEK   |      |               | p value vs |       |         |       | pMEK  |      |              | p value vs |       |         |       |
|---------|----|-------|------|---------------|------------|-------|---------|-------|-------|------|--------------|------------|-------|---------|-------|
|         |    | Mean  | SD   | Range         | Ctrl       | SAD   | E-AOFAD | LOFAD | Mean  | SD   | Range        | Ctrl       | SAD   | E-AOFAD | LOFAD |
| Ctrl    | 5  | 0.07  | 0.66 | -0.720 - 1.10 | --         | 1.000 | 1.000   | 1.000 | 0.32  | 1.66 | -1.13 - 3.08 | --         | 1.000 | 1.000   | 1.000 |
| SAD     | 10 | -0.31 | 0.84 | -1.09 - 1.55  | 1.000      | --    | 1.000   | 0.157 | -0.14 | 0.94 | -1.11 - 1.87 | 1.000      | --    | 1.000   | 1.000 |
| E-AOFAD | 15 | -0.07 | 1.33 | -1.17 - 4.21  | 1.000      | 1.000 | --      | 0.079 | 0.11  | 0.97 | -1.08 - 2.12 | 1.000      | 1.000 | --      | 1.000 |
| LOFAD   | 8  | 0.47  | 0.48 | -0.13 - 1.28  | 1.000      | 0.157 | 0.079   | --    | -0.23 | 0.72 | -1.13 - 0.95 | 1.000      | 1.000 | 1.000   | --    |
|         |    |       |      |               | Ctrl       | SAD   |         |       |       |      |              | Ctrl       | SAD   |         |       |
| FAD     | 23 | 0.12  | 1.12 | -1.17 - 4.21  | 0.787      | 0.778 |         |       | -0.01 | 0.89 | -1.13 - 2.12 | 1.114      | 1.000 |         |       |

| Group   | N  | pMEK Ratio |      |               | p value vs |       |         |       | ERK1/2 |      |              | p value vs |       |         |       |
|---------|----|------------|------|---------------|------------|-------|---------|-------|--------|------|--------------|------------|-------|---------|-------|
|         |    | Mean       | SD   | Range         | Ctrl       | SAD   | E-AOFAD | LOFAD | Mean   | SD   | Range        | Ctrl       | SAD   | E-AOFAD | LOFAD |
| Ctrl    | 5  | -0.38      | 0.15 | -0.55 - -0.18 | --         | 0.725 | 0.425   | 0.725 | 0.06   | 0.23 | -0.18 - 0.38 | --         | 1.000 | 1.000   | 1.000 |
| SAD     | 10 | -0.07      | 0.47 | -0.56 - 0.71  | 0.725      | --    | 0.725   | 0.378 | -0.42  | 0.90 | -1.41 - 1.25 | 1.000      | --    | 1.000   | 0.129 |
| E-AOFAD | 15 | 0.42       | 1.46 | -0.51 - 4.29  | 0.425      | 0.725 | --      | 0.022 | -0.17  | 0.95 | -1.58 - 1.11 | 1.000      | 1.000 | --      | 0.329 |
| LOFAD   | 8  | -0.47      | 0.09 | -0.59 - -0.36 | 0.725      | 0.378 | 0.022   | --    | 0.81   | 1.15 | -0.91 - 2.61 | 1.000      | 0.129 | 0.329   | --    |
|         |    |            |      |               | Ctrl       | SAD   |         |       |        |      |              | Ctrl       | SAD   |         |       |
| FAD     | 23 | 0.11       | 1.24 | -0.59 -4.29   | 1.058      | 1.000 |         |       | 0.17   | 1.11 | -1.58 - 2.61 | 0.697      | 0.353 |         |       |



| Group   | N  | pERK1/2 |      |               | p value vs |       |         |       | pERK1/2 Ratio |      |               | p value vs |       |         |       |
|---------|----|---------|------|---------------|------------|-------|---------|-------|---------------|------|---------------|------------|-------|---------|-------|
|         |    | Mean    | SD   | Range         | Ctrl       | SAD   | E-AOFAD | LOFAD | Mean          | SD   | Range         | Ctrl       | SAD   | E-AOFAD | LOFAD |
| Ctrl    | 5  | -0.12   | 0.66 | -0.64 – 0.96  | --         | 1.000 | 1.000   | 0.785 | -0.30         | 0.51 | -0.70 – 0.53  | --         | 1.000 | 1.000   | 0.440 |
| SAD     | 10 | 0.15    | 1.43 | -0.75 – 3.98  | 1.000      | --    | 1.000   | 0.621 | 0.47          | 1.44 | -0.65 – 3.17  | 1.000      | --    | 1.000   | 0.019 |
| E-AOFAD | 15 | 0.27    | 0.94 | -0.90 – 2.23  | 1.000      | 1.000 | --      | 0.199 | 0.16          | 0.86 | -0.71 – 1.96  | 1.000      | 1.000 | --      | 0.003 |
| LOFAD   | 8  | -0.62   | 0.17 | -0.84 - -0.28 | 0.785      | 0.621 | 0.199   | --    | -0.70         | 0.10 | -0.84 - -0.50 | 0.440      | 0.019 | 0.003   | --    |
|         |    |         |      |               | Ctrl       | SAD   |         |       |               |      |               | Ctrl       | SAD   |         |       |
| FAD     | 23 | -0.04   | 0.87 | -0.90 – 2.23  | 1.393      | 1.000 |         |       | -0.14         | 0.80 | -0.84 – 1.96  | 0.928      | 0.580 |         |       |

| Group   | N  | CDK5  |      |              | p value vs |       |         |       | Fyn   |      |               | p value vs |       |         |       |
|---------|----|-------|------|--------------|------------|-------|---------|-------|-------|------|---------------|------------|-------|---------|-------|
|         |    | Mean  | SD   | Range        | Ctrl       | SAD   | E-AOFAD | LOFAD | Mean  | SD   | Range         | Ctrl       | SAD   | E-AOFAD | LOFAD |
| Ctrl    | 5  | 0.62  | 1.04 | -0.61 – 2.01 | --         | 0.167 | 1.000   | 1.000 | 0.51  | 0.38 | -0.00 – 1.04  | --         | 0.169 | 0.293   | 1.000 |
| SAD     | 10 | -0.62 | 0.62 | -1.31 – 0.34 | 0.167      | --    | 0.716   | 0.207 | -0.72 | 0.16 | -0.85 - -0.43 | 0.169      | --    | 1.000   | 0.001 |
| E-AOFAD | 15 | 0.07  | 1.21 | -1.37 – 2.40 | 1.000      | 0.716 | --      | 1.000 | -0.36 | 0.95 | -0.85 – 1.76  | 0.293      | 1.000 | --      | 0.002 |
| LOFAD   | 8  | 0.25  | 0.58 | -0.75 – 1.17 | 1.000      | 0.207 | 1.000   | --    | 1.27  | 0.55 | 0.49 – 2.21   | 1.000      | 0.001 | 0.002   | --    |
|         |    |       |      |              | Ctrl       | SAD   |         |       |       |      |               | Ctrl       | SAD   |         |       |
| FAD     | 23 | 0.13  | 1.03 | -1.37 – 2.40 | 0.384      | 0.091 |         |       | 0.20  | 1.14 | -0.85 – 2.21  | 0.607      | 0.208 |         |       |

| Group   | N  | mPPA2 |      |              | p value vs |       |         |       | CamKIIa |      |              | p value vs |       |         |       |
|---------|----|-------|------|--------------|------------|-------|---------|-------|---------|------|--------------|------------|-------|---------|-------|
|         |    | Mean  | SD   | Range        | Ctrl       | SAD   | E-AOFAD | LOFAD | Mean    | SD   | Range        | Ctrl       | SAD   | E-AOFAD | LOFAD |
| Ctrl    | 5  | -0.04 | 0.36 | -0.33 – 0.55 | --         | 1.000 | 1.000   | 0.607 | -0.32   | 0.93 | -1.32 – 0.94 | --         | 1.000 | 1.000   | 0.193 |
| SAD     | 10 | -0.47 | 0.63 | -1.02 – 0.36 | 1.000      | --    | 1.000   | 0.006 | -0.49   | 0.68 | -1.37 – 0.44 | 1.000      | --    | 1.000   | 0.016 |
| E-AOFAD | 15 | -0.24 | 1.19 | -1.02 – 2.47 | 1.000      | 1.000 | --      | 0.006 | -0.09   | 1.03 | -1.48 – 1.84 | 1.000      | 1.000 | --      | 0.064 |
| LOFAD   | 8  | 1.07  | 0.34 | 0.59 – 1.69  | 0.607      | 0.006 | 0.006   | --    | 0.99    | 0.74 | 0.02 – 2.19  | 0.193      | 0.016 | 0.064   | --    |
|         |    |       |      |              | Ctrl       | SAD   |         |       |         |      |              | Ctrl       | SAD   |         |       |
| FAD     | 23 | 0.21  | 1.16 |              | 0.976      | 0.191 |         |       | 0.28    | 1.06 |              | 0.294      | 0.143 |         |       |

| Group            | N  | pCamKIIa |      |              | p value vs |       |         |       | pCamKIIa Ratio |      |               | p value vs |       |         |       |
|------------------|----|----------|------|--------------|------------|-------|---------|-------|----------------|------|---------------|------------|-------|---------|-------|
|                  |    | Mean     | SD   | Range        | Ctrl       | SAD   | E-AOFAD | LOFAD | Mean           | SD   | Range         | Ctrl       | SAD   | E-AOFAD | LOFAD |
| Ctrl             | 5  | 0.36     | 0.75 | -0.45 – 1.13 | --         | 0.976 | 0.420   | 1.000 | 0.80           | 1.42 | -0.33 – 2.92  |            | 1.000 | 0.223   | 0.166 |
| SAD              | 10 | -0.34    | 0.72 | -1.11 – 1.50 | 0.976      | --    | 1.000   | 0.171 | 0.03           | 0.65 | -0.79 – 0.93  | 1.000      |       | 1.000   | 1.000 |
| E-AOFAD          | 15 | -0.28    | 1.16 | -1.37 – 1.98 | 0.420      | 1.000 | --      | 0.034 | -0.05          | 1.20 | -1.13 – 3.62  | 0.223      | 1.000 |         | 1.000 |
| LOFAD            | 8  | 0.72     | 0.78 | -0.31 – 2.10 | 1.000      | 0.171 | 0.034   | --    | -0.45          | 0.08 | -0.57 - -0.35 | 0.166      | 1.000 | 1.000   |       |
|                  |    |          |      |              | Ctrl       | SAD   |         |       |                |      |               | Ctrl       | SAD   |         |       |
| <b>Total FAD</b> | 23 | 0.07     | 1.13 | -1.37 – 2.10 | 0.769      | 0.769 |         |       | -0.19          | 0.98 | -1.13 – 3.62  | 0.036      | 0.264 |         |       |

| Group            | N  | JNK   |      |               | p value vs |       |         |       | pJNK  |      |              | p value vs |       |         |       |
|------------------|----|-------|------|---------------|------------|-------|---------|-------|-------|------|--------------|------------|-------|---------|-------|
|                  |    | Mean  | SD   | Range         | Ctrl       | SAD   | E-AOFAD | LOFAD | Mean  | SD   | Range        | Ctrl       | SAD   | E-AOFAD | LOFAD |
| Ctrl             | 5  | -0.08 | 0.67 | -0.85 – 0.65  | --         | 1.000 | 1.000   | 0.425 | -0.16 | 0.55 | -0.51 – 0.81 |            | 1.000 | 1.000   | 1.000 |
| SAD              | 10 | -0.01 | 0.62 | -1.21 – 1.09  | 1.000      | --    | 1.000   | 0.055 | -0.33 | 0.76 | -1.19 – 1.32 | 1.000      |       | 1.000   | 1.000 |
| E-AOFAD          | 15 | 0.41  | 1.34 | -1.15 – 3.27  | 1.000      | 1.000 | --      | 0.021 | 0.26  | 1.36 | -1.02 – 3.26 | 1.000      | 1.000 |         | 1.000 |
| LOFAD            | 8  | -0.71 | 0.15 | -0.88 - -0.46 | 0.425      | 0.055 | 0.021   | --    | 0.02  | 0.63 | -0.58 – 1.46 | 1.000      | 1.000 | 1.000   |       |
|                  |    |       |      |               | Ctrl       | SAD   |         |       |       |      |              | Ctrl       | SAD   |         |       |
| <b>Total FAD</b> | 23 | 0.02  | 1.20 | -1.15 – 3.27  | 0.545      | 0.741 |         |       | 0.18  | 1.14 | -1.02 – 3.26 | 0.928      | 0.480 |         |       |

| Group            | N  | pJNK Ratio |      |              | p value vs |       |         |       |
|------------------|----|------------|------|--------------|------------|-------|---------|-------|
|                  |    | Mean       | SD   | Range        | Ctrl       | SAD   | E-AOFAD | LOFAD |
| Ctrl             | 5  | -0.25      | 0.67 | -0.92 – 0.61 | --         | 1.000 | 1.000   | 1.000 |
| SAD              | 10 | -0.32      | 1.02 | -1.05 – 2.13 | 1.000      | --    | 1.000   | 0.272 |
| E-AOFAD          | 15 | 0.05       | 1.23 | -1.17 – 2.31 | 1.000      | 1.000 | --      | 0.735 |
| LOFAD            | 8  | 0.45       | 0.49 | -0.00 – 1.23 | 1.000      | 0.272 | 0.735   | --    |
|                  |    |            |      |              | Ctrl       | SAD   |         |       |
| <b>Total FAD</b> | 23 | 0.19       | 1.04 | -1.17 – 2.31 | 0.529      | 0.420 |         |       |

**Table 10. Novel significant uncommon variants after FDR and Major Haplotype analysis**

| Chr | Position  | RsID       | Gene      | Reference | F-Test P    | F-Test FDR  | Major Allele | Major Allele Frequency | Dependent Average for DD | Dependent Average for DD | Dependent Average for DD |
|-----|-----------|------------|-----------|-----------|-------------|-------------|--------------|------------------------|--------------------------|--------------------------|--------------------------|
| 11  | 7717205   |            | OVCH2     | A         | 3.28E-05    | 0.045081044 | A            | 0.642857143            | 57.6                     | ?                        | 46.88888889              |
| 21  | 11138217  | rs4041711  | ?         | G         | 0.000209775 | 0.144220563 | G            | 0.785714286            | 41.66666667              | ?                        | 53.18181818              |
| 12  | 22839785  |            | ETNK1     | A         | 0.00045173  | 0.207042897 | A            | 0.821428571            | 37                       | 43.66666667              | 54.2                     |
| 17  | 78234611  |            | RNF213    | CGGCGG    | 0.000642249 | 0.220773021 | CGGCGG       | 0.571428571            | 55.83333333              | ?                        | 46.875                   |
| 10  | 104235832 |            | TMEM180   | G         | 0.001049905 | 0.288723944 | G            | 0.714285714            | 57.5                     | ?                        | 48                       |
| 11  | 7717209   |            | OVCH2     | A         | 0.0012204   | 0.239721494 | G            | 0.714285714            | 44                       | ?                        | 53.4                     |
| 11  | 7717212   |            | OVCH2     | A         | 0.0012204   | 0.239721494 | T            | 0.714285714            | 44                       | ?                        | 53.4                     |
| 11  | 7717213   |            | OVCH2     | A         | 0.001407946 | 0.241990695 | T            | 0.785714286            | 42.66666667              | ?                        | 52.90909091              |
| 16  | 3452453   |            | ZSCAN3    | C         | 0.001650996 | 0.252235545 | C            | 0.785714286            | 60                       | 56                       | 47.8                     |
| 14  | 23300314  |            | SLC7A7    | G         | 0.001755451 | 0.219431362 | G            | 0.714285714            | 57.25                    | ?                        | 48.1                     |
| 19  | 50643184  |            | ?         | G         | 0.001755451 | 0.219431362 | G            | 0.714285714            | 57.25                    | ?                        | 48.1                     |
| 8   | 120818705 |            | TAF2      | C         | 0.002036554 | 0.233355174 | C            | 0.678571429            | 44                       | 46.33333333              | 54.875                   |
| 15  | 77092481  |            | SCAPER    | A         | 0.002423034 | 0.256282411 | A            | 0.785714286            | 43                       | ?                        | 52.81818182              |
| 19  | 871891    |            | MED16     | C         | 0.002960535 | 0.290766859 | C            | 0.642857143            | 45.4                     | ?                        | 53.66666667              |
| 14  | 23300315  |            | SLC7A7    | C         | 0.003257921 | 0.298642785 | C            | 0.571428571            | 55.4                     | 54.5                     | 46.28571429              |
| 7   | 21892043  |            | DNAH11    | T         | 0.003773076 | 0.324248749 | T            | 0.821428571            | 39.5                     | 54                       | 52.45454545              |
| 19  | 44645602  |            | ZNF234    | T         | 0.003773726 | 0.305227845 | T            | 0.75                   | 44.66666667              | 40                       | 53.6                     |
| 21  | 9911602   | rs79513382 | TEKT4P2   | A         | 0.003984601 | 0.304379276 | G            | 0.5                    | 46.85714286              | ?                        | 54.57142857              |
| 6   | 116837849 |            | TRAPPC3   | T         | 0.004605535 | 0.301552888 | T            | 0.785714286            | 58                       | ?                        | 48.72727273              |
| 9   | 136890390 |            | LINC00094 | -         | 0.004605535 | 0.301552888 | -            | 0.785714286            | 58                       | ?                        | 48.72727273              |

| Chr | Position | Identifier  | Gene   | Reference | Block # | # Haplotypes | # Haps Regressed | Full-Model P-Value |
|-----|----------|-------------|--------|-----------|---------|--------------|------------------|--------------------|
| 17  | 21320855 | rs76059352  | KCNJ12 | A         | 1050    | 4            | 3                | 0.001448249        |
| 19  | 44096026 |             | IRGQ   | C         | 1202    | 4            | 3                | 0.00155688         |
| 12  | 22839785 |             | ETNK1  | A         | 761     | 4            | 3                | 0.00568534         |
| 11  | 7716924  |             | OVCH2  | G         | 649     | 4            | 3                | 0.005779731        |
| 16  | 456238   |             | NME4   | A         | 965     | 3            | 2                | 0.005891017        |
| 17  | 76808806 | rs377310938 | USP36  | G         | 1104    | 4            | 3                | 0.007424818        |
| 8   | 31497267 |             | NRG1   | T         | 503     | 4            | 3                | 0.009874149        |

**Table 11. Top 20 Known uncommon variants, functional mutations**

| Marker          | Chr | Position  | Identifier  | Gene     | Ref | F-Test P    | F-Test FDR  | Major Allele | Major Allele Frequency | Dependent Average for DD | Dependent Average for DD | Dependent Average for DD |
|-----------------|-----|-----------|-------------|----------|-----|-------------|-------------|--------------|------------------------|--------------------------|--------------------------|--------------------------|
| 4:70807771-SNV  | 4   | 70807771  | rs10030475  | CSN1S1   | C   | 2.94E-05    | 0.16653829  | C            | 0.642857143            | 43.25                    | 46                       | 55.625                   |
| 9:86278817-SNV  | 9   | 86278817  | rs7866234   | UBQLN1   | C   | 0.000145619 | 0.412174602 | C            | 0.785714286            | 38.5                     | 47.5                     | 53.8                     |
| 22:26932150-SNV | 22  | 26932150  | rs3752523   | TPST2    | G   | 0.000213365 | 0.402618889 | G            | 0.714285714            | 43.25                    | ?                        | 53.7                     |
| 8:99030280-SNV  | 8   | 99030280  | rs2248014   | MATN2    | T   | 0.000226322 | 0.320301609 | C            | 0.642857143            | 42                       | 48                       | 56                       |
| 10:70992664-SNV | 10  | 70992664  | rs874556    | HKDC1    | C   | 0.000231071 | 0.261618347 | C            | 0.75                   | 38                       | 48.66666667              | 54.22222222              |
| 5:111545670-SNV | 5   | 111545670 | rs890757    | EPB41L4A | C   | 0.000297684 | 0.280864477 | G            | 0.785714286            | 43                       | 39.5                     | 54.5                     |
| 22:42537196-SNV | 22  | 42537196  | rs56404506  | CYP2D7P  | T   | 0.000334784 | 0.270744991 | T            | 0.714285714            | 58                       | ?                        | 47.8                     |
| 1:248789504-SNV | 1   | 248789504 | rs1892442   | OR2T11   | T   | 0.000416507 | 0.294730536 | C            | 0.785714286            | 42                       | ?                        | 53.09090909              |
| 1:46493460-SNV  | 1   | 46493460  | rs1707336   | MAST2    | T   | 0.000475257 | 0.298936825 | G            | 0.571428571            | 38.66666667              | 52.33333333              | 56                       |
| 2:202252539-SNV | 2   | 202252539 | rs2244438   | TRAK2    | G   | 0.000828321 | 0.468912785 | G            | 0.571428571            | 58.66666667              | 52.83333333              | 43.4                     |
| 15:23688944-SNV | 15  | 23688944  | rs4778531   | GOLGA6L2 | A   | 0.000867063 | 0.446222191 | A            | 0.535714286            | 55.5                     | 54                       | 46.14285714              |
| 14:24505722-SNV | 14  | 24505722  | rs8005834   | DHRS4L1  | C   | 0.000937894 | 0.442451337 | C            | 0.607142857            | 57.25                    | 53                       | 46                       |
| 6:31324931-SNV  | 6   | 31324931  | rs151341074 | HLA-B    | A   | 0.001284419 | 0.559314917 | C            | 0.607142857            | 43.5                     | 50.66666667              | 54.85714286              |
| 1:216348764-SNV | 1   | 216348764 | rs1805049   | USH2A    | C   | 0.001345451 | 0.476037471 | T            | 0.571428571            | 58.66666667              | 52.5                     | 43.8                     |
| 2:234469664-SNV | 2   | 234469664 | rs6753062   | USP40    | T   | 0.001345451 | 0.476037471 | T            | 0.571428571            | 55                       | 58.5                     | 45.42857143              |
| 7:100371114-SNV | 7   | 100371114 | rs314298    | ZAN      | C   | 0.001345451 | 0.476037471 | C            | 0.571428571            | 57                       | 52.75                    | 45.16666667              |
| 15:33359370-SNV | 15  | 33359370  | rs11072170  | FMN1     | C   | 0.001356147 | 0.451596936 | T            | 0.5                    | 41                       | 53.83333333              | 55.75                    |
| 12:68707287-SNV | 12  | 68707287  | rs2306392   | MDM1     | G   | 0.001407946 | 0.442798973 | G            | 0.785714286            | 37                       | 45.5                     | 54.55555556              |
| 8:18258316-SNV  | 8   | 18258316  | rs1208      | NAT2     | G   | 0.001492495 | 0.444684879 | A            | 0.642857143            | 38                       | 49.83333333              | 55.83333333              |
| 8:37699195-SNV  | 8   | 37699195  | rs4976898   | GPR124   | C   | 0.00157698  | 0.4463643   | G            | 0.714285714            | 42                       | 50.5                     | 53.66666667              |

**Table 12. Top 20 common variants, functional mutations**

| Marker           | Chr | Position  | Identifier | Gene    | Reference | Alternates | #Alleles (AN) | Ref/Alt | P-Values   | FDR        | Minor Allele D Frequency | Major Allele d Frequency |
|------------------|-----|-----------|------------|---------|-----------|------------|---------------|---------|------------|------------|--------------------------|--------------------------|
| 14:73957772-SNV  | 14  | 73957772  | rs10144469 | HEATR4  | A         | G          | 2             | A/G     | 1.78E-76   | 1.64E-73   | 0.42307692               | 0.57692308               |
| 6:46672943-SNV   | 6   | 46672943  | rs1051931  | PLA2G7  | A         | G          | 2             | A/G     | 1.79E-76   | 8.26E-74   | 0.07692308               | 0.92307692               |
| 18:70417396-SNV  | 18  | 70417396  | rs922999   | NETO1   | C         | T          | 2             | C/T     | 1.79E-76   | 5.51E-74   | 0.07142857               | 0.92857143               |
| 7:151680072-SNV  | 7   | 151680072 | rs6960270  | GALNTL5 | T         | C          | 2             | T/C     | 6.56E-11   | 1.51E-08   | 0.10714286               | 0.89285714               |
| 10:62551889-SNV  | 10  | 62551889  | rs2456777  | CDK1    | A         | G          | 2             | A/G     | 1.01E-09   | 1.86E-07   | 0.15384615               | 0.84615385               |
| 11:5410934-SNV   | 11  | 5410934   | rs1498467  | OR51M1  | T         | G          | 2             | T/G     | 7.56E-08   | 1.16E-05   | 0.26923077               | 0.73076923               |
| 21:46057393-SNV  | 21  | 46057393  | rs2838602  | TSPEAR  | T         | A          | 2             | T/A     | 3.00E-07   | 3.95E-05   | 0.19230769               | 0.80769231               |
| 16:1820992-SNV   | 16  | 1820992   | rs11890    | NME3    | T         | A          | 2             | T/A     | 4.17E-05   | 0.00480845 | 0.10714286               | 0.89285714               |
| 9:94486321-SNV   | 9   | 94486321  | rs10761129 | ROR2    | C         | T          | 2             | C/T     | 0.00067952 | 0.06961299 | 0.32142857               | 0.67857143               |
| X:31496350-SNV   | X   | 31496350  | rs1800280  | DMD     | C         | T          | 2             | C/T     | 0.00648595 | 0.59800426 | 0.07692308               | 0.92307692               |
| 17:66449122-SNV  | 17  | 66449122  | rs883541   | WIP1I   | G         | A          | 2             | G/A     | 0.0123     | 1          | 0.15384615               | 0.84615385               |
| 18:76753588-SNV  | 18  | 76753588  | rs7240860  | SALL3   | A         | G          | 2             | A/G     | 0.0123     | 0.94505023 | 0.21428571               | 0.78571429               |
| 2:223436607-SNV  | 2   | 223436607 | rs7185     | FARSB   | C         | T          | 2             | C/T     | 0.01284356 | 0.91090502 | 0.03571429               | 0.96428571               |
| 3:195515617-SNV  | 3   | 195515617 | rs2641776  | MUC4    | G         | C          | 2             | G/C     | 0.01284356 | 0.84584038 | 0.03571429               | 0.96428571               |
| 4:40810747-SNV   | 4   | 40810747  | rs2261167  | NSUN7   | A         | G          | 2             | A/G     | 0.01284356 | 0.78945102 | 0.03846154               | 0.96153846               |
| 11:112065434-SNV | 11  | 112065434 | rs10891338 | BCO2    | T         | C          | 2             | T/C     | 0.01284356 | 0.74011033 | 0.03571429               | 0.96428571               |
| 15:67457335-SNV  | 15  | 67457335  | rs1065080  | SMAD3   | A         | G          | 2             | A/G     | 0.01284356 | 0.69657443 | 0.03571429               | 0.96428571               |
| 16:72042682-SNV  | 16  | 72042682  | rs3213422  | DHODH   | A         | C          | 2             | A/C     | 0.01321707 | 0.67700747 | 0.32142857               | 0.67857143               |
| 19:44471209-SNV  | 19  | 44471209  | rs365745   | ZNF221  | T         | A          | 2             | T/A     | 0.02315345 | 1          | 0.10714286               | 0.89285714               |

**Table 13. Protein-protein interactions of identified genes**

| Chr | Gene     | Name                                                     | Network | with UBC                      | Others                                                         |
|-----|----------|----------------------------------------------------------|---------|-------------------------------|----------------------------------------------------------------|
| 1   | MAST2    | Microtubule-associated serine/threonine-protein kinase 2 | 1       | no                            | with APP, reconstituted complex, with GCN1L1, affinity capture |
| 1   | OR2T11   | Olfactory receptor 2T11                                  | 0       | no                            |                                                                |
| 1   | USH2A    | Usherin                                                  | 1       | no                            |                                                                |
| 2   | FARSB    | Phenylalanyl-tRNAsynthetase beta subunit                 | 1       |                               | affinity capture                                               |
| 2   | TRAK2    | Trafficking kinesin-binding protein 2                    | 1       | no                            | with ELAVL1, affinity capture, to UBC. With KCNJ2 and GSK3B    |
| 2   | USP40    | Ubiquitin carboxyl-terminal hydrolase 40                 | 1       |                               | affinity capture                                               |
| 3   | MUC4     | Mucin 4, cell surface associated                         | 0       | no                            |                                                                |
| 4   | CSN1S1   | Alpha-S1-casein                                          | 1       | no                            | with PLK1, biochemical activity, to UBC and APP                |
| 4   | NSUN7    | NOP2/Sun RNA methyltransferase family member 7           | 0       | no                            |                                                                |
| 5   | EPB41L4A | Erythrocyte membrane protein band 4.1 like 4A            | 1       | no                            | with APP, reconstituted com                                    |
| 6   | HLA-B    | Major histocompatibility complex, class I, B             | 1       |                               | affinity capture                                               |
| 6   | PLA2G7   | Phospolipase A2 group VII                                | 1       |                               | affinity capture                                               |
| 6   | TRAPPC3  | Trafficking protein particle complex subunit 3           | 1       | affinity capture              | with APP, reconstituted complex                                |
| 7   | DNAH11   | Dynein heavy chain 11, axonemal                          | 1       |                               | affinity capture                                               |
| 7   | GALNTL5  | Polypeptide N-acetylgalactosaminyltransferase like 5     | 0       | no                            |                                                                |
| 7   | ZAN      | Zonadhesin                                               | 0       | no                            |                                                                |
| 8   | GPR124   | G-protein coupled receptor 124                           | 0       | no                            | with DLG1, several methods, to UBC                             |
| 8   | MATN2    | Matrilin-2                                               | 0       | no                            |                                                                |
| 8   | NAT2     | Arylamine N-acetyltransferase 2                          | 1       | no                            | with APP, reconstituted complex                                |
| 8   | NRG1     | Pro-neuregulin-1, membrane-bound isoform                 | 1       | no                            | With LIMK1, several methods, to UBC                            |
| 8   | TAF2     | Transcription initiation factor TFIID subunit 2          | 1       |                               | affinity capture                                               |
| 9   | ROR2     | Receptor tyrosine kinase like orphan receptor 2          | 1       |                               | affinity capture                                               |
| 9   | UBQLN1   | Ubiquilin 1                                              | 1       | several methods, hit and bait | FRET as bait, PSEN1, hit complex, two hybrid (see others)      |
| 10  | CDK1     | Cyclin dependent kinase 1                                | 1       |                               | affinity capture, several methods                              |
| 10  | HKDC1    | Hexokinase domain-containing protein 1                   | 1       |                               | affinity capture                                               |
| 10  | TMEM180  | Transmembrane protein 180                                | 1       | affinity capture              | with APP, reconstituted complex                                |
| 11  | BCO2     | Beta-carotene oxygenase 2                                | 0       | no                            |                                                                |
| 11  | OR51M1   | Olfactory receptor family 51 subfamily M member 1        | 0       | no                            |                                                                |
| 11  | OVCH2    | Ovochymase-2                                             | 0       | no                            |                                                                |
| 12  | ETNK1    | Ethanolamine kinase 1                                    | 1       | affinity capture              | with UBQL1, two hybrid                                         |
| 12  | MDM1     | Nuclear protein MDM1                                     | 0       | no                            | with HDAC8, affinity capture, to UBC                           |
| 12  | UBC      | Polyubiquitin-C                                          | 1       | ----                          | With Tau, several methods                                      |

|    |          |                                                                    |   |                               |                                                               |
|----|----------|--------------------------------------------------------------------|---|-------------------------------|---------------------------------------------------------------|
| 14 | DHRS4L1  | Putative dehydrogenase/reductase SDR family member 4-like 2        | 1 |                               | affinity capture                                              |
| 14 | HEATR4   | HEAT repeat containing 4                                           | 0 | no                            |                                                               |
| 14 | PSEN1    | Presenilin-1                                                       | 1 | several methods, hit and bait | With Tau, co-fractionation                                    |
| 14 | SLC7A7   | Solute carrier family 7 member 7                                   | 0 | no                            |                                                               |
| 15 | FMN1     | Formin-1                                                           | 1 | no                            | with PRPF40A, bait, protein-peptide, to UBC                   |
| 15 | GOLGA6L2 | Golgin subfamily A member 6-like protein 2                         | 0 | no                            |                                                               |
| 15 | SCAPER   | S phase cyclin A-associated protein in ER                          | 1 |                               | affinity capture                                              |
| 15 | SMAD3    | SMAD family member 3                                               | 1 |                               | anti tagcoimmunoprecipitation                                 |
| 16 | DHODH    | Dihydroorotate dehydrogenase (quinone)                             | 1 |                               | affinity capture                                              |
| 16 | NME3     | NME/NM23 nucleoside diphosphate kinase 3                           | 1 | affinity capture              | With APP, reconstituted complex                               |
| 16 | NME4     | Nucleoside diphosphate kinase, mitochondrial                       | 1 |                               | affinity capture                                              |
| 16 | ZSCAN3   | Zinc finger protein 24                                             | 0 | no                            |                                                               |
| 17 | KCNJ12   | ATP-sensitive inward rectifier potassium channel 12                | 1 |                               | affinity capture                                              |
| 17 | MAPT     | Microtubule-associated protein Tau                                 | 1 | several methods, hit and bait | with APP, reconstituted complex, with PSEN1, co-fractionation |
| 17 | RNF213   | E3 ubiquitin-protein ligase RNF213                                 | 1 |                               | affinity capture                                              |
| 17 | USP36    | Ubiquitin carboxyl-terminal hydrolase 36                           | 1 |                               | affinity capture                                              |
| 17 | WIP1     | WD repeat domain, phosphoinositide interacting 1                   | 0 | no                            |                                                               |
| 18 | NETO1    | Neuropilin and tolloid like 1                                      | 0 | no                            |                                                               |
| 18 | SALL3    | Spalt like transcription factor 3                                  | 1 |                               | affinity capture                                              |
| 19 | IRGQ     | Immunity-related GTPase family Q protein                           | 1 | no                            | With GABARAPL2, affinity capture, to UBC                      |
| 19 | MED16    | Mediator complex subunit MED16                                     | 1 |                               | affinity capture                                              |
| 19 | ZNF221   | Zinc finger protein 221                                            | 0 | no                            |                                                               |
| 19 | ZNF234   | Zinc Finger Transcription Factor 234                               | 0 | no                            | With ELAVL1, affinity capture, to UBC.                        |
| 21 | APP      | Amyloid beta A4 protein                                            | 1 | affinity capture              | With Tau, reconstituted complex                               |
| 21 | TEKT4P2  | Tektin 4 pseudogene 2                                              | 0 | no                            |                                                               |
| 21 | TSPEAR   | Thrombospondin type laminin G domain and EAR repeats               | 0 | no                            |                                                               |
| 22 | CYP2D7P  | Cytochrome P450, family 2, subfamily D, polypeptide 7 pseudogene 1 | 0 | no                            |                                                               |
| 22 | TPST2    | Protein-tyrosine sulfotransferase 2                                | 0 | no                            |                                                               |
| X  | DMD      | Dystrophin, muscular dystrophy                                     | 1 | affinity capture              | With APP, reconstituted complex                               |

**Table 14. Significant biological pathways from protein network**

| <b>Pathway GO:BP</b>                                     | <b>Total</b> | <b>Expected</b> | <b>Hits</b> | <b>p Value</b> | <b>FDR</b> | <b>Proteins</b>                                                                                       |
|----------------------------------------------------------|--------------|-----------------|-------------|----------------|------------|-------------------------------------------------------------------------------------------------------|
| Regulation of protein metabolic process                  | 1820         | 5.62            | 15          | 0.000225       | 0.044      | UBC, DMD, UBQLN1, PSEN1, SUMO1, APP, MAST2, SMAD3, BRCA1, CDK1, ELAVL1, GABARAPL2, CUL1, NEDD4L, DLG1 |
| Protein catabolic process                                | 644          | 1.98            | 10          | 1.99E-05       | 0.0163     | UBC, PSEN1, SUMO1, SMAD3, CDK1, GABARAPL2, CUL1, NEDD4L, USP36, USP40                                 |
| Neuron development                                       | 945          | 2.91            | 10          | 0.00048        | 0.0492     | UBC, DMD, MAPT, APP, PSEN1, CDK1, DLG1, SALL3, COL1A1, MATN2                                          |
| Positive regulation of cellular component organization   | 560          | 1.72            | 9           | 4.25E-05       | 0.0174     | DMD, SUMO1, NEDD4L, DLG1, SMAD3, BRCA1, MAPT, FMN1, COL1A1                                            |
| Protein modification by small protein conjugation        | 713          | 2.2             | 9           | 0.000268       | 0.044      | UBC, UBQL1, PSEN1, SUMO1, CDK1, BRCA1, CUL1, NEDD4L, RNF213                                           |
| Cellular protein catabolic process                       | 518          | 1.6             | 8           | 0.000158       | 0.0433     | UBC, PSEN1, SUMO1, CDK1, CUL1, NEDD4L, USP36, USP40                                                   |
| Transcription initiation from RNA polymerase II promoter | 219          | 0.674           | 5           | 0.00054        | 0.0492     | UBC, SMAD3, MED16, NEDD4L, TAF2                                                                       |
| Positive regulation of cytoskeleton organization         | 110          | 0.339           | 4           | 0.000356       | 0.0487     | MAPT, SMAD3, DLG1, FMN1                                                                               |
| Pyrimidine nucleotide metabolic process                  | 50           | 0.154           | 3           | 0.000483       | 0.0492     | DHODH, NME3, NME4                                                                                     |



**Table 15. Ubiquitination, polyubiquitination and polyubiquitinated pTau according Age of Onset in PSEN1 E280A FAD**

| Group          | N  | 20S Chymotrypsin activity |          |                       | p value vs |       | N  | Poly-Ubiquitinated |      |             | p value vs |       |
|----------------|----|---------------------------|----------|-----------------------|------------|-------|----|--------------------|------|-------------|------------|-------|
|                |    | Average                   | SD       | Range                 | E-AOFAD    | LOFAD |    | Average            | SD   | Range       | E-AOFAD    | LOFAD |
| <b>Ctrl</b>    | 4  | 173056.25                 | 49135.24 | 123415.00 - 238034.00 | --         | --    |    |                    |      |             |            |       |
| <b>E-AOFAD</b> | 6  | 120305.17                 | 48861.41 | 69496.00 - 196495.00  | --         | 0.028 | 5  | 2.60               | 1.03 | 1.22 - 3.98 | --         | 0.042 |
| <b>LOFAD</b>   | 8  | 215598.88                 | 99366.75 | 110872.00 - 374125.00 | 0.028      | --    | 7  | 1.48               | 0.42 | 1.07 - 2.12 | 0.042      | --    |
| <b>FAD</b>     | 14 | 174758.71                 | 92896.94 | 69496.00 - 374125.00  |            |       | 12 | 1.95               | 0.90 | 1.07 - 3.98 |            |       |

  

| Group          | N  | IP pTau S400/Tau |      |             | p value vs |       | IP pTau S422/Tau |      |             | p value vs |       |
|----------------|----|------------------|------|-------------|------------|-------|------------------|------|-------------|------------|-------|
|                |    | Average          | SD   | Range       | E-AOFAD    | LOFAD | Average          | SD   | Range       | E-AOFAD    | LOFAD |
| <b>E-AOFAD</b> | 5  | 0.93             | 0.11 | 0.78 - 1.08 | --         | 0.570 | 1.11             | 0.18 | 0.93 - 1.31 | --         | 0.004 |
| <b>LOFAD</b>   | 7  | 1.04             | 0.25 | 0.74 - 1.33 | 0.570      | --    | 0.76             | 0.12 | 0.58 - 0.90 | 0.004      | --    |
| <b>FAD</b>     | 12 | 0.99             | 0.20 | 0.74 - 1.33 |            |       | 0.91             | 0.23 | 0.58 - 1.31 |            |       |

  

| Group           | N  | pTau Seeding Frontal Cortex |       |             | p value vs |       |         |       | pTau Seeding Temporal Cortex |       |             | p value vs |       |         |       |
|-----------------|----|-----------------------------|-------|-------------|------------|-------|---------|-------|------------------------------|-------|-------------|------------|-------|---------|-------|
|                 |    | Average                     | SD    | Range       | Ctrl       | SAD   | E-AOFAD | LOFAD | Average                      | SD    | Range       | Ctrl       | SAD   | E-AOFAD | LOFAD |
| <b>(-) Ctrl</b> | 2  | 0.00                        | 0.003 | 0.00 - 0.00 | --         | 0.004 | 0.000   | 0.000 | 0.00                         | 0.000 | 0.00 - 0.00 | --         | 0.201 | 0.031   | 0.034 |
| <b>SAD</b>      | 2  | 1.00                        | 0.000 | 1.00 - 1.00 | 0.004      | --    | 0.012   | 0.473 | 1.00                         | 0.000 | 1.00 - 1.00 | 0.201      | --    | 0.737   | 0.737 |
| <b>E-AOFAD</b>  | 5  | 1.65                        | 0.323 | 1.29 - 2.14 | 0.000      | 0.012 | --      | 0.012 | 1.37                         | 0.380 | 1.08 - 2.02 | 0.031      | 0.737 | --      | 0.831 |
| <b>LOFAD</b>    | 5  | 1.14                        | 0.121 | 0.95 - 1.27 | 0.000      | 0.473 | 0.012   | --    |                              |       | 0.49 - 2.19 | 0.034      | 0.737 | 0.831   | --    |
| <b>FAD</b>      | 10 | 1.40                        | 0.222 | 0.95 - 2.14 | 0.004      | 0.295 |         |       | 1.34                         | 0.485 | 0.49 - 2.19 | 0.007      | 0.342 |         |       |

**Table 16. Primary antibodies used in the study**

| Antigen (name)                         | kDa   | Type       | Host   | Isotype | Immunogen / Epitope                                             | Brand/Provider  | Reference    | Application (Dilution)    | Specificity | Method  |
|----------------------------------------|-------|------------|--------|---------|-----------------------------------------------------------------|-----------------|--------------|---------------------------|-------------|---------|
| Anti-APP (6E10)                        | 4-110 | Monoclonal | Mouse  | IgG1    | Amino acid residue 1-16 of beta amyloid                         | Covance         | SIG-39320    | WB(1:1000),<br>IHC(1:100) | H           | IHC, WB |
| Anti-Abeta 1-42                        | 4-110 | Monoclonal | Mouse  |         |                                                                 | Jansen          | JRF/cAb42/26 | IHC(1:100)                | H           | IHC     |
| Anti-pTau (AT8)                        | 37-46 | Monoclonal | Mouse  | IgG1    | Amino-acids. around phosphorylated Serine 202 and Threonine 205 | Thermo          | MN1020       | IHC (1:1500)              | H, M, R, O  | IHC     |
| Anti-Tau (Tau)                         | 37-46 | Monoclonal | Mouse  | IgG1    | Purified microtubule associated proteins                        | Thermo          | MA1-26600    | WB(1:1000)                | H, M, R, O  | WB      |
| Anti-pTau (Ser400)                     | 37-46 | Polyclonal | Rabbit | IgG     | Amino acid residue Ser400                                       | Thermo          | PA1-26693    | WB(1:1000)                | H           | WB      |
| Anti-pTau (Ser422)                     | 37-46 | Polyclonal | Rabbit | IgG     | Amino acid residue Ser422                                       | Thermo          | OPA1-03151   | WB(1:1000)                | H, M,R, O   | WB      |
| Anti-AKT (4OD4)                        | 60    | Monoclonal | Mouse  | IgG1    | C-Terminal                                                      | Cell Signaling  | 2920         | WB(1:1000)                | H, M, R, O  | WB      |
| Anti-pAkt (Ser473) (D9E)               | 60    | Monoclonal | Rabbit | IgG1    | Amino acid residue Ser473                                       | Cell Signaling  | 4060         | WB(1:1000)                | H, M, R, O  | WB      |
| Anti-pGSK-3β (Ser9) (5B3)              | 46    | Monoclonal | Rabbit | IgG     | Amino acid residue Ser9                                         | Cell Signaling  | 9323         | WB(1:1000)                | H, M, R, O  | WB      |
| Anti-pGSK-3β (Y216) Clone 13A          | 46    | Monoclonal | Mouse  | IgG1    | Rat GSK-3β (pY216) Peptide                                      | BD Biosciences  | 612313       | WB(1:1000)                | H, M, R, O  | WB      |
| Anti-GSK-3β (27C10)                    | 46    | Monoclonal | Rabbit | IgG     | Full length                                                     | Cell Signaling  | 9315         | WB(1:1000)                | H, M, R, O  | WB      |
| Anti-pMEK1/2(Ser217/221)               | 45    | Polyclonal | Rabbit | IgG     | Residues surrounding Ser217/221 of H-MEK1/2.                    | Cell Signaling  | 9121         | WB(1:1000)                | H, M, R, O  | WB      |
| Anti-MEK1/2 (L38C12)                   | 45    | Monoclonal | Mouse  | IgG1    | Full length                                                     | Cell Signaling  | 4694         | WB(1:1000)                | H, M, R, O  | WB      |
| Anti-pERK1/2 (Thr202/Tyr204) (E10)     | 42/44 | Monoclonal | Mouse  | IgG1    | Residues surrounding Thr202/Tyr204                              | Cell Signaling  | 9106         | WB(1:1000)                | H, M, R, O  | WB      |
| Anti- ERKk1/2                          | 42/44 | Polyclonal | Rabbit | IgG     | C-Terminal                                                      | Cell Signaling  | 9102         | WB(1:1000)                | H, M, R, O  | WB      |
| Anti-pCaMKIIa                          | 52,5  | Polyclonal | Rabbit | IgG     | Residues surrounding Thr286 of H- CaMKII                        | Cell Signaling  | 3361         | WB(1:1000)                | H, M, R, O  | WB      |
| Anti-CaMKIIa                           | 52,5  | Monoclonal | Mouse  | IgG2a   | Purified rat brain CaM Kinase.                                  | Invitrogen      | 137300       | WB(1:1000)                | H, M, R, O  | WB      |
| Anti-pJNK                              | 46-54 | Polyclonal | Rabbit | IgG     | Residues surrounding Thr183/Tyr185 of H-SAPK/JNK                | Cell Signalling | 9255         | WB(1:1000)                | H, M, R, O  | WB      |
| Anti-JNK                               | 46-54 | Polyclonal | Rabbit | IgG     | Recombinant human JNK2 fusion protein                           | Cell Signalling | 9252S        | WB(1:1000)                | H, M, R, O  | WB      |
| Anti-CDK5                              | 30    | Polyclonal | Rabbit | IgG     | Full length                                                     | Cell Signaling  | 2506         | WB(1:1000)                | H, M, R, O  | WB      |
| Anti-Fyn                               | 59    | Polyclonal | Rabbit | IgG     | Residues surrounding Ser25                                      | Cell Signaling  | 4023         | WB(1:1000)                | H, M        | WB      |
| Anti-methyl-PP2A (2A10)                | 36    | Monoclonal | Mouse  | IgG1    | Methylated form of PP2A, catalytic subunit                      | Millipore       | 04-1479      | WB(1:1000)                | H, M, R, O  | WB      |
| Anti-GAPDH                             | 38    | Monoclonal | Mouse  | IgG1    | GAPDH from rabbit muscle.                                       | Millipore       | MAB 374      | WB(1:100 -<br>300)        | H, M, R, O  | WB      |
| Anti-mono and Polyubiquitin conjugates | > 8,5 | Monoclonal | Mouse  | IgG1    | (FK2) Poly -ubiquitinylatedlysozyme                             | Enzo life Sci.  | BML-PW8810   | WB(1:1000)                | H, M, R, O  | WB, IP  |
| Anti-Synaptophysin (YE269)             | NA    | Monoclonal | Rabbit | IgG     | Human Synaptophysin aa 250 to C-terminus                        | Abcam           | 32127        | IF (1:50)                 | H, M, R, O  | IF      |

**Table 17. Secondary antibodies used in the study**

| Antigen (Name)  | Host | Isotype   | Brand/Provider | Reference | Application (Dilution) | Specificity | Method |
|-----------------|------|-----------|----------------|-----------|------------------------|-------------|--------|
| Anti-Mouse-HRP  | Goat | IgG (H+L) | Invitrogen     | G21040    | WB(1:2500)             | Mouse       | WB     |
| Anti-Rabbit-HRP | Goat | IgG (H+L) | Invitrogen     | G21234    | WB(1:2500)             | Rabbit      | WB     |

WB: Western blot

IHC: Immunohistochemistry

Human, Mouse, Rat, Others: H, M, R, O

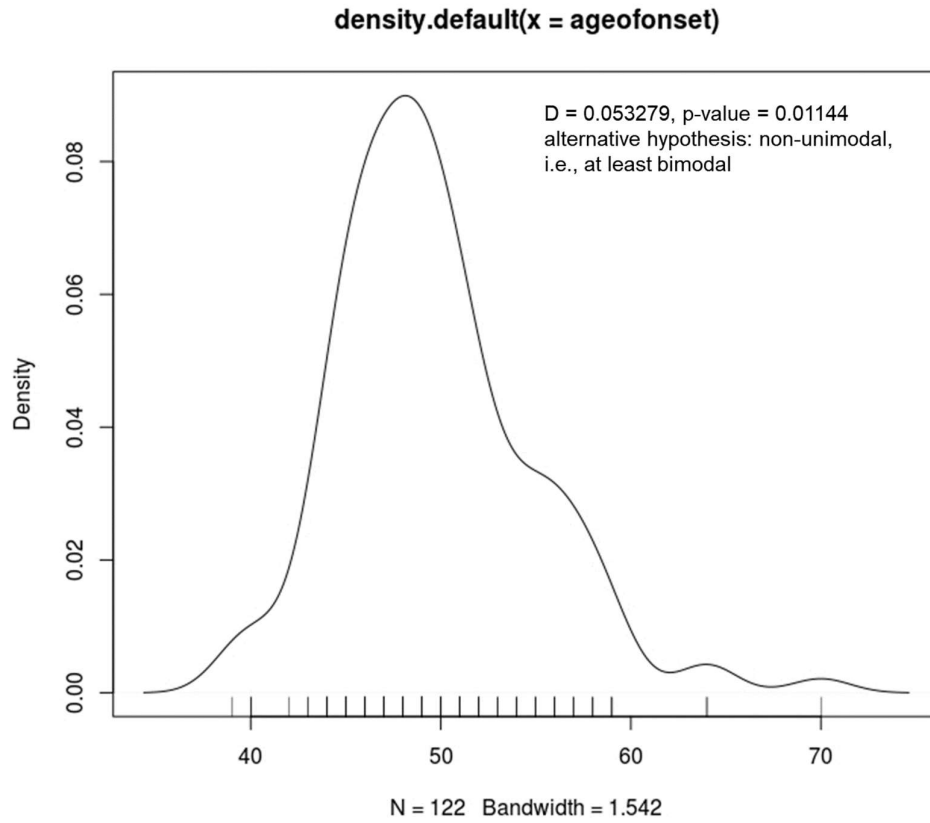

**Figure 1. AoO distribution in PSEN1 E280A.** Unimodality Hartigan's dip test for AoO in 122 PSEN1 E280A dementia patients. p value < 0.05 indicates multimodal distribution.

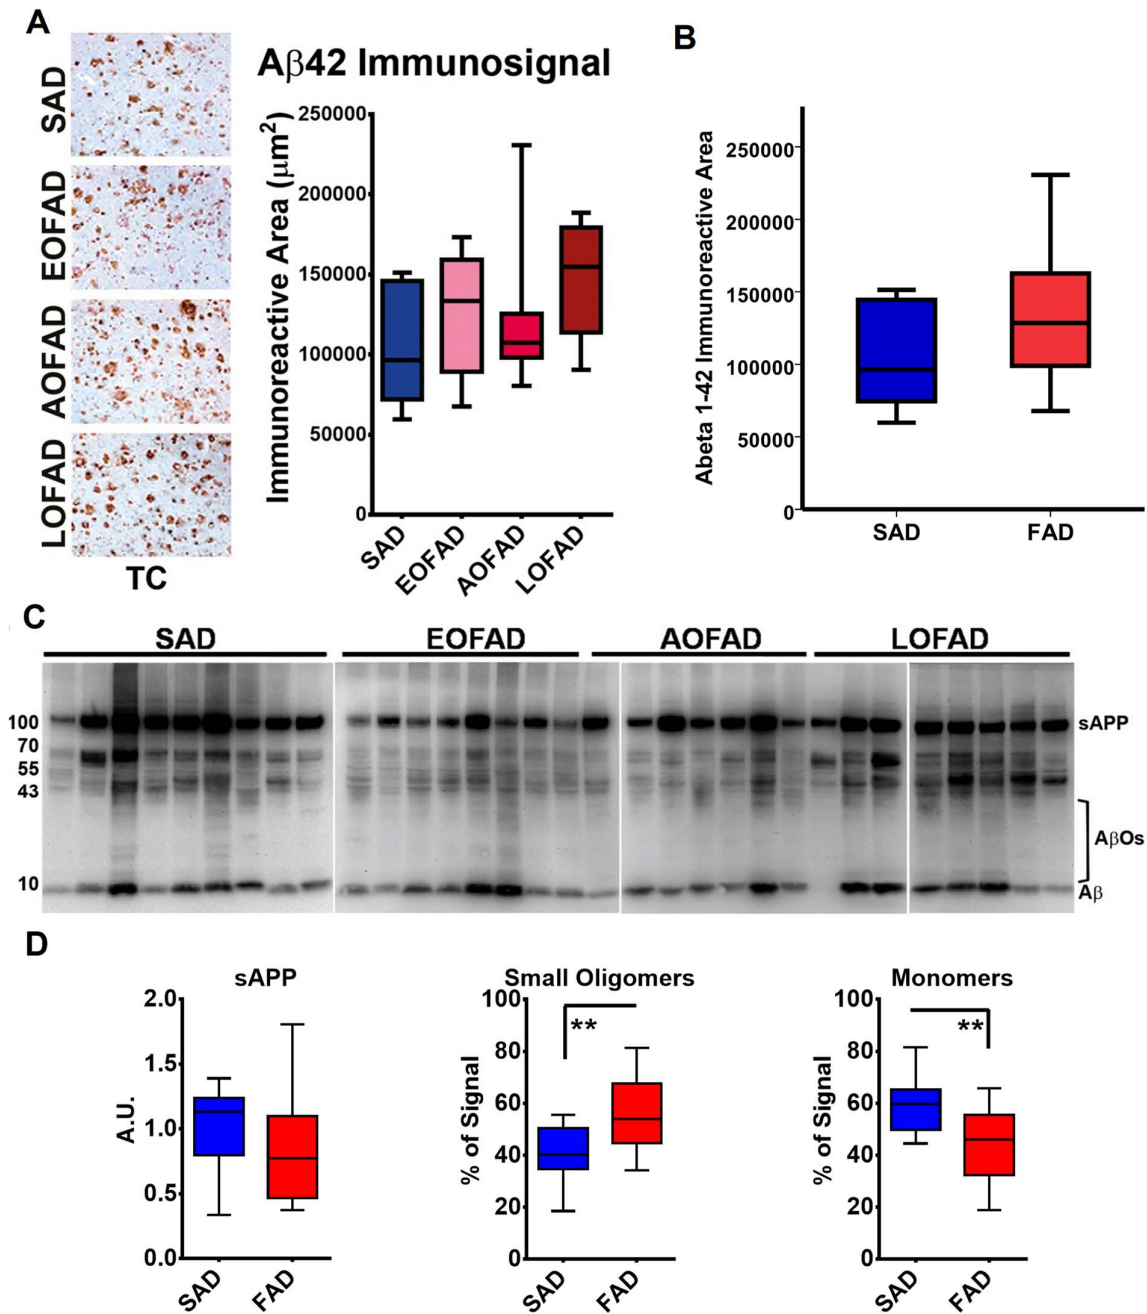

**Figure 2.  $A\beta$  pathology in AD cases.** A. Quantification of Ab 1-42 plaque loads present in frontal cortex. There were not significant differences between groups. B. Quantification of Ab 1-42 plaque load in temporal cortex in SAD patients (n=10) vs PSEN1 E280A FAD patients (n=23). There is not significant differences between groups. C. **Densitometric analysis of sAPP, small Ab oligomers and Ab monomers.** Semi denaturing electrophoresis of TBS soluble fractions from temporal cortex in SAD patients (n=10) vs PSEN1 E280A FAD patients (n=23) were blotted with 6E10 antibody and analyzed according to their band distribution in kDa. D. Densitometric analysis scatterplots for sAPP, small  $A\beta$ Os and  $A\beta$  monomers. There are not significant differences between groups for sAPP, both oligomers and monomers show differences between SAD and FAD patients (\*\*= $p \leq 0.01$ ).

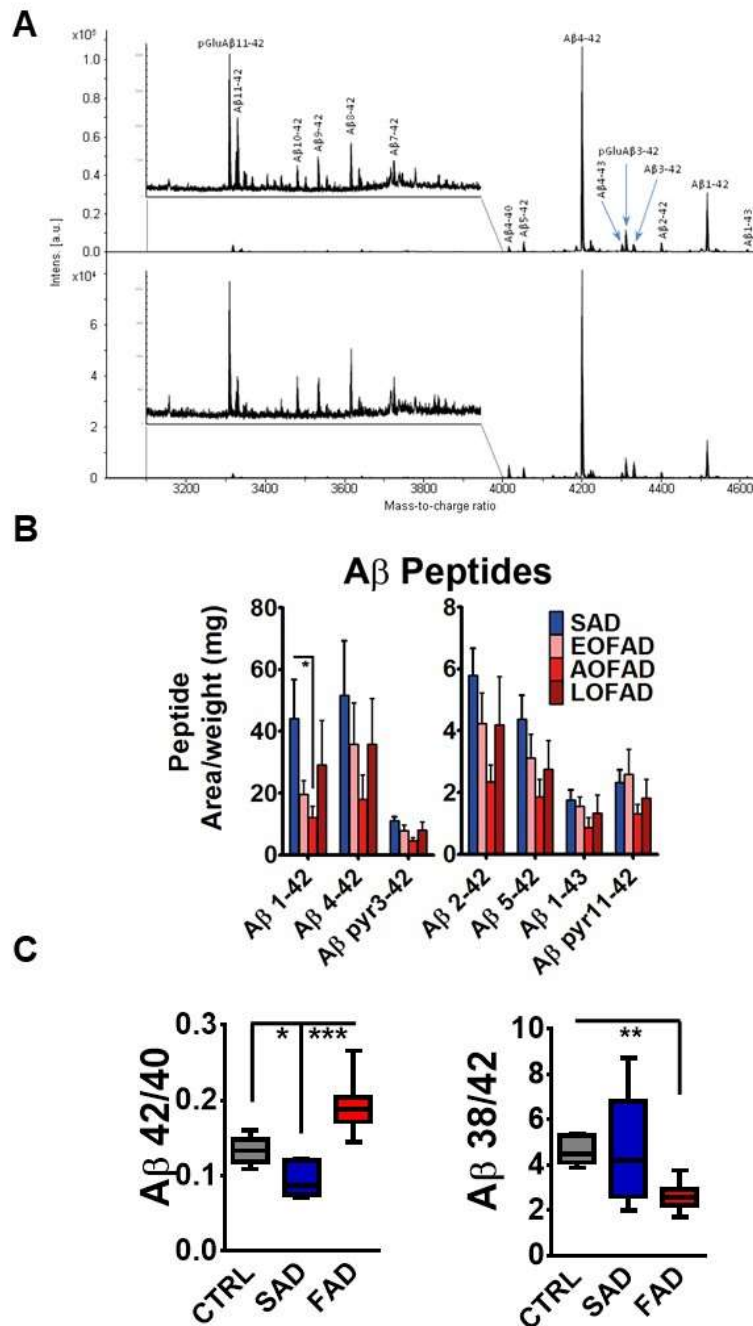

**Figure 3. Aβ peptides and enzymatic turnover of gamma secretase of SAD and FAD cases.** A. Mass Spect profile of Aβ peptides found in temporal cortex of PSEN1 E280A FAD patients. B. Graph bars depicting Aβ peptides levels as evaluated by mass spectrometry analysis on temporal cortex from SAD (n=10), EOFAD (n=8), AOFAD (n=7) and LOFAD (n=8) cases. Bars depict means +/- SEM. There were not significant differences between AoO FAD groups. SAD cases presented significantly higher levels of Aβ 1-42 compared with AOFAD cases (\* =  $p \leq 0.05$ ). C. Significantly increased ratio of de novo generated 42/40 Aβ peptides in PSEN1E280A FAD patients (n=23) when compared to Control (n=5) and SAD cases (n=5). Significantly decreased ratio of de novo 38/42 Aβ peptides when compared to Control cases. (\*\* =  $p \leq 0.01$ , \*\*\* =  $p \leq 0.001$ ).

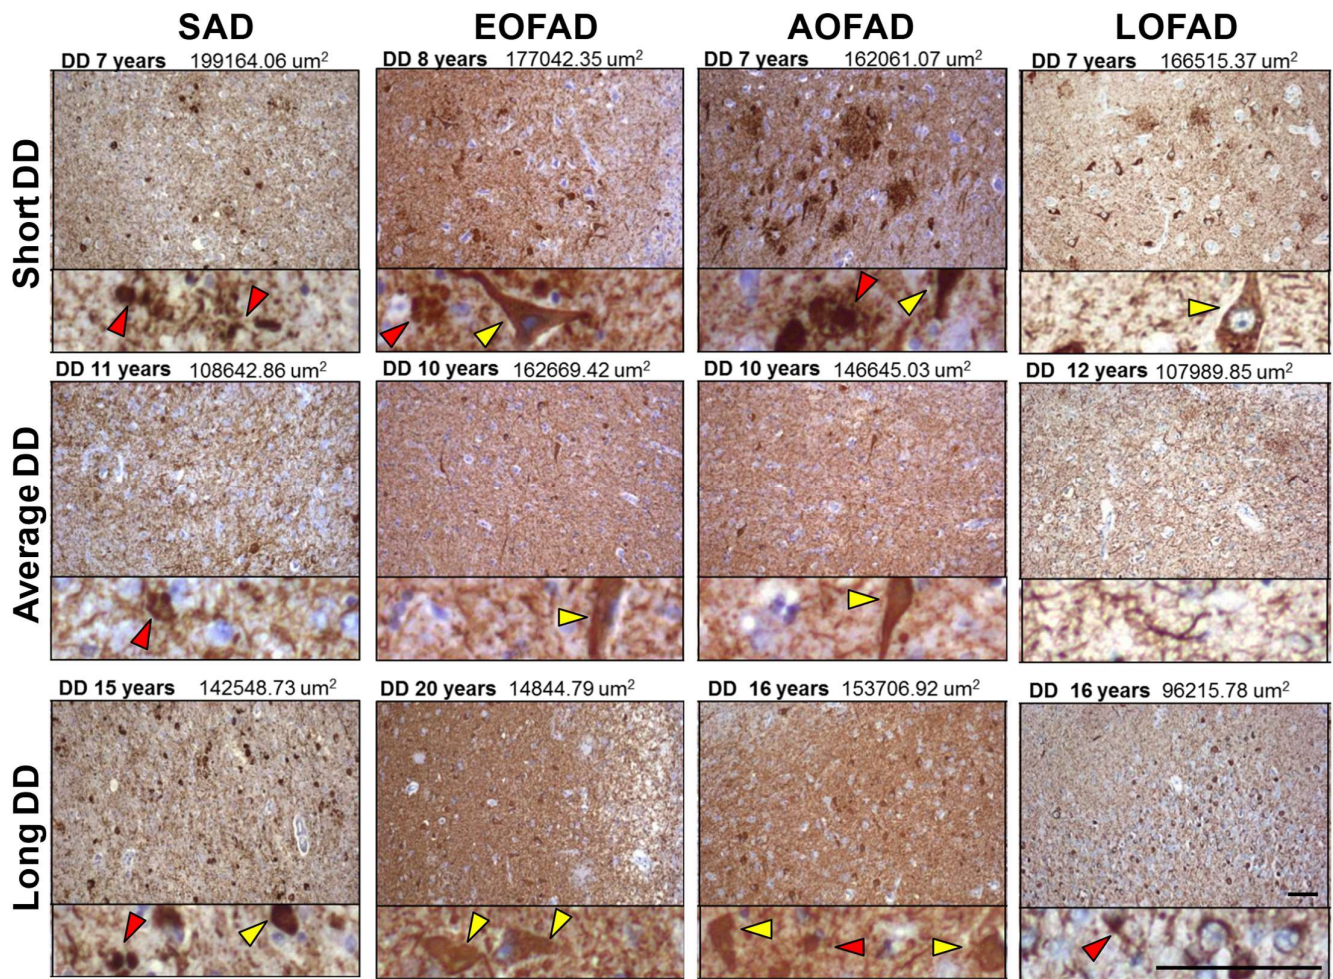

**Figure 4. pTau pathology according to disease duration and Age of Onset in PSEN1 E280A FAD patients.** Immunohistochemical staining for pTau using AT8 antibody in temporal cortex of selected cases from all groups according to their comparable disease duration (DD) long, average, or short. pTau loads differ with EOFAD and AOFAD showing in general higher loads and more extracellular distribution independently of DD, together with dystrophic neurites (red arrowheads) and NFTs (yellow arrowheads). (scale bar = 40  $\mu\text{m}$ ).

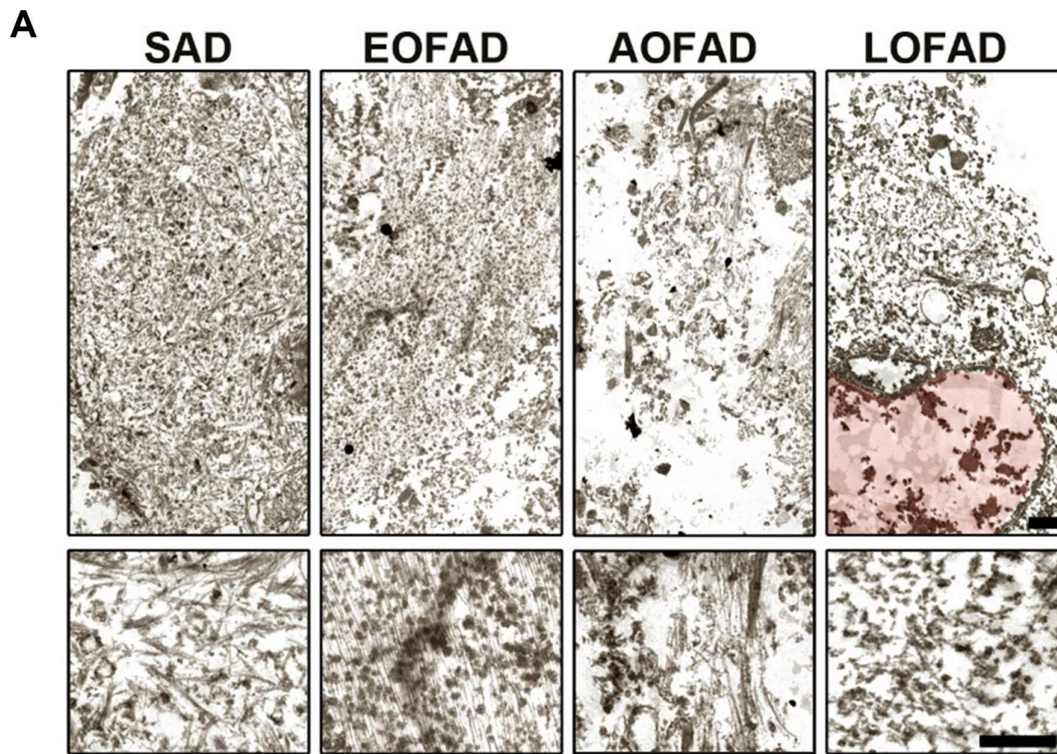

**Figure 5. Ultrastructural analysis of temporal cortex from the SAD and AoO groups of *PSEN1* E280A FAD.** SAD, EOFAD and AOFAD cases showed extracellular paired helical fragments as depicted at higher magnification in lower panels. LOFAD cases do not show such Tau aggregates. (Scalebar = 2  $\mu$ m, Nucleus in red).

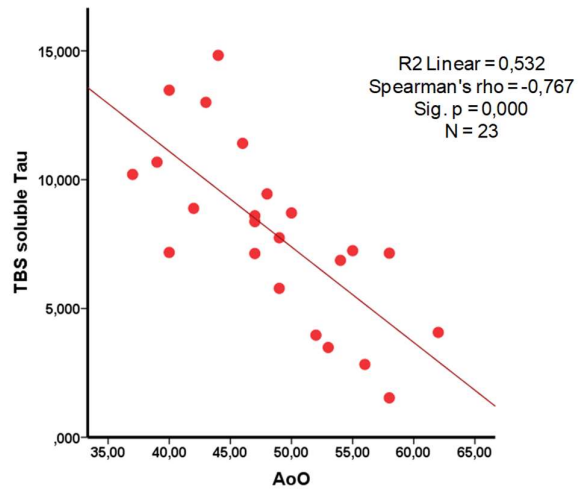

**Figure 6. Correlation analysis between levels of total Tau in TBS soluble fractions and AOO in PSEN1 FAD patients.**



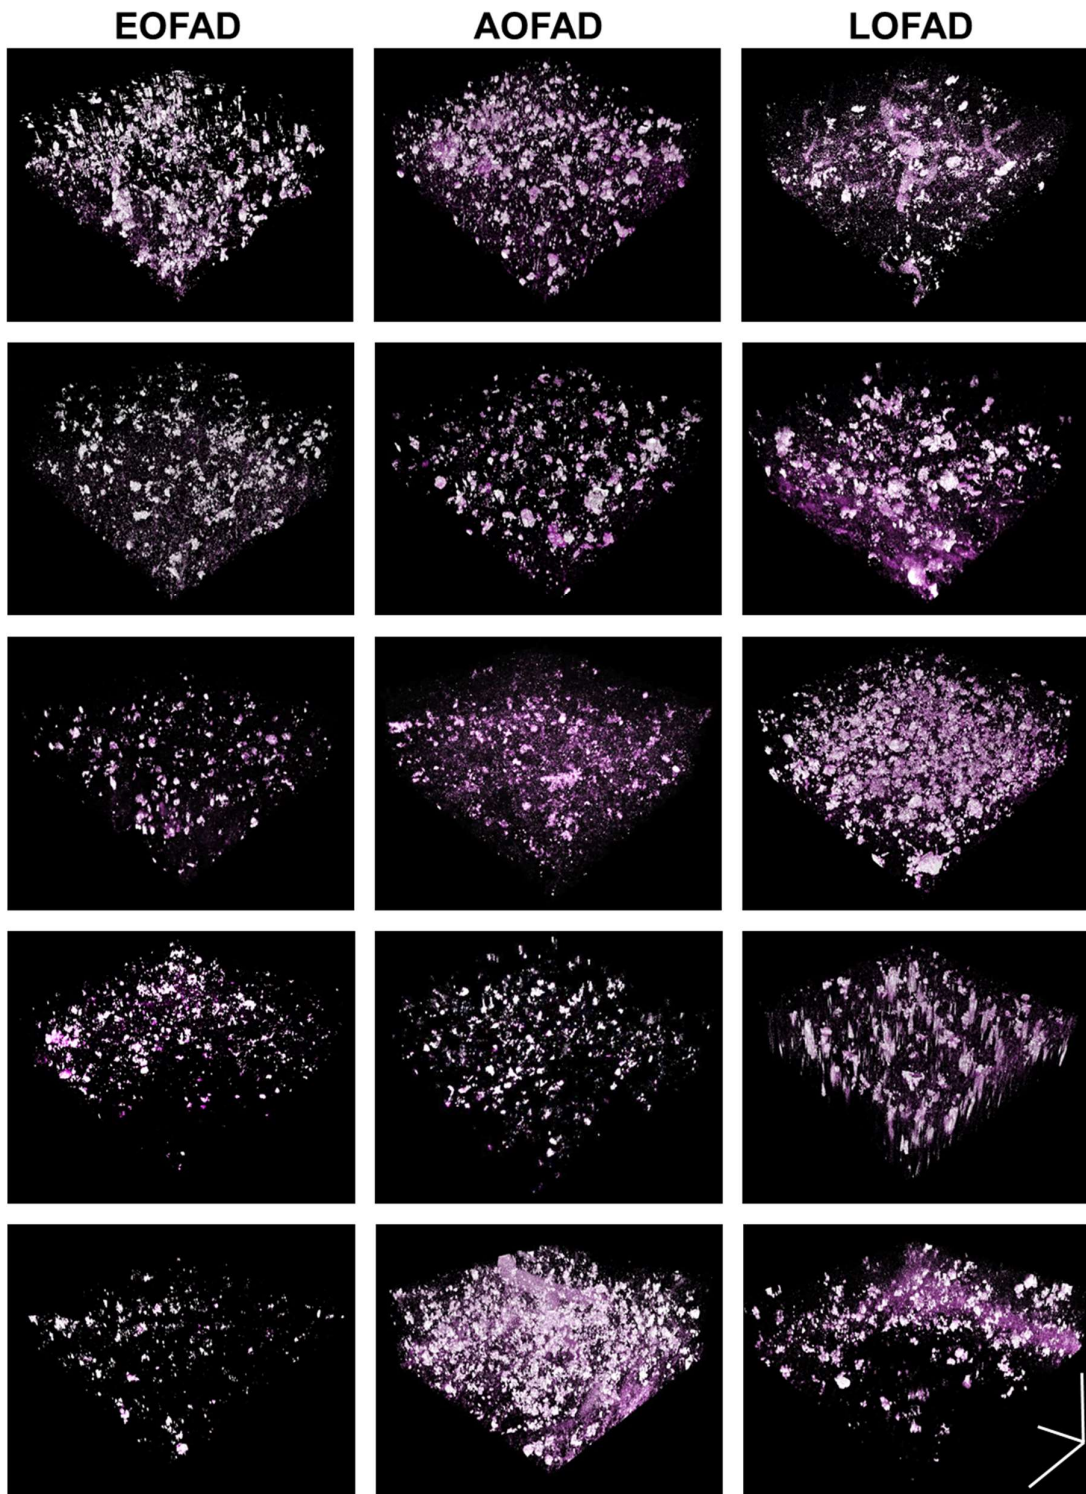

Figure 7. Representative 3D rendering of clarified formalin fixed temporal cortices from PS1E280A FAD cases stained for synaptophysin and grouped by age of onset. Scale bars=80  $\mu$ m.

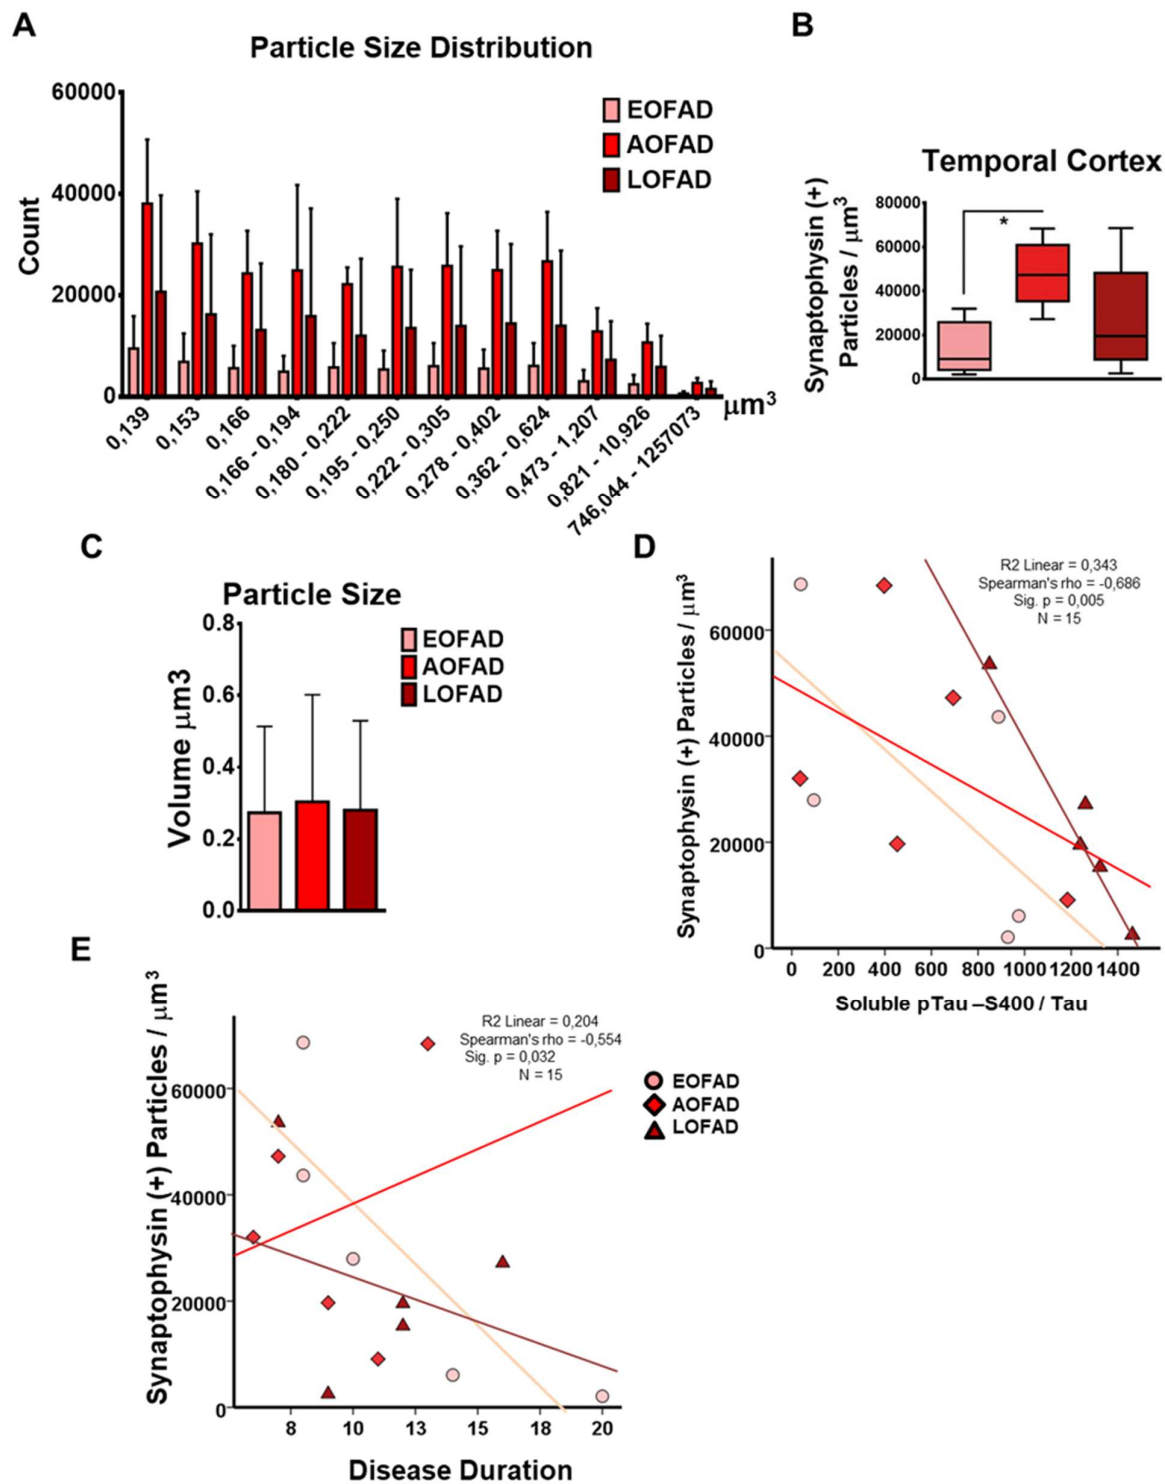

**Figure 8. Synaptophysin particle distribution according to size in PS1 E280A FAD cases grouped by age of onset.** A. Particle count according to size in PS1 E280A FAD cases grouped by age of onset. B. Average Synaptophysin-positive particle size in PS1 E280A FAD cases grouped by age of onset. C. Bar graphs for the density of small Synaptophysin-positive particles in temporal cortices of EOFAD (n=5), AOFAD (n=5) and LOFAD (n=5) cases. AOFAD cases showed significantly higher particle density when compared with EOFAD cases. (\* =  $p \leq 0.05$ ). D. Correlation analysis between Synaptophysin particles density and soluble pTau-S400 / Tau. E. Correlation analysis between Synaptophysin particles density and disease duration.

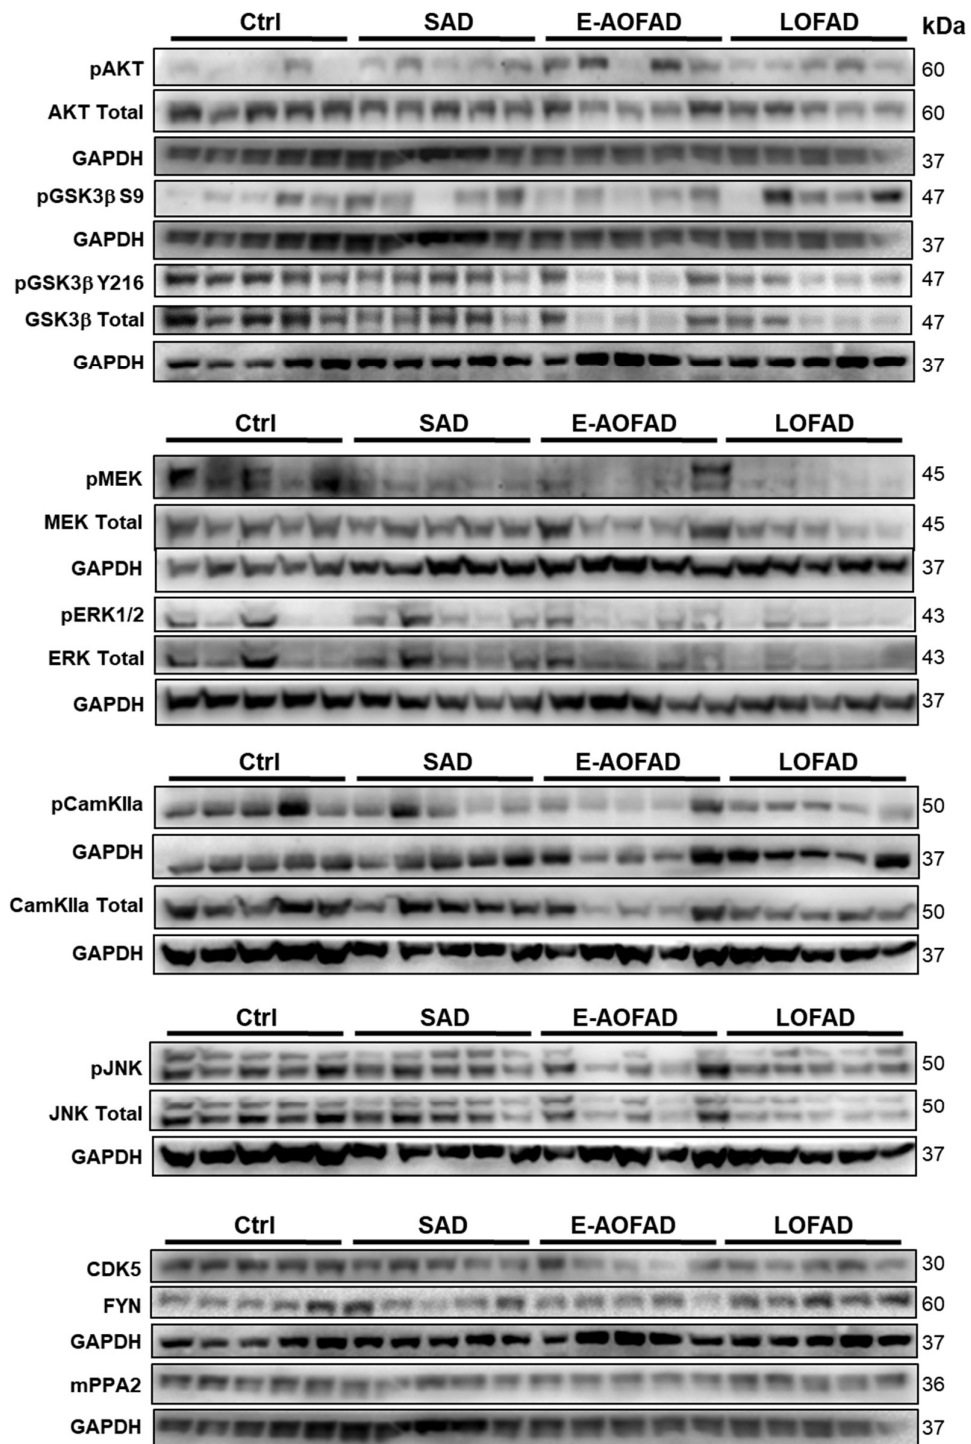

**Figure 9.** Representative blots of studied pTau-related kinases in Temporal cortex of controls, SAD and FAD cases

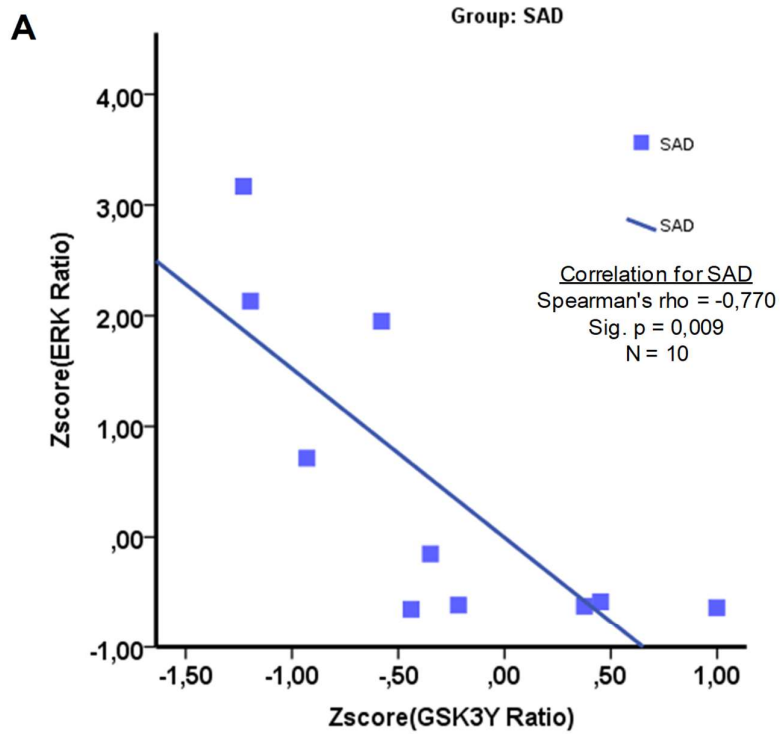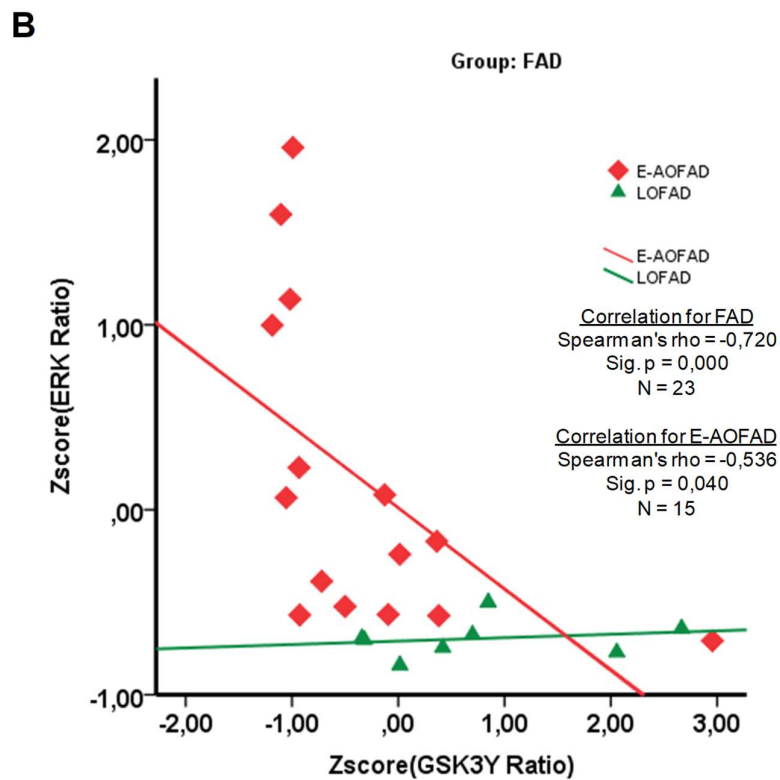

**Figure 10. Correlation of normalized pERK1/2 / ERK1/2 ratio normalized GSK3b Y216 / GSK3b levels.**  
A. SAD cases B. PSEN1E280A FAD cases. Colored lines depict group or subgroups tendencies.

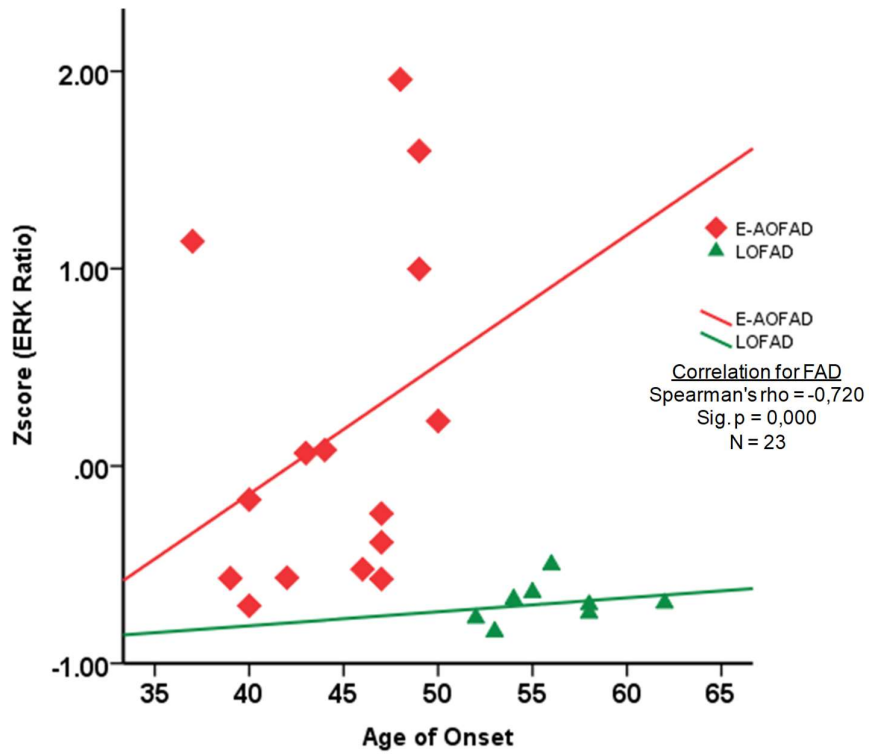

**Figure 11. Correlation of normalized pERK1/2 / ERK1/2 ratio and age of onset.** Colored lines depict group or subgroups tendencies.

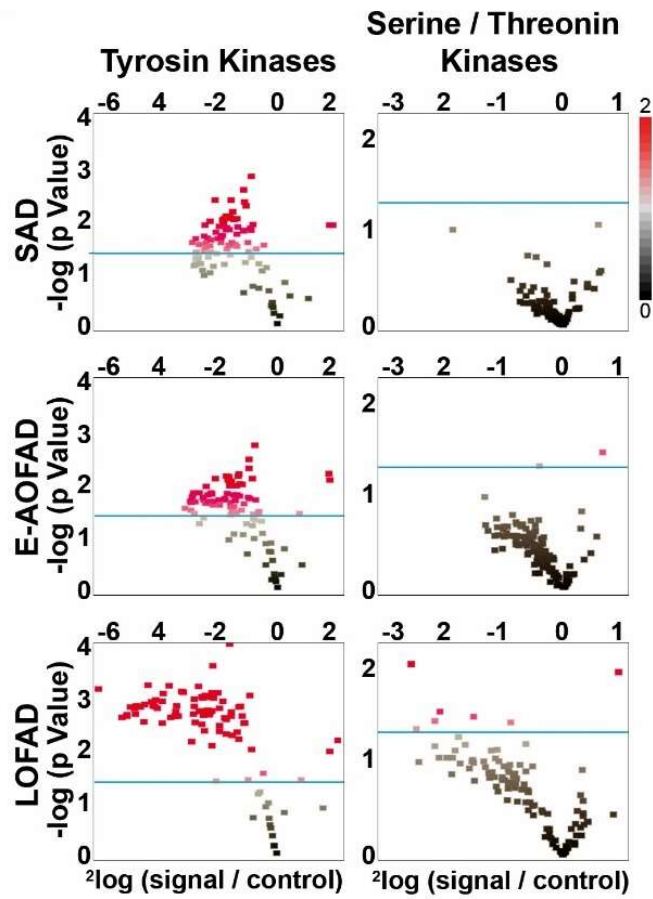

**Figure 12. Significantly different active Tyrosin and Serine/Threonine kinases between FAD cases and controls.** Volcano plot graph for significantly phosphorylated peptides in AD groups when compared against Control. Blue line represents significance threshold. Only LOFAD shows noticeable differences when compared with Control.

A

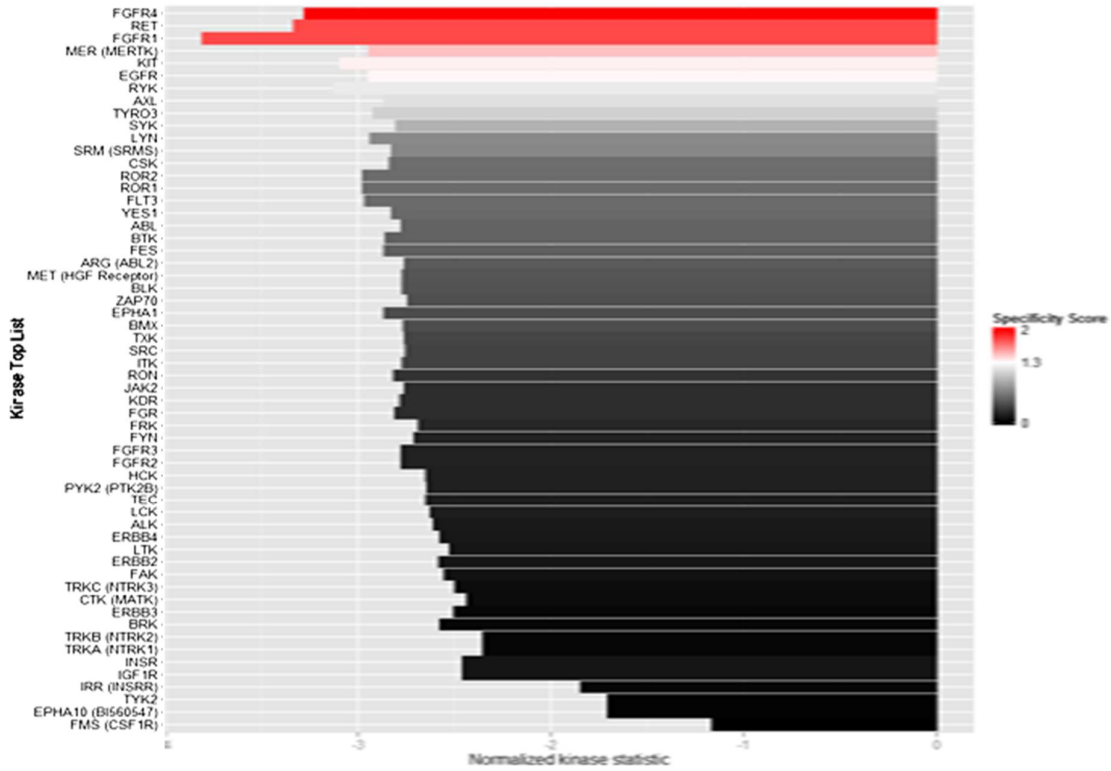

B

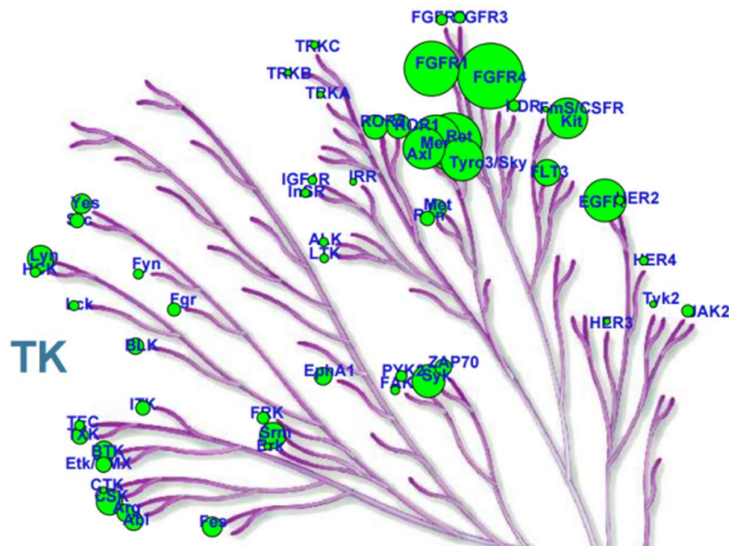

**Figure 13. Upstream kinase analysis of Tyrosine Kinases Ctrl vs LOFAD cases and dendritic tree of significantly specific kinases.** A. Bar plot of tyrosine kinases according to their score in the upstream kinase analysis for differences between controls and LOFAD cases. Length of each bar shows normalized kinase change between groups. Positive values indicate that this associated kinase activity was higher in LOFAD than in controls a negative value indicates the opposite. Color of the bars indicates specificity of the kinase set. B. Dendrogram of related significantly different tyrosine kinases in PSEN1E280A LOFAD cases. Size of green bubble indicates specificity.

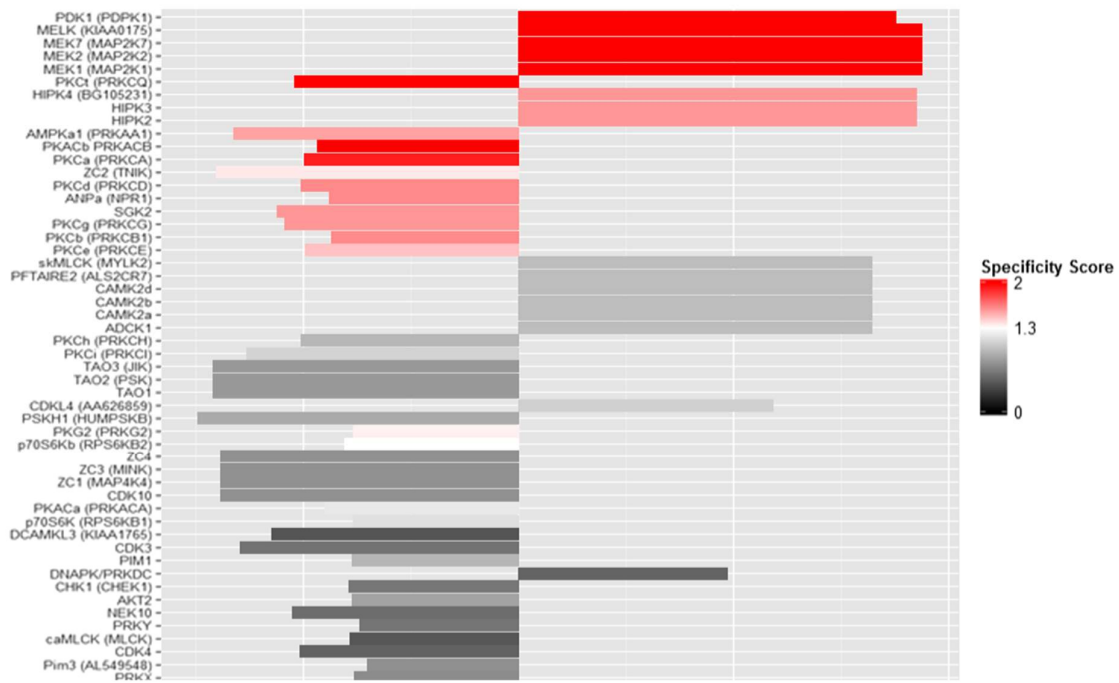

**Figure 14. Upstream kinase analysis of Serine / Threonine Kinases Ctrl vs LOFAD cases and dendritic tree of significantly specific kinases.** Bar plot of serine / threonine kinases according to their score in the upstream kinase analysis for differences between controls and LOFAD cases. Length of each bar shows normalized kinase change between groups. Positive values indicate that this associated kinase activity was higher in LOFAD than in controls a negative value indicates the opposite. Color of the bars indicates specificity of the kinase set.



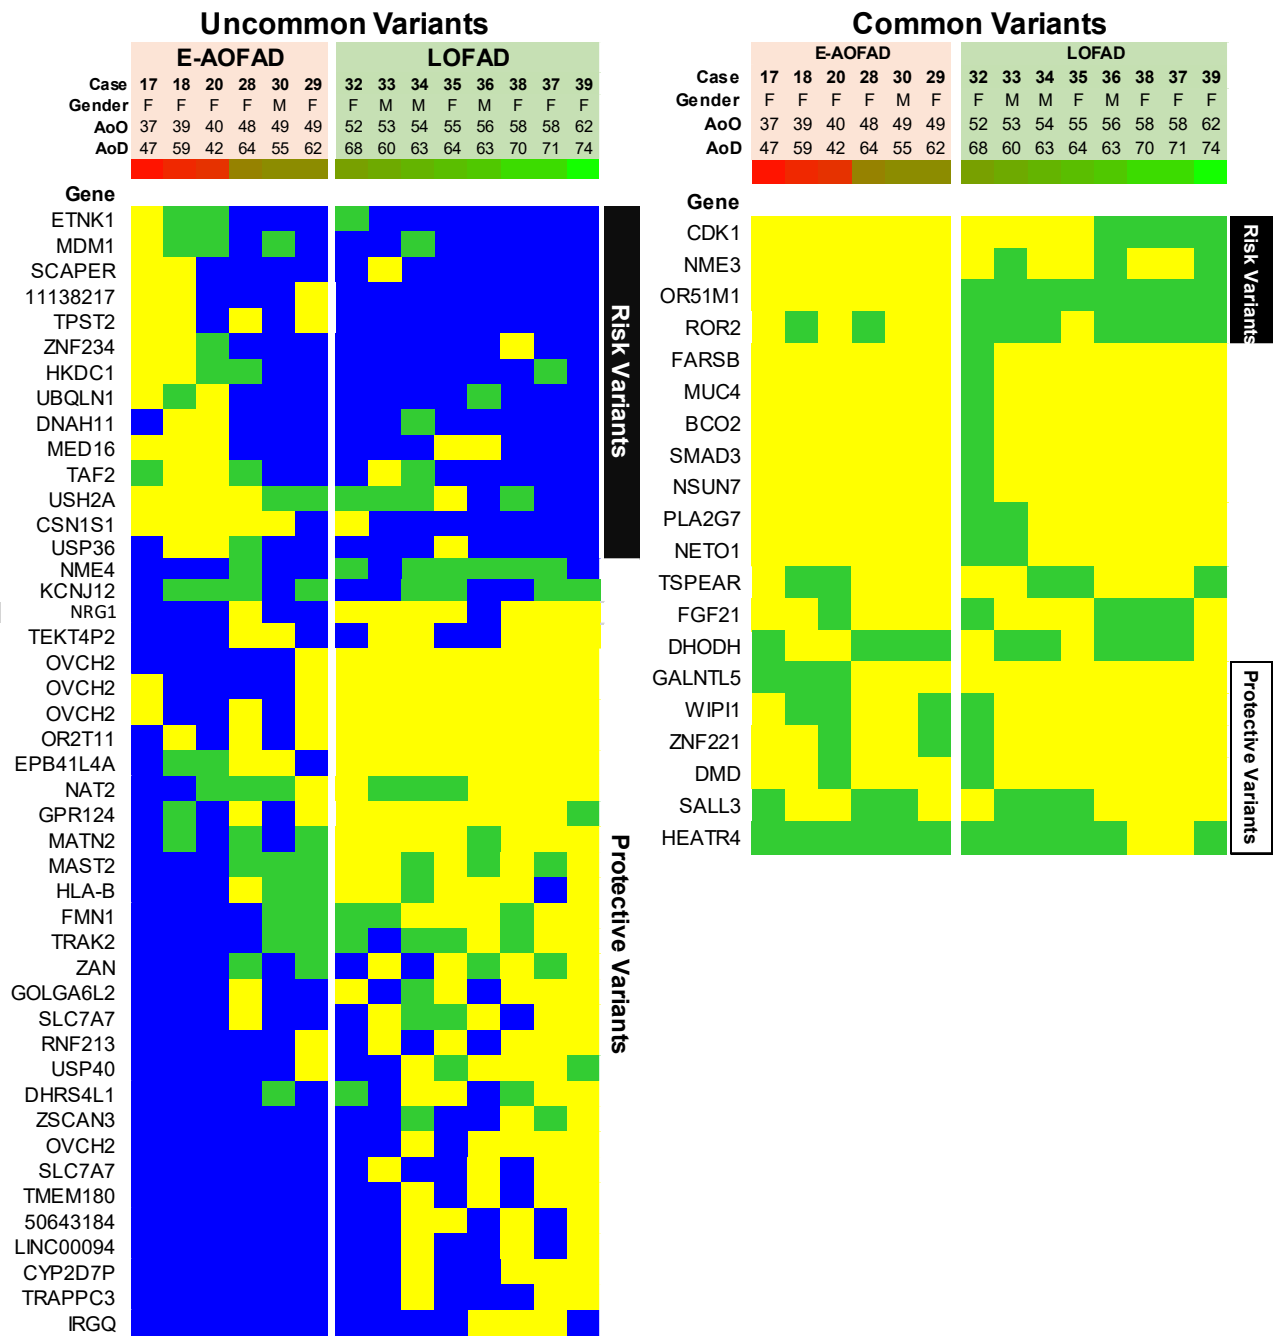

**Figure 15. Demographic characteristics and distribution of risk / protective genetic variants according to age of onset in studied PSEN1 E280A cases.** In pale red early and average onset cases and in pale green late onset cases. Variant homozygous = Yellow, Variant-Reference heterozygous = green, Reference homozygous = blue, AoO = Age of onset, AoD = Age of death.

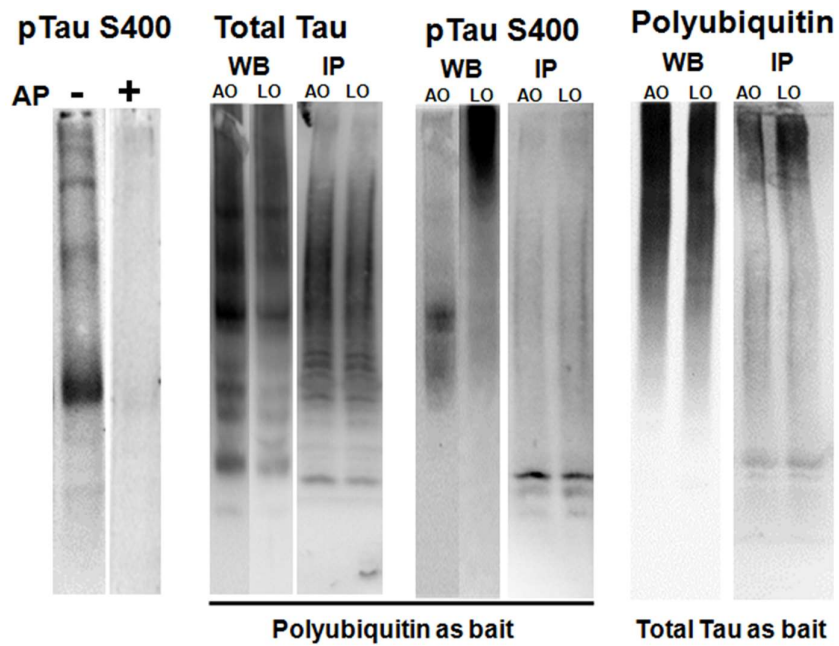

**Figure 16. Proof of principle for co-immunoprecipitation with anti-polyubiquitinated and anti-Tau antibodies in brain tissue.** First, we tested the specificity of the pTau S400 antibody using temporal cortex total homogenate and dephosphorylating the membrane with Alkaline phosphatase (AP) 1u/ug of protein during 1 hour at 37 °C before incubation with primary and secondary antibodies. Afterwards, using temporal cortex TBS fractions from one average onset and one late onset FAD cases we tested immunoprecipitation and western blots using antibodies against total Tau and polyubiquitin as baits and blotting with total tau, pTau s400 and polyubiquitin. At the left side for each test we placed how standard western blot looks for each case.

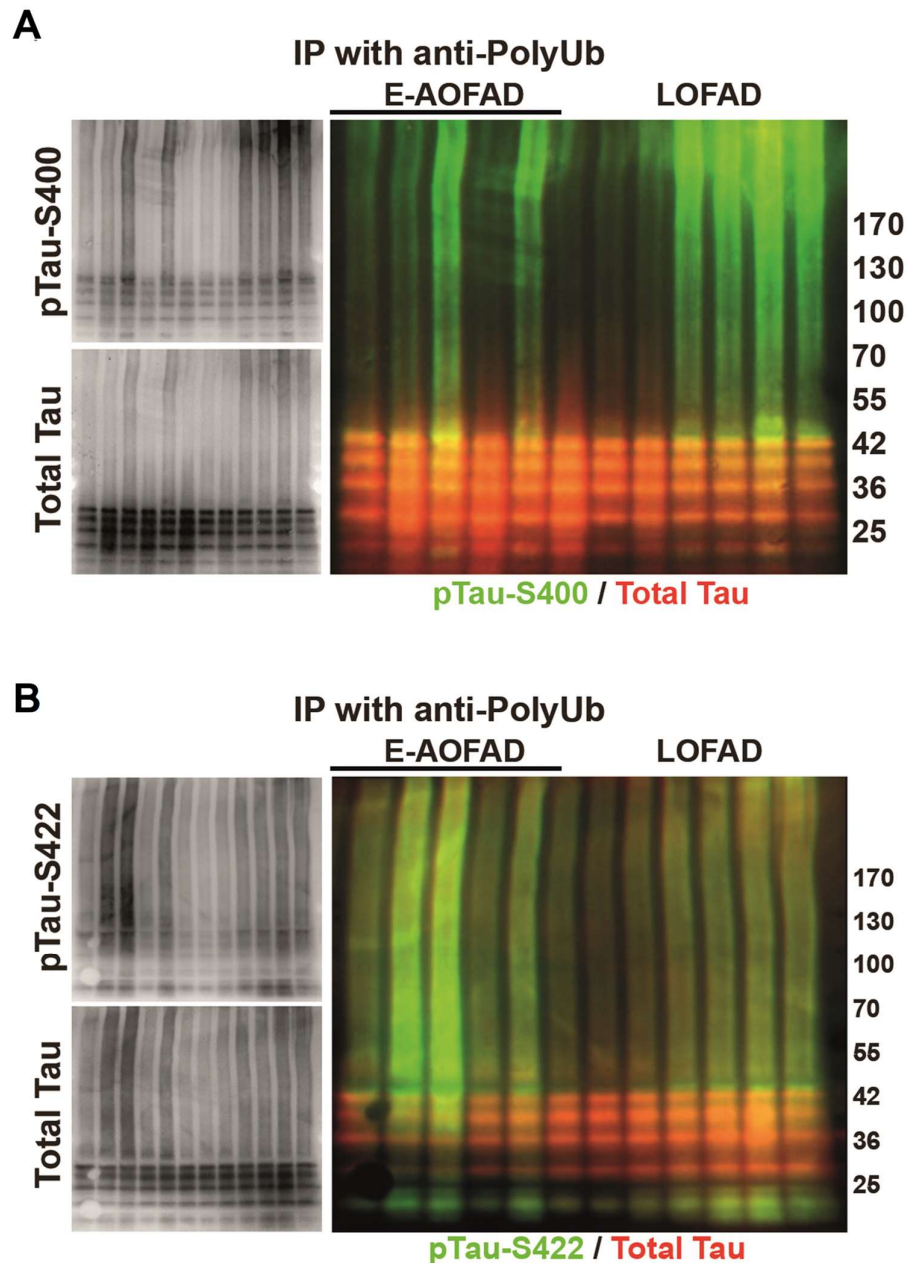

**Figure 17. Co-immunoprecipitation using monoclonal polyubiquitin antibody as bait and immunoblots for total Tau, pTau-S400 and pTau-S422.** A. Co-immunoprecipitation using monoclonal polyubiquitin antibody as bait and immunoblots for total Tau and pTau-S400 in TBS soluble fractions from temporal cortex of early and average AoO FAD (E-AOFAD, n = 5) and LOFAD (n = 7). B. Co-immunoprecipitation using monoclonal polyubiquitin antibody as bait and immunoblots for total Tau and pTau-S422 in TBS soluble fractions from temporal cortex of early and average AoO FAD (E-AOFAD, n = 5) and LOFAD (n = 7).

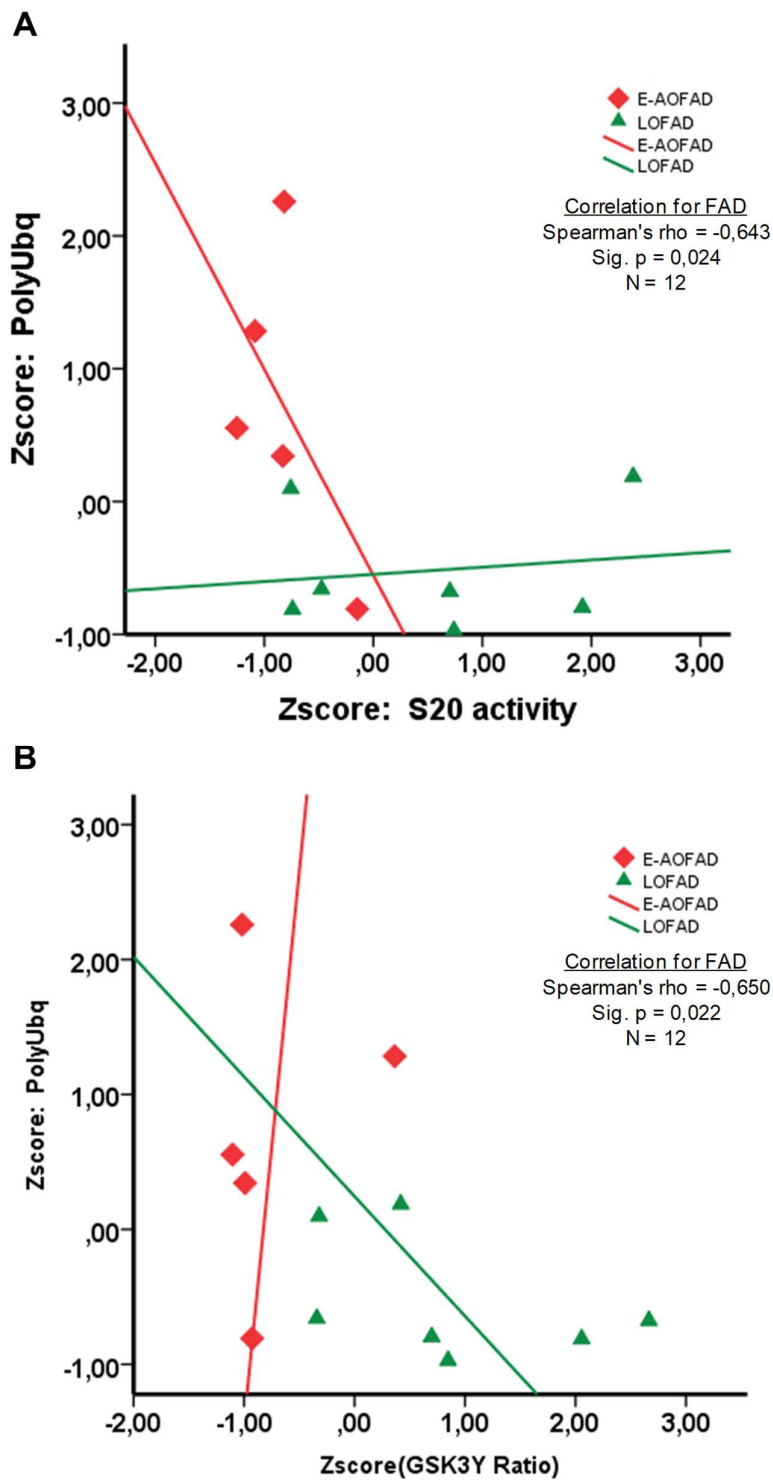

**Figure 18. Correlation of polyubiquitinated proteins with S20 Chymotrypsin activity and normalized GSK3b Y216 / GSK3b levels. Colored lines depict group or subgroups tendencies.**

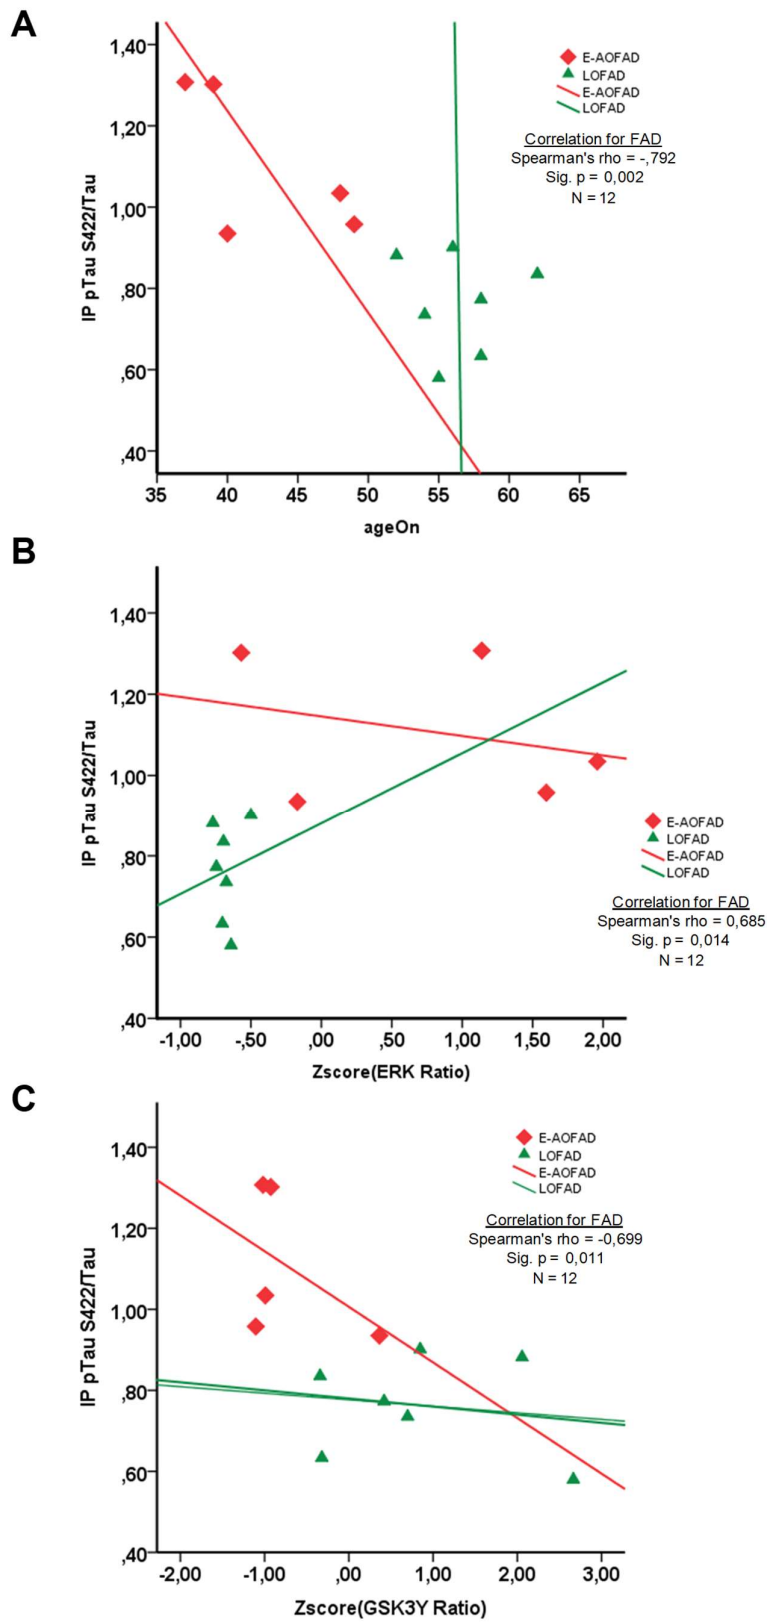

**Figure 19. Correlation of immunoprecipitated pTau S422/Tau with AoO, normalized pERK1/2 / ERK1/2 ratio and normalized GSK3b Y216 / GSK3b levels. Colored lines depict group or subgroups tendencies.**

# pTau seeding

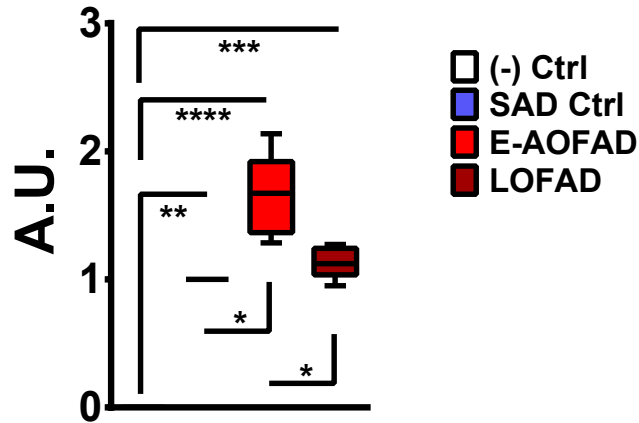

**Figure 20. pTau seeding activity in frontal cortex.** Bar graph representing pTau seeding capacity assays in temporal cortices homogenates from negative Controls (n=2), SAD (n=2), E-AOFAD (n=5) and LOFAD (n=5) cases. Both FAD groups showed increased pTau seeding activity when compared to negative controls and E-AOFAD showed increased activity compared to SAD samples. (\* =  $p \leq 0.05$ , \*\* =  $p \leq 0.01$ , \*\*\* =  $p \leq 0.001$ , \*\*\*\* =  $p \leq 0.0001$ ).
